# Supplementary material
Source: publisher figshare collection journal article supplement (https://springernature.figshare.com/articles/dataset/_/24204351)
Supplement: Supplementary file 1 [file 1]

## Sheet: General Information
Site description and characteristics of the six field study sites (seawater-dominated mangroves; Australia)
Site	Description	Latitude	Longitude	Salinity (ppt)	Tidal amplitude (m)	Annual Rainfall (mm)	Mangrove Species
Darwin	Sadgroves Creek within Darwin Harbour, Northern Territory.	-12.441°	130.860°	35.2 (34.7 - 36.0)	4.2	1681	36
Hinchinbrook Island	Coral Creek on Hinchinbrook Island, Great Barrier Reef (GBR), Queensland.	-18.244°	146.228°	35.4 (34.7 – 35.5)	2.4	1864	29
Seventeen Seventy	Tom’s Creek near Seventeen Seventy, Queensland.	-24.190°	151.876°	37.7 (35.7 – 39.4)	2.4	1067	13
Jacobs Well	Unnamed tidal creek in southern Moreton Bay, Queensland.	-27.783°	153.375°	36.4 (33.4 – 39.4)	1.5	1048	7
Newcastle	Dunns Creek near Newcastle, New South Wales.	-32.850°	151.767°	31.8 (28.5 – 34.7)	1.1	945	3
Barwon Heads	An unnamed tidal creek on Barwon River, south west Melbourne, Victoria.	-38.262°	144.496°	34.4 (26.8* – 36.2)	0.7	647	1
* Rainfall event occurred influencing salinity in surface waters.
Description of the parameters analysed in the six field study sites
Date/Time	Date and time of sampling
Temperature (°C)	Water temperature (°C)
Salinity	Water salinity
pH (NBS)	Water pH (NBS)
DO(%)	Dissolved oxygen (%)
DO mg/L	Dissolved oxygen (mg L-1)
Depth (m)	Water depth (m) in the mooring station
Current velocity (cm/s)	Current velocity (cm s-1) in the mooring station
Windspeed (m/s)	Wind speed (m s-1) in the mooring station
Rn (dpm/m3)	Dissolved radon (dpm m-3)
CH4 (nM)	Dissolved CH4 (nmol L-1)
d13C-CH4	Stable isotopic signature of dissolved CH4 (‰)
pCO2 (uatm)	Water partial pressure of CO2 (µatm)
d13C-CO2	Stable isotopic signature of dissolved CO2 (‰)
Water Volume (m3)	Water volume in the mangrove during sampling
Water area (m2)	Surface area occuped by water i the mangrove during sampling
Exposed area (m2)	Surface area occuped by exposed sediments in the mangrove during sampling
Flux CH4 (RC01) (mmol/m2/d)	Water-atmosphere CH4 flux (mmol m-2 d-1) according to the gas transfer parameterizaiton of Raymond and Cole (2001)
Flux CH4 (W92) (mmol/m2/d)	Water-atmosphere CH4 flux (mmol m-2 d-1) according to the gas transfer parameterizaiton of Wanninkhof (1992)
Flux CH4 (BO04) (mmol/m2/d)	Water-atmosphere CH4 flux (mmol m-2 d-1) according to the gas transfer parameterizaiton of Borges et al. (2004)
Flux (HO14) (mmol/m2/d)	Water-atmosphere CH4 emission (mmol m-2 d-1) according to the gas transfer parameterizaiton of Ho et al. (2014)

## Sheet: Darwin Mangrove
Date/Time	Temperature (°C)	Salinity	pH (NBS)	DO(%)	DO mg/L	Depth (m)	Current velocity (cm/s)	Windspeed (m/s)	Rn (dpm/m3)	CH4 (nM)	d13C-CH4	pCO2 (uatm)	d13C-CO2	Water Volume (m3)	Water area (m2)	Exposed area (m2)	Flux CH4 (RC01) (mmol/m2/d)	Flux CH4 (W92) (mmol/m2/d)	Flux CH4 (BO04) (mmol/m2/d)	Flux (HO14) (mmol/m2/d)
2014-07-29 18:03:00	27.7167	35.4456	6.95499	114.329	6.22646	5.72648	13.8717	6.23737		15.6625	-65.7	2013.97	-10.2	2.13175e+06	63511.1	94613.9	0.0673611	0.0502733	0.0618277	0.0681335
2014-07-29 19:02:59	26.9275	34.8985	6.98599	116.614	6.36494	6.5884	9.22667	4.71759		15.5799	-126	687.195	-8.93	2.67687e+06	65966.5	754.468	0.039222	0.0285041	0.0489519	0.0418204
2014-07-29 20:02:59	26.7797	34.8346	6.99149	116.35	6.37148	6.93482	5.82467	4.79167	1676.64	30.2821	-143	615.131	-6.17	2.91429e+06	666983	62732.2	0.0831347	0.0607341	0.100025	0.0859183
2014-07-29 21:02:59	26.7979	34.979	6.96	113.764	6.22956	6.67596	12.9498	4.51852	1272.84	33.6869	-211	590.92	-2.87	27427.4	66147.6	68244.4	0.0845008	0.0604017	0.112667	0.0937556
2014-07-29 22:02:59	26.5295	35.1553	6.899	18.57	5.961	5.73877	19.2148	3.75	1868.51	8.11713	-162	569.437	-8.17	2.13972e+06	63534.3	9441.73	0.0127449	0.00821133	0.0206961	0.0160144
2014-07-29 23:02:59	26.3856	35.2393	6.86754	13.1178	5.67314	4.43934	2.68633	3.88889	2934.51	13.6447	-70.6	504.239	-10.9	1.3433e+06	588782	14932.6	0.0250404	0.016527	0.0349189	0.0266379
2014-07-30 00:02:59	26.3714	35.2461	6.86496	12.1638	5.62181	3.26411	1.34683	3.18519	2724.13	15.0188	-70	782.95	-10.8	67628.1	531976	197739	0.0218408	0.012371	0.0325336	0.0234094
2014-07-30 01:02:59	26.2699	34.2989	6.35798			2.48773	5.49167	2.63889	2226.94	10.6035	-68.4	786.888	-10.7	316576	3485.25	389630	0.0120974	0.0056943	0.0219527	0.0160977
2014-07-30 02:02:59	26.9167	28.725	6.81778			2.89633	2.95517	2.375	3216.79	10.0984	-68.9	719.582	-11.4	17795.2	14921.3	624794	0.0109401	0.00457472	0.0177744	0.0130715
2014-07-30 03:02:59	26.6444	26.7682	6.32458			2.188	2.53333	2.24537	3886.93	22.2664	-68.6	773.208	-11.3	18466.4	118284	61144	0.0261401	0.0102236	0.0436743	0.0322461
2014-07-30 04:02:59	26.9641	26.1728	6.77944	96.9421	5.63827	2.76626	5.21883	2.13889	4191.49	23.2312	-69.7	844.913	-11.9	437527	428366	31349.5	0.0265717	0.00978819	0.0465306	0.0351489
2014-07-30 05:02:59	26.1571	26.7385	6.89956	99.4111	5.75967	4.42675	12.9418	1.85185		18.1645	-69.2	929.295	-11.4	119931	577616	15299	0.0181451	0.00553999	0.0359252	0.0276082
2014-07-30 06:02:59	26.3767	26.9948	6.8835	14.4133	6.56511	5.47167	15.994	1.72685		12.3666	-67.4	858.47	-10.2	197317	624688	1526.53	0.0112106	0.00310941	0.022111	0.0172384
2014-07-30 07:02:59	25.9125	27.4517	6.94478	19.2286	6.32838	6.6254	16.6175	2.83796		8.38017	-63.6	688.049	-9.53	277739	66754.5	6896.51	0.0102244	0.00519156	0.018412	0.0135711
2014-07-30 08:02:59	25.895	29.1278	6.95	11.6542	6.35648	7.35454	23.3428	3.39815	2161.92	5.08966	-60.5	574.243	-9.36	321587	696899	32816.5	0.00613317	0.00366999	0.0106035	0.00798373
2014-07-30 09:02:59	25.9128	NA	6.94344	11.134	6.28617	7.54662	1.86567	4.46296	2251.69	4.89067	-61.7	555.693	-9.07	33688.5	722557	7158.32	0.0103649	0.00736975	0.0119303	0.0100202
2014-07-30 10:02:59	25.8386	34.9652	6.84798	13.7678	5.77966	7.27413	36.9722	6.95374	2668.72	8.84388	-69.6	571.055	-9.89	2.98274e+06	67555.3	54659.7	0.0434405	0.0313593	0.0392036	0.0468088
2014-07-30 11:02:59	25.7994	35.1151	6.82248	12.159	5.68146	5.76456	25.3865	8.35648		11.9898	-68.1	669.325	-9.96	2.15672e+06	635553	94161.8	0.10252	0.0654137	0.0650901	0.104537
2014-07-30 12:02:59	25.9363	35.2588	6.79244	12.6941	5.6912	4.29799	23.75	7.59259	3558.94	14.5408	-69.5	735.928	-10.4	1.259e+06	585189	144527	0.0981006	0.0675117	0.0761281	0.103253
2014-07-30 13:02:59	26.7556	35.2768	6.78949	13.6527	5.73137	3.27159	8.48333	8.35648		16.7727	-71.4	823.773	-10.4	677773	53712	19264.3	0.151607	0.0967342	0.0890277	0.148327
2014-07-30 14:02:59	26.3399	35.336	6.7715	14.447	5.74712	2.71599	2.9245	7.17593		7.37259	-70.9	849.754	-9.85	48563.5	43196.6	298618	0.03718	0.026444	0.0283206	0.0366987
2014-07-30 15:02:59	26.5367	35.3964	6.74897	15.7444	5.79528	2.52278	3.27617	7.61852	4173.54	18.1535	-70.7	777.174	-10.6	327314	363584	366131	0.127534	0.0875698	0.0875295	0.124855
2014-07-30 16:02:59	26.4653	35.4519	6.71744	14.6929	5.74363	2.8819	5.22133	7.17593	4337.3	25.7136	-71.5	886.312	-10.8	484615	4748	259245	0.159564	0.113488	0.123856	0.159729
2014-07-30 17:02:59	26.5815	35.3322	6.76349	17.6752	5.89852	3.8816	11.9645	8.12374	3897.58	22.7642	-69.5	952.846	-10.4	115769	57311.8	15673.2	0.195291	0.127757	0.123751	0.193978
2014-07-30 18:02:59	26.7842	35.1145	6.82351	111.941	6.12522	5.17963	15.577	7.46759	2829.22	16.9668	-69.6	854.939	-9.36	1.79275e+06	612896	116819	0.112688	0.0783733	0.0827519	0.113185
2014-07-30 19:02:59	27.9864	34.9985	6.86799	116.378	6.32742	6.24556	1.55867	5.63426		11.4465	-67.7	728.602	-8.88	2.45947e+06	652338	77377.2	0.0381969	0.0287277	0.0353778	0.0358009
2014-07-30 20:02:59	26.7891	34.8622	6.88249	115.666	6.33222	6.86277	8.47283	4.32874		9.19987	-66	653.678	-8.88	2.86537e+06	665359	64355.8	0.0183656	0.0128757	0.0244787	0.0198643
2014-07-30 21:02:59	26.836	34.9235	6.86711	114.994	6.28694	6.92911	7.45567	2	2225.97	9.12959	-67	606.518	-9.18	291586	6677.19	6277.85	0.00805092	0.00272223	0.0136498	0.0101402
2014-07-30 22:02:59	26.7349	35.1522	6.81798	111.736	6.77933	6.32573	17.8398	2.46296	2486.24	10.7898	-67.8	632.827	-9.56	2.51153e+06	6549.85	7575.15	0.0115797	0.00504963	0.0216461	0.01613
2014-07-30 23:02:59	26.4654	35.3722	6.75151	14.2544	5.73511	5.13174	21.1258	1.27778	3399.48	14.3292	-69.3	698.411	-10.6	1.7638e+06	611161	118554	0.010616	0.00188655	0.0231527	0.0191311
2014-07-31 00:02:59	26.2871	35.3837	6.71489	99.5724	5.48911	3.83939	15.344	1.64815	3278.36	16.1999	-69.6	809.221	-10.7	991244	57187.1	15797.9	0.0138682	0.00360174	0.029911	0.0235044
2014-07-31 01:02:59	26.3469	35.2637	6.74342	12.4744	5.6377	2.87421	6.738	0.736111	3527.83	14.4308	-69.2	839.818	-10.4	482364	467723	261992	0.00885302	0.00063112	0.0166727	0.0153336
2014-07-31 02:02:59	26.2495	35.3259	6.721	1.36422	5.53294	2.3326	2.481	2.61852		12.2755	-68.1	779.106	-11.2	257919	267366	462349	0.0141711	0.00661482	0.023906	0.0171878
2014-07-31 03:02:59	26.1695	35.3822	6.7165	99.757	5.54611	2.17123	2.58217	2.28737	3599.65	18.1679	-68	640.419	-11.2	23721.3	171919	557796	0.0196975	0.00787812	0.0345025	0.0249891
2014-07-31 04:02:59	26.8512	35.3411	6.74944	99.9817	5.52131	2.52949	3.797	1.95374		18.4367	-68.5	821.428	-11.1	33472.3	35492.2	374795	0.0179219	0.00587714	0.0316856	0.0238023
2014-07-31 05:02:59	26.1245	35.3142	6.74444	98.8966	5.4616	3.51667	9.93833	1.11575	3814.67	17.9731	-68.7	840.787	-11.4	812419	552418	177298	0.0129184	0.00185255	0.02635	0.0221451
2014-07-31 06:02:59	26.1739	35.1169	6.74952	11.7567	5.6211	4.89425	16.1333	2.34259	3419.81	14.7302	-68.1	865.52	-10.4	1.61859e+06	62667.2	12747.8	0.0158991	0.006542	0.0316095	0.0235271
2014-07-31 07:02:59	26.3178	34.8599	6.81351	16.85	5.92599	6.17738	13.6857	2.42593	2463.23	9.81759	-65.1	759.82	-9.4	2.41676e+06	649895	79819.9	0.0101833	0.00436437	0.018848	0.0138669
2014-07-31 08:02:59	25.9922	34.6956	6.84348	19.8311	6.979	7.83627	2.863	2.64815	1987.81	6.63138	-61.8	623.715	-9.19	3254.49	675931	53783.7	0.00662459	0.00312998	0.0104066	0.00729634
2014-07-31 09:02:59	25.9915	34.6722	6.844	11.1622	6.119	7.51251	14.282	2.99537	2222.3	4.86307	-60.3	567.387	-8.82	3.33381e+06	71646.2	13255	0.00474357	0.00253937	0.00825525	0.00602154
2014-07-31 10:02:59	26.1967	34.8425	6.83989	16.4743	5.91197	7.32468	24.2433	4.52778		7.34579	-64.3	567.388	-9.49	3.19412e+06	694353	35362.4	0.0146871	0.0105074	0.0210974	0.0174315
2014-07-31 11:02:59	26.8389	35.1168	6.75997	13.6222	5.74436	6.34556	29.7198	5.27778	2995.24	10.4934	-67.7	635.598	-9.72	2.52618e+06	653826	75889.2	0.0300271	0.0224492	0.0373305	0.0343732
2014-07-31 12:02:59	26.1152	35.2314	6.72511	12.4879	5.66516	4.87532	26.963	5.39815	3464.27	12.7676	-69	695.304	-10.1	16721.5	62229.7	127485	0.0392399	0.0294244	0.0501224	0.0462387
2014-07-31 13:02:59	26.3293	35.3598	6.68957	13.1411	5.67524	3.61834	15.898	4.99747		16.6892	-71	741.33	-10.4	865674	56374.5	16664.5	0.0463309	0.0342582	0.0621823	0.0545614
2014-07-31 14:02:59	26.5554	35.2696	6.74478	14.9924	5.75787	2.88493	6.14983	4.32874	4174.89	16.1901	-71.2	848.544	-10.1	485246	475399	254316	0.0355257	0.0249062	0.049987	0.0405213
2014-07-31 15:02:59	26.8435	35.329	6.65456	15.4996	5.75498	2.53583	2.262	6.14352		19.8094	-70.7	818.851	-10.6	33538.5	365661	36453.7	0.0840787	0.0629088	0.0778085	0.0833961
2014-07-31 16:02:59	27.5247	35.3855	6.39113	111.298	5.98422	2.58557	3.9935	5.86111		23.6982	-70	873.04	-11	353237	38638.4	343677	0.0931494	0.0700258	0.0909435	0.0937683
2014-07-31 17:02:59	27.6991	35.2665	6.77667	113.764	6.12721	3.24971	7.9685	5.49537	4848.21	22.9055	-69.1	942.917	-10.4	668783	529897	199818	0.0792017	0.0594895	0.0852369	0.0828106
2014-07-31 18:02:59	26.8792	35.1699	6.71267	19.4979	5.97387	4.45734	14.2837	5.14352		19.1217	-69.7	843.193	-10	135468	589217	14498.4	0.0570787	0.0424804	0.0702346	0.0635589
2014-07-31 19:02:59	27.1886	34.9169	6.78648	115.814	6.27381	5.67815	11.745	4.21296	3236.41	13.817	-67.8	826.105	-8.82	21159.4	633274	9644.62	0.0287295	0.0198675	0.0398388	0.0323248
2014-07-31 20:02:59	26.8122	34.816	6.835	114.576	6.27167	6.52124	7.6715	2.59722	2455.48	10.2978	-65.1	665.529	-8.74	2.63758e+06	658546	71169.4	0.0115118	0.005326	0.0190866	0.0139119
2014-07-31 21:02:59	26.6591	34.7796	6.81489	114.145	6.26696	6.88422	5.6455	1.92593	2222.33	8.39842	-63.3	616.263	-8.86	2.87951e+06	66555.8	64164.2	0.00705986	0.00227171	0.0117343	0.00868522
2014-07-31 22:02:59	26.7734	34.8915	6.77749	112.979	6.18394	6.65338	1.559	0.162374	2927.35	7.74914	-49.3	597.878	-10.5	2.72476e+06	66989.4	68725.7	0.00343378	1.45595e-05	0.00314816	0.00420123
2014-07-31 23:02:59	26.7375	35.1249	6.71549	18.5157	5.93554	5.77768	19.4648	0.722222	3443.27	12.1633	-67.8	394.59	-10.3	2.16354e+06	636887	92829	0.0072603	0.000500658	0.0146651	0.0135707
2014-08-01 00:02:59	26.6495	35.2346	6.66851	13.5978	5.66798	4.55435	21.7373	0.462963		15.5006	-69.1	692.533	-10.8	1.41212e+06	5917.3	13814.7	0.00875134	0.000271531	0.0192231	0.0189415
2014-08-01 01:02:59	26.5345	35.1799	6.65922	11.2682	5.55819	3.4427	12.3555	0.37963	3641.16	15.7004	-68.9	789.368	-10.5	769429	551577	178138	0.00861924	0.000185144	0.0172475	0.0175815
2014-08-01 02:02:59	26.458	35.167	6.66799	13.1627	5.66938	2.7493	5.598	1.41667	3758.42	15.4085	-68.7	772.95	-10.7	423738	439663	2951.66	0.0121243	0.00252277	0.022994	0.0183458
2014-08-01 03:02:59	26.4145	35.217	6.648	11.4222	5.57899	2.43725	2.7695	1.86111		16.9806	-68.3	763.289	-10.8	29464.6	324679	4535.59	0.0157892	0.00485326	0.0275895	0.0205843
2014-08-01 04:02:59	26.367	35.1485	6.63299	1.28467	5.51798	2.51577	3.5795	2.35185	4322.73	17.7681	-68.7	803.435	-11.1	325319	357416	372300	0.0197239	0.00815357	0.0347416	0.0253206
2014-08-01 05:02:59	26.3182	35.2839	6.61333	98.8233	5.43954	3.16645	7.16433	2.45374		19.8306	-68.8	833.81	-11.4	62691.3	518967	21748.2	0.0230454	0.0100066	0.0427143	0.0314116
2014-08-01 06:02:59	26.3999	35.1369	6.64499	1.53544	5.52922	4.36859	16.1483	2.71296	3936.5	17.3735	-68.5	893.569	-10.8	131150	586965	142750	0.021836	0.0105854	0.0419542	0.0312543
2014-08-01 07:02:59	26.2285	34.9475	6.6985	13.7844	5.73252	5.66796	15.4697	2.65747		13.649	-67.2	822.038	-10.1	295427	632639	9776.98	0.0162967	0.00772893	0.0304418	0.0224229
2014-08-01 08:02:59	26.81	34.7517	6.73949	17.6993	5.96896	6.68657	13.5353	2.24537		8.75842	-63.6	704.981	-9.3	274857	6623.87	67711.1	0.00833842	0.00326123	0.0151022	0.0112434
2014-08-01 09:02:59	26.1449	34.7151	6.75	19.5351	6.69111	7.28139	17.2183	2.47685		6.29543	-61.6	614.295	-8.92	316136	687615	421.168	0.00581126	0.00255039	0.0108841	0.00799152
2014-08-01 10:02:59	26.1625	34.7885	6.7225	17.4192	5.94894	7.33494	12.1768	3.85185		7.04151	-63.7	593.619	-9	3218.35	692444	3727.62	0.0109587	0.00718838	0.0166169	0.0127311
2014-08-01 11:02:59	26.21	34.9252	6.68499	14.5111	5.74611	6.67538	28.4347	4.23148	3353.41	11.292	-66.6	630.757	-9.45	2.73883e+06	66276.8	67638.2	0.0226488	0.0156984	0.0352892	0.0283624
2014-08-01 12:02:59	26.2771	35.6948	6.64493	12.328	5.64862	5.37668	25.4762	4.21296		13.746	-68.8	723.584	-9.42	1.91126e+06	62594.6	1912.44	0.0281581	0.0194724	0.0445261	0.0357899
2014-08-01 13:02:59	26.4161	35.2449	6.62533	12.4133	5.61833	4.59792	17.7667	6.48148	3619.86	20.6115	-72.2	784.114	-19.1	1.11794e+06	579218	15496.8	0.0985625	0.0729256	0.0944795	0.10503
2014-08-01 14:02:59	26.6655	35.1282	6.59593	12.3192	5.64944	3.18668	7.34667	7.26389			-31.4	959.704	-24.2	633345	52831.4	21683.6
2014-08-01 15:02:59	26.84	35.258	6.56333	11.1233	5.521	2.69516	4.297	7.13889	5448.57			3223.33		399576	424415	35299.7
2014-08-01 16:02:59	27.5346	35.2965	6.52292	18.5138	5.85393	2.48746	2.43283	6.18981	6182.45		-76.3	0	-107	31355.2	348378	381337
2014-08-01 17:02:59	27.4163	35.277	6.56748	19.9221	5.94237	2.81163	4.51667	5.65278	4674.97		-71.4	1129.99	-44.9	452327	453223	276492
2014-08-01 18:02:59	26.8629	35.1696	6.5935	17.3989	5.86496	3.77195	1.9975	5.26389	4787.67		-73.6	966.19	-362	95315.6	568831	16883.7
2014-08-01 19:02:59	26.7357	35.3593	6.62222	18.9631	5.96864	4.99593	13.2345	4.93556	3731.26	39.6276	-71.2	800.057	-328	1.67975e+06	65642.9	12472.1
2014-08-01 20:02:59	26.8754	34.8675	6.6755	113.59	6.2115	5.99813	1.16667	3.83333	2917.8	20.0049	-70.9	929.69	-126	231838	6454.19	84314.8	0.0380166	0.0248584	0.0496528	0.0377868
2014-08-01 21:02:59	26.7296	34.7922	6.68898	113.399	6.21596	6.59478	6.37283	2.17593	2375.7	11.3781	-69.7	708.006	-79.9	2.68537e+06	6599.98	69814.2	0.0111905	0.0042113	0.01874	0.0137198
2014-08-01 22:02:59	26.6733	34.7895	6.684	112.66	6.18148	6.71631	5.27	2.28247	2357.22	6.53375	-66.5	670.534	-61.2	2.76591e+06	661973	67741.6	0.00573819	0.00228912	0.00940337	0.00681532
2014-08-01 23:02:59	26.6814	34.9375	6.645	11.1236	6.36444	6.21746	13.3857	2.93519	2812.16	7.19082	-68.8	596.537	-40.8	2.44137e+06	651683	7831.68	0.00820248	0.0043061	0.0141091	0.0104352
2014-08-02 00:02:59	26.5872	35.8836	6.58954	14.2482	5.72217	5.18517	19.675	2.46296	3328.87	9.08588	-69.7	634.749	-31.4	179352	61287.7	11697.3	0.0093175	0.00406314	0.0183702	0.0137664
2014-08-02 01:02:59	26.5236	35.2182	6.53393	99.4961	5.46177	4.49618	17.72	3.16667	3799.75	10.7944	-70.1	742.418	-24.1	1.1116e+06	57992	15623.3	0.014787	0.00833232	0.0268254	0.0202041
2014-08-02 02:02:59	26.4845	35.122	6.55851	1.66444	5.52833	3.23263	6.2725	2.36111	3925.93	10.4029	-69.7	831.458	-21.3	65623.3	53479	1956.94	0.0106734	0.00443266	0.019384	0.0142703
2014-08-02 03:02:59	26.396	35.1415	6.55611	11.1633	5.56778	2.82427	4.64167	2.44975	3415.79	10.6	-70.9	782.694	-18.4	4564.83	463641	26673.8	0.011252	0.00487672	0.0199758	0.0145857
2014-08-02 04:02:59	26.3675	35.1825	6.537	99.6452	5.48451	2.72571	1.946	2.2963	3185.2	9.79626	-69.4	795.566	-16.7	411717	436948	292767	0.00968416	0.00389133	0.0159796	0.0114788
2014-08-02 05:02:59	26.4478	35.228	6.51199	98.1139	5.39543	3.5536	4.76467	2.32874	3464.15	10.0113	-69.4	818.119	-15.4	567427	5855.56	22129.4	0.010061	0.00411085	0.0175664	0.0128102
2014-08-02 06:02:59	26.3495	35.1485	6.52522	97.9173	5.39113	3.9595	11.995	2.28333		10.3076	-68.4	856.109	-14.5	154829	5762.64	153712	0.0102582	0.0040941	0.0200763	0.0149765
2014-08-02 07:02:59	26.3444	35.7422	6.57351	11.1989	5.57251	5.14642	14.7167	2.18556		10.406	-68.6	850.43	-13.4	176940	611271	118444	0.00997879	0.00377585	0.019556	0.0146151
2014-08-02 08:02:59	26.1867	34.8667	6.61435	13.6283	5.73179	6.19349	12.8433	2.47685	2725.19	9.13261	-67.6	754.656	-12.3	2.42627e+06	65897.2	78817.8	0.00947033	0.00415624	0.0174126	0.0127444
2014-08-02 09:02:59	26.2476	34.7525	6.64115	17.8595	5.96298	6.89444	1.66617	4.27315		7.26612	-64.6	669.808	-12	288754	666617	6397.86	0.013257	0.00923491	0.0169021	0.0133391
2014-08-02 10:02:59	26.3725	34.7585	6.64478	18.3484	5.97541	7.18163	6.1615	5.89352		6.64587	-64.4	614.993	-11	387954	678472	51244	0.0207422	0.0155882	0.0206177	0.0209119
2014-08-02 11:02:59	26.4189	34.9181	6.58698	14.2856	5.74751	6.84178	17.6335	7.93519	3426.94	8.96148	-67	607.993	-11.1	285245	6657.27	6414.73	0.0625784	0.0417244	0.041374	0.0622757
2014-08-02 12:02:59	26.4684	35.4511	6.54552	11.5849	5.58651	5.82625	22.715	8.91237	3462.45	11.8757	-68.8	687.097	-11	2.19471e+06	638377	91338	0.12346	0.0737612	0.0654713	0.121749
2014-08-02 13:02:59	26.6688	35.9956	6.54447	15.9778	5.75421	4.56133	2.18317	7.86575	4158.28	12.8506	-70.2	763.277	-10.9	1.41596e+06	591752	137963	0.0936156	0.0628399	0.0583023	0.0892251
2014-08-02 14:02:59	27.1131	35.2463	6.49944	16.4644	5.78344	3.56552	11.4267	7.36111		16.3674	-70.7	818.652	-11.1	83518.8	561892	167823	0.104467	0.073279	0.0777799	0.104683
2014-08-02 15:02:59	27.4113	35.2996	6.48349	15.9984	5.72892	2.97294	4.33833	7.81944	5597.34	24.1924	-74.5	929.168	-39.9	526351	495619	23495.8	0.188964	0.127402	0.119026	0.180858
2014-08-02 16:02:59	27.8429	35.3699	6.47511	16.1922	5.69633	2.62878	1.89833	7.63889	5476.25	25.8328	-76.7	1101.83	-17.4	37712.7	43792.4	325923	0.191084	0.130971	0.119641	0.178538
2014-08-02 17:02:59	27.6424	35.364	6.46549	14.3287	5.61243	2.61463	2.71983	8.43556	4878.15	27.1172	-75	1071.89	-14.4	363127	39783	332632	0.265512	0.167921	0.140529	0.24843
2014-08-02 18:02:59	27.8373	35.2945	6.46544	14.8667	5.65268	3.1523	5.68783	8.74747	4563.29	20.2556	-74.5	1111.31	-13	617677	519588	21126.7	0.216421	0.131961	0.107313	0.202798
2014-08-02 19:02:59	26.9491	35.1825	6.49149	15.5463	5.75167	4.1945	12.89	7.375		17.745	-75	1042.7	-11.9	1.19722e+06	582486	147229	0.114795	0.0804355	0.0856245	0.115249
2014-08-02 20:02:59	27.2951	35.2351	6.56949	11.7383	6.334	5.28749	11.7587	6.43519	2987.44	11.4627	-74.2	931.418	-10.8	1.85915e+06	61744.2	11267.8	0.0502015	0.0372131	0.0447731	0.0507379
2014-08-02 21:03:00	27.1888	34.9573	6.68489	114.283	6.19543	6.82858	7.3235	4.61575	2645.37	10.8775	-72.1	735.617	-10.2	235591	648423	81292.9	0.0249793	0.0180086	0.030815	0.026104
2014-08-02 22:03:00	27.6822	34.93	6.6135	113.836	6.19952	6.49339	4.88333	3.13426		9.67147	-70.7	677.236	-9.86	2.61847e+06	658218	71497.5	0.0129603	0.00723588	0.0188634	0.0140498
2014-08-02 23:02:59	27.5467	34.9453	6.645	113.149	6.15499	6.41394	7.64567	2.87963	2628.99	9.09683	-70.6	659.955	-9.79	2.56694e+06	65673.8	7311.24	0.0109738	0.00565385	0.0171312	0.0127066
2014-08-03 00:02:59	26.8926	35.4291	6.56122	19.76	5.95256	5.76731	14.2167	2.72222	3433.42	9.26602	-71.6	679.649	-9.86	2.1569e+06	63745.9	92669.1	0.0105211	0.00511856	0.0186748	0.0138681
2014-08-03 01:02:59	26.7113	35.1741	6.49346	12.2889	5.59494	4.77393	16.9468	2.55556	3524.58	13.9288	-74.2	513.608	-11.4	1.54456e+06	597588	132127	0.0161316	0.00733197	0.0309151	0.0231449
2014-08-03 02:02:59	26.6468	35.1529	6.49451	1.979	5.53944	3.86669	1.84283	2.31944	3473.89	13.9297	-73.5	816.616	-11.1	14461.7	574918	154797	0.0148476	0.00603789	0.0233847	0.0167467
2014-08-03 03:02:59	26.6185	35.1833	6.51599	12.5622	5.62251	3.35167	4.25667	2.7963		12.3614	-73.2	802.077	-10.9	717419	549718	179997	0.0152686	0.00763739	0.0253217	0.0184306
2014-08-03 04:02:59	26.536	35.156	6.49151	11.3459	5.56544	3.16474	2.87	3.55556	3923.79	12.3635	-73	764.99	-11.1	619896	529986	199729	0.0199109	0.0123445	0.0295667	0.0220967
2014-08-03 05:02:59	26.525	35.2489	6.475	99.3651	5.45252	3.25682	3.52517	2.78737	4172.65	15.0131	-73.6	804.211	-11.4	667156	54423.4	189292	0.0190175	0.00948155	0.0312488	0.0226208
2014-08-03 06:02:59	26.4576	35.194	6.46451	98.8148	5.43247	3.77228	7.45	2.74747	3851.52	16.9781	-73.3	861.879	-11.4	95668.6	571749	157966	0.0215404	0.0105809	0.0378955	0.0277757
2014-08-03 07:02:59	26.485	35.8222	6.55	1.32667	5.51354	4.69265	12.4772	4.19444	3589.19	14.524	-72.7	892.251	-10.8	149530	5958.57	134634	0.029818	0.0205723	0.044031	0.0352078
2014-08-03 08:02:59	26.4834	35.2697	6.52551	12.5556	5.63733	5.67113	1.13333	5.58333	3115.16	12.561	-72.5	776.943	-10.4	296823	633254	96461.4	0.0411883	0.0309672	0.041308	0.0399292
2014-08-03 09:02:59	26.3297	34.9143	6.56256	15.2155	5.82155	6.39496	7.748	7.91237	2926.11	10.7986	-71.5	739.803	-9.74	255587	656149	73565.8	0.0779521	0.0520908	0.0501798	0.0761169
2014-08-03 10:02:59	26.2285	34.835	6.57911	16.5763	5.89178	6.8111	2.93517	8.35648	2999.99	8.98424	-69.4	660.846	-9.51	2.82983e+06	663878	65837.1	0.0726885	0.0463796	0.0409015	0.0694724
2014-08-03 11:02:59	26.4749	34.944	6.52349	16.2587	5.85243	6.77125	4.91683	7.99537		9.00932	-69.4	633.604	-9.47	28384.7	663123	66592.6	0.0643537	0.0426535	0.0395973	0.0618773
2014-08-03 12:02:59	26.5881	35.8854	6.46849	13.4189	5.67443	6.14228	13.775	7.55556		12.4614	-72.1	662.604	-10.4	239365	649464	8251.29	0.0810435	0.055951	0.0579328	0.0807713
2014-08-03 13:02:59	26.6441	35.1246	6.49152	15.5922	5.75921	5.6954	21.4587	7.83796	3566.86	13.7346	-73	785.573	-9.96	1.72533e+06	6848.27	12136.7	0.100818	0.0678536	0.0691732	0.101483
2014-08-03 14:02:59	26.98	35.2356	6.46699	17.5158	5.85328	4.83117	15.296	7.48148	4628.31	15.685	-73.9	787.433	-10.5	18795.3	578248	151468	0.103743	0.0720696	0.0754826	0.103878
2014-08-03 15:02:59	27.2221	35.2655	6.443	18.4511	5.88144	3.29565	7.4215	6.92778	5376.12	17.1472	-74.2	914.752	-10.9	68622.4	54226.6	187688	0.0946507	0.0684373	0.0758624	0.0943749
												966.012

## Sheet: Hinchbrook Mangrove
Date/Time	Temperature (°C)	Salinity	pH (NBS)	DO(%)	DO mg/L	Depth (m)	Current velocity (cm/s)	Windspeed (m/s)	Rn (dpm/m3)	Rn Unc (dpm/m3)	CH4 (nM)	d13C-CH4	pCO2 (uatm)	d13C-CO2	Water Volume (m3)	Water area (m2)	Exposed area (m2)	Flux CH4 (RC01) (mmol/m2/d)	Flux CH4 (W92) (mmol/m2/d)	Flux CH4 (BO04) (mmol/m2/d)	Flux (HO14) (mmol/m2/d)
2014-07-16 14:30:29	22.2527	35.3457	6.21133	92.4567	5.46867	5.08088	28.4694	3.16667	3862.09	421.518	63.9073	-78.5477	2363.2	-14.6049	4.63364e+06	2.79947e+06	780079	0.0866798	0.0494994	0.196099	0.142064
2014-07-16 15:30:29	21.9202	35.1872	6.08817	86.7467	5.16067	4.68176	9.94127	#VALUE!	4353.51	449.771	71.8328	-78.1211	2820.08	-15.3125	3.58043e+06	2.77341e+06	806143	0.0793519	0.0375109	0.174253	0.119368
2014-07-16 16:30:29	21.9368	35.1145	6.05017	84.735	5.04317	4.38244	2.03393	2.61574	4433.29	453.975	72.6749	-78.3316	3027.62	-15.7062	2.80392e+06	2.70927e+06	870286	0.0799211	0.0375061	0.152944	0.09957
2014-07-16 17:30:29	21.9198	35.0502	6.03383	83.36	4.963	4.10167	3.38507	3.67593	4251.33	445.854	75.5784	-78.206	3080.65	-15.783	2.11634e+06	2.4962e+06	1.08335e+06	0.122138	0.0779921	0.216012	0.15023
2014-07-16 18:30:29	21.6122	35.0167	6.0065	83.0617	4.97583	3.93383	2.0879	4.03704	4782.41	474.346	77.9422	-77.9069	3247.27	-16.0511	1.73692e+06	2.23632e+06	1.34323e+06	0.140872	0.0949617	0.233981	0.165333
2014-07-16 19:30:29	21.362	34.9702	5.99133	83.1217	5.0045	4.04265	3.93707	3.41667	5121.43	492.169	73.7695	-77.75	3331.69	-16.3561	1.98051e+06	2.41532e+06	1.16423e+06	0.10504	0.0628032	0.202167	0.136155
2014-07-16 20:30:29	21.3017	34.9882	5.99233	84.0933	5.06433	4.38031	7.11667	3.52778	4929.85	482.966	77.8014	-77.762	3237	-16.1051	2.80041e+06	2.7015e+06	878055	0.117334	0.072559	0.230075	0.158799
2014-07-16 21:30:29	21.337	35.1003	6.04817	83.15	5.00183	4.82011	15.1919	3.68519	4327.21	452.09	75.2708	-78.0574	2744.18	-15.3255	3.94532e+06	2.7834e+06	796155	0.119817	0.0765432	0.244653	0.173385
2014-07-16 22:30:29	21.3587	35.2495	6.14883	86.7333	5.21	5.2765	20.3165	2.58333	3805.35	423.382	71.7296	-78.3429	2147.68	-14.2376	5.14924e+06	2.81279e+06	766757	0.0768064	0.035506	0.190102	0.131914
2014-07-16 23:30:29	21.381	35.3945	6.26667	89.895	5.3965	5.64441	23.4604	2.40741	3170.1	385.636	61.1729	-78.5999	1672.59	-13.286	6.1207e+06	2.83984e+06	739711	0.0610741	0.025969	0.156305	0.109297
2014-07-17 00:30:29	21.39	35.4508	6.38633	92.9083	5.5745	5.96399	24.217	3.06019	2957.12	372.855	52.2368	-78.7029	1242.54	-12.1817	6.99097e+06	2.85401e+06	725544	0.0665876	0.0367831	0.152082	0.107688
2014-07-17 01:30:29	21.4432	35.4602	6.50933	96.5417	5.78633	6.12934	11.5606	4.68056	2965.06	373.2	44.7296	-78.7644	968.668	-11.2028	7.46312e+06	2.8616e+06	717951	0.0979975	0.0709809	0.161232	0.122993
2014-07-17 02:30:29	21.433	35.4575	6.49483	96.6717	5.795	5.85771	38.433	4.5	3198.38	388.048	43.6118	-78.6674	1141.93	-11.8664	6.69921e+06	2.84977e+06	729783	0.0897599	0.0640017	0.174292	0.133616
2014-07-17 03:30:29	21.3447	35.3898	6.28933	91.0617	5.46733	5.3602	30.7065	4.31481	3639.05	414.166	51.0866	-78.3887	1927.13	-13.852	5.36961e+06	2.81922e+06	760328	0.098982	0.0692448	0.195849	0.146804
2014-07-17 04:30:29	21.2198	35.2793	6.1345	85.2933	5.138	5.0321	12.6296	3.87037	4227.96	447.766	56.9935	-78.0531	2478.22	-14.7809	4.50526e+06	2.79577e+06	783783	0.0952013	0.0626679	0.186356	0.132438
2014-07-17 05:30:29	21.0898	35.2217	6.068	82.045	4.95483	4.66375	8.54833	4.23148	4583.64	467.723	60.0321	-77.8983	2789	-15.2089	3.53326e+06	2.7711e+06	808451	0.113865	0.0788723	0.203925	0.147946
2014-07-17 06:30:29	21.003	35.1865	6.03267	79.8233	4.83133	4.33158	5.57027	4.83796	4548.76	466.206	61.5264	-77.8983	2938.69	-15.4391	2.67536e+06	2.68653e+06	893025	0.142689	0.104518	0.228064	0.175132
2014-07-17 07:30:29	20.9647	35.1577	6.00767	78.7867	4.7725	4.14743	1.98157	5.03704	4475.71	462.371	62.3077	-77.9891	3057.68	-15.5983	2.22219e+06	2.55638e+06	1.02317e+06	0.155295	0.114848	0.226733	0.17792
2014-07-17 08:30:29	21.1087	35.1587	6.00367	78.1033	4.71533	4.16218	2.7141	4.51389	4358.44	455.555	62.7662	-78.0866	3067.55	-15.6099	2.25718e+06	2.57204e+06	1.00751e+06	0.130901	0.0934387	0.210924	0.155091
2014-07-17 09:30:29	21.247	35.1735	6.01117	78.3017	4.717	4.27129	2.43133	4.26852	4327.97	452.404	63.3594	-77.9178	3026.06	-15.4435	2.52364e+06	2.65691e+06	922636	0.121766	0.0847308	0.201631	0.144269
2014-07-17 10:30:29	21.6568	35.2122	6.036	79.895	4.77633	4.50991	4.51317	4.11111	4033.54	432.967	61.2735	-77.9186	2944.2	-15.2925	3.13128e+06	2.74798e+06	831570	0.112559	0.0767967	0.193155	0.138268
2014-07-17 11:30:29	22.1758	35.247	6.06467	80.965	4.79033	4.8477	8.4405	3.96759	3899.73	423.372	59.0932	-77.9853	2815.87	-15.0324	4.01799e+06	2.78565e+06	793903	0.104701	0.0699488	0.186568	0.134934
2014-07-17 12:30:29	22.5072	35.3157	6.12317	84.0467	4.946	5.10031	11.346	4.21759	3625.76	406.188	56.3758	-78.1571	2432.55	-14.4547	4.68532e+06	2.79987e+06	779679	0.110095	0.0761228	0.188828	0.141533
2014-07-17 13:30:29	22.786	35.3845	6.19567	87.3133	5.11	5.32956	12.9882	2.05556	3356.64	389.28	54.4446	-78.4186	2087.7	-13.9173	5.28888e+06	2.81678e+06	762771	0.0501649	0.0182834	0.112757	0.0806589
2014-07-17 14:30:29	22.9157	35.4347	6.25217	90.4033	5.28133	5.43157	9.4988	1.93519	3524.91	397.82	53.4112	-78.6868	1876.21	-13.5403	5.55715e+06	2.82506e+06	754495	0.0471948	0.0159094	0.100489	0.071658
2014-07-17 15:30:29	23.0783	35.3915	6.21	89.8317	5.23	5.06576	24.6763	3.03704	3927.43	421.412	52.8207	-78.4181	2386.42	-14.5261	4.59379e+06	2.79846e+06	781089	0.0705433	0.0392496	0.151845	0.11115
2014-07-17 16:30:29	22.6348	35.2503	6.07567	84.4667	4.96133	4.77289	4.60463	4.39815	4245.89	441.097	53.5069	-77.946	2867.64	-15.3441	3.82019e+06	2.78181e+06	797739	0.110858	0.0782319	0.173061	0.1305
2014-07-17 17:30:29	22.4353	35.2473	6.04	82.1083	4.843	4.62366	3.43323	4.93981	4300.97	443.538	55.5734	-77.9654	2920.27	-15.3598	3.42727e+06	2.76901e+06	810542	0.139379	0.102332	0.196173	0.158289
2014-07-17 18:30:29	22.2208	35.2217	6.024	81.2633	4.808	4.40479	4.57643	4.93056	4385.58	448.984	58.7681	-78.3571	2970.03	-15.3712	2.86011e+06	2.72042e+06	859132	0.147531	0.107874	0.211927	0.171687
2014-07-17 19:30:29	21.8735	35.1977	6.00017	79.265	4.72067	4.23773	1.94833	4.34259	4356.55	448.86	58.2565	-78.0866	3028.52	-15.556	2.44068e+06	2.63481e+06	944741	0.116173	0.0815124	0.183322	0.133714
2014-07-17 20:30:29	21.743	35.1925	5.99	78.5017	4.68383	4.29987	2.65593	4.47222	4520.18	458.708	57.0065	-77.9354	3027.66	-15.5665	2.59514e+06	2.67254e+06	907016	0.118789	0.0844265	0.186345	0.138338
2014-07-17 21:30:29	21.6618	35.206	5.99983	79.9983	4.78333	4.54097	4.54557	3.56481	4669.81	467.388	61.462	-78.0229	2922.08	-15.3584	3.21168e+06	2.75518e+06	824371	0.0978711	0.0621185	0.170533	0.123028
2014-07-17 22:30:29	21.6275	35.2482	6.0445	82.2133	4.91683	4.82448	7.8231	2.23611	4715.42	470.449	65.9702	-78.2091	2541.42	-14.9056	3.95659e+06	2.78448e+06	795068	0.0785387	0.0405267	0.164432	0.112686
2014-07-17 23:30:29	21.6277	35.3097	6.09083	82.8067	4.94967	5.09326	12.7353	3.33796	4558.51	462.798	69.3806	-78.3478	2390.31	-14.486	4.66666e+06	2.79954e+06	780013	0.103374	0.0623394	0.203527	0.146762
2014-07-18 00:30:29	21.5977	35.362	6.15933	84.395	5.04767	5.38699	13.8527	5.85648	4292.54	448.909	65.8028	-78.4321	1981.56	-13.7581	5.43994e+06	2.82142e+06	758131	0.224103	0.167372	0.295333	0.270484
2014-07-18 01:30:29	21.58	35.4023	6.22217	86.6333	5.1815	5.59025	9.5585	4.5787	3847.51	424.464	60.0345	-78.4322	1725.23	-13.2957	5.97595e+06	2.83688e+06	742670	0.131545	0.0941033	0.21475	0.164765
2014-07-18 02:30:29	21.6073	35.4273	6.26717	88.415	5.28567	5.68879	4.66667	3.93519	3589.89	409.782	55.5244	-78.5348	1581.01	-12.9961	6.23785e+06	2.84302e+06	736532	0.0956875	0.0636596	0.166241	0.116667
2014-07-18 03:30:29	21.5695	35.4203	6.263	88.595	5.30033	5.55387	19.798	4.19444	3673.08	414.868	53.3828	-78.4602	1661.54	-13.176	5.88011e+06	2.83405e+06	745500	0.101379	0.0698276	0.189391	0.140995
2014-07-18 04:30:29	21.397	35.3493	6.17083	86.3283	5.18033	5.20208	15.7658	4.97685	4084.62	439.726	55.1237	-78.2166	2102.27	-14.0893	4.95344e+06	2.80702e+06	772534	0.135239	0.0997656	0.219716	0.175019
2014-07-18 05:30:29	21.1988	35.3017	6.0855	82.8383	4.99017	4.97072	9.08153	5.74074	4446.24	459.984	58.6017	-77.9981	2445.54	-14.6715	4.34315e+06	2.79227e+06	787285	0.193376	0.143074	0.254348	0.231025
2014-07-18 06:30:29	21.051	35.2702	6.03417	79.8867	4.82633	4.67709	8.36833	7.23148	4825.99	479.96	61.686	-77.9791	2665.63	-14.9346	3.56805e+06	2.77329e+06	806265	0.337446	0.235714	0.325167	0.383618
2014-07-18 07:30:29	20.9752	35.2488	5.99033	78.2983	4.73933	4.37076	5.44913	6.67593	5023.62	489.933	63.0836	-77.9655	2898.5	-15.2711	2.77444e+06	2.70387e+06	875678	0.283792	0.205372	0.306055	0.323743
2014-07-18 08:30:29	21.0142	35.2263	5.96633	76.51	4.6295	4.14074	3.3942	6.53704	4963.16	485.85	63.6579	-77.8394	3048.19	-15.4456	2.20696e+06	2.54656e+06	1.03299e+06	0.269591	0.198108	0.297382	0.303635
2014-07-18 09:30:29	21.228	35.2262	5.96	76.7483	4.62483	4.04966	2.31663	6.28241	4731.65	473.078	64.0857	-77.817	3117.54	-15.5335	1.99342e+06	2.43896e+06	1.14059e+06	0.233982	0.174845	0.276437	0.261018
2014-07-18 10:30:29	21.475	35.2397	5.96483	80.425	4.82317	4.13653	3.77977	6.97222	4839.24	475.993	59.3991	-78.2847	3032.38	-15.3005	2.19719e+06	2.54114e+06	1.03842e+06	0.254538	0.186716	0.27462	0.284194
2014-07-18 11:30:29	22.0273	35.281	5.99217	80.5483	4.7855	4.34044	4.18227	5.40741	4692.83	464.718	61.3536	-78.3713	2944.14	-15.1613	2.69745e+06	2.69163e+06	887926	0.185685	0.136343	0.2391	0.211381
2014-07-18 12:30:29	22.453	35.3222	6.03717	81.865	4.82233	4.63588	7.4825	6.13426	4390.2	448.625	59.8256	-78.4459	2689.65	-14.8097	3.45993e+06	2.76855e+06	811005	0.228574	0.169819	0.264018	0.258726
2014-07-18 13:30:29	22.3135	35.367	6.09067	85.3867	5.04233	4.98207	13.0413	6.47222	3682.64	410.829	56.508	-78.6609	2280.16	-14.2256	4.37309e+06	2.793e+06	786549	0.24397	0.178406	0.269663	0.281044
2014-07-18 14:30:29	22.254	35.4087	6.15083	87.3667	5.1625	5.2695	10.7376	4.21759	3461.71	398.326	54.288	-78.7025	2038.95	-13.7585	5.13091e+06	2.81202e+06	767527	0.137734	0.100515	0.207645	0.170764
2014-07-18 15:30:29	22.4685	35.4398	6.18867	90.1267	5.3045	5.3601	3.55053	2.81019	3631.15	408.454	47.0728	-78.4151	1905.9	-13.6975	5.36917e+06	2.81924e+06	760310	0.0559079	0.0285914	0.104976	0.0700517
2014-07-18 16:30:29	22.4762	35.4377	6.18517	90.3617	5.31617	5.23143	9.29517	2.61574	3764.35	416.01	48.3658	-78.3189	1955.13	-13.8285	5.03078e+06	2.80905e+06	770501	0.0535872	0.0254984	0.111872	0.0772286
2014-07-18 17:30:29	22.496	35.4065	6.143	89.7417	5.27717	5.06613	5.06817	2.98148	3828.84	419.738	46.4604	-78.0412	2203.04	-14.4227	4.59522e+06	2.79755e+06	781999	0.0591659	0.0321639	0.111159	0.0763391
2014-07-18 18:30:29	22.1507	35.3295	6.07183	87.0633	5.15483	4.92557	6.09147	3.62037	4158.46	439.637	46.7032	-77.7624	2462.75	-14.8853	4.22384e+06	2.78986e+06	789696	0.0730293	0.04603	0.132466	0.0931206
2014-07-18 19:30:29	21.7102	35.279	6.02033	84.0617	5.01867	4.73155	4.39087	2.88889	3947.56	429.664	48.8106	-77.6229	2623.42	-15.2281	3.71112e+06	2.77894e+06	800612	0.0579835	0.0301608	0.115122	0.0762521
2014-07-18 20:30:29	21.4553	35.275	5.99267	81.36	4.88	4.58718	3.8824	3.26852	3737.32	419.277	45.385	-77.4205	2734.12	-15.4457	3.33181e+06	2.76411e+06	815442	0.05936	0.033866	0.113382	0.0749576
2014-07-18 21:30:29	21.2948	35.2675	5.98	78.8167	4.74217	4.54989	3.6388	2.32407	3812.94	424.486	43.443	-77.403	2745.42	-15.42	3.23416e+06	2.75925e+06	820305	0.0415802	0.0170982	0.0870814	0.057216
2014-07-18 22:30:29	21.172	35.2762	5.99483	78.0467	4.706	4.68602	3.4	4.33333	3999.89	435.289	43.0748	-77.2651	2669.23	-15.2868	3.59108e+06	2.7755e+06	804050	0.0529576	0.0288855	0.107929	0.0710886
2014-07-18 23:30:29	21.1252	35.301	6.0135	78.7783	4.75567	4.78783	3.7933	5.25	4484.62	461.476	38.7099	-77.0501	2419.22	-15.1752	3.85963e+06	2.78273e+06	796821	0.107491	0.0801664	0.14914	0.124874
2014-07-19 00:30:29	21.1262	35.3223	6.03367	80.5467	4.86033	4.93704	8.255	4.51389	4429.84	458.692	40.4846	-77.17	2372.93	-15.0234	4.25415e+06	2.79049e+06	789063	0.0828207	0.0591165	0.141558	0.105408
2014-07-19 01:30:29	21.1475	35.346	6.0535	81.8667	4.93817	5.15577	9.77723	4.2963	4068.99	439.527	40.2307	-77.201	2251.93	-14.7944	4.83158e+06	2.80349e+06	776063	0.0771619	0.0538308	0.136831	0.100647
2014-07-19 02:30:29	21.1152	35.371	6.08967	83.1967	5.02033	5.33593	10.474	4.60185	3662.95	417.242	38.8792	-77.3446	2039.15	-14.4334	5.30563e+06	2.81729e+06	762263	0.081741	0.0588146	0.139634	0.105197
2014-07-19 03:30:29	21.088	35.3998	6.13717	84.895	5.12017	5.47419	5.9019	5.08796	3463.95	405.81	37.2504	-77.381	1842.45	-14.0562	5.66933e+06	2.82846e+06	751090	0.0938022	0.0690006	0.138244	0.111729
2014-07-19 04:30:29	21.0637	35.4102	6.14517	86.3617	5.212	5.39197	9.3475	5.28241	3684.44	418.292	37.3824	-77.4442	1856.06	-14.0744	5.45301e+06	2.82183e+06	757719	0.100483	0.0746105	0.148045	0.122908
2014-07-19 05:30:29	21.028	35.3788	6.10533	85.8367	5.18533	5.24962	6.2595	5.43519	4020.61	437.71	42.7446	-77.6715	2076.75	-14.4015	5.07866e+06	2.81037e+06	769183	0.123111	0.0910483	0.170323	0.145804
2014-07-19 06:30:29	20.9558	35.3628	6.06667	85.5817	5.17983	5.04129	11.6067	5.07407	4161	445.939	49.0717	-77.5695	2273.63	-14.5922	4.52951e+06	2.79637e+06	783184	0.12353	0.0913026	0.195605	0.156978
2014-07-19 07:30:29	20.8768	35.3265	6.01167	83.075	5.0365	4.75184	8.5189	4.90741	3810.89	426.772	48.5633	-77.3702	2494.56	-14.9565	3.7649e+06	2.77963e+06	799920	0.115976	0.0848919	0.185444	0.145834
2014-07-19 08:30:29	20.7942	35.2878	5.96783	80.585	4.893	4.45935	4.95103	4.8287	3917.94	431.942	47.7659	-77.2476	2683.06	-15.3401	3.00078e+06	2.73491e+06	844642	0.10467	0.0760696	0.169691	0.12766
2014-07-19 09:30:29	20.7248	35.27	5.9315	80.4733	4.8885	4.18411	4.60967	6.375	4501.51	463.678					2.31111e+06	2.5875e+06	992050
2014-07-19 10:30:29	20.8147	35.2577	5.941	84.0183	5.09717	4.05264	1.51033	8.55093	4817.24	478.83					2.00028e+06	2.44306e+06	1.1365e+06
2014-07-19 11:30:29	21.0657	35.2548	5.96233	86.2667	5.21183	4.0806	2.14337	7.64352	3999.6	429.992					2.06518e+06	2.47882e+06	1.10073e+06
2014-07-19 12:30:29	21.3088	35.281	5.98467	91.1083	5.482	4.27549	5.49607	7.11111	3223.15	386.755					2.53537e+06	2.65445e+06	925101
2014-07-19 13:30:29	21.7065	35.3445	6.04083	95.06	5.6765	4.59443	9.4345	5.95833	3438.21	398.275					3.35165e+06	2.76224e+06	817307
2014-07-19 14:30:29	21.9402	35.392	6.082	94.5183	5.6185	4.94934	14.4441	3.73611	3667.89	412.037					4.28658e+06	2.79124e+06	788306
2014-07-19 15:30:29	22.0573	35.4422	6.14833	95.8667	5.68083	5.29151	18.0495	3.98611	3523.4	403.905					5.18878e+06	2.81385e+06	765697
2014-07-19 16:30:29	21.9497	35.4748	6.20217	96.9183	5.7545	5.54285	9.29983	4.59722	3553.5	406.056					5.85049e+06	2.8336e+06	745952
2014-07-19 17:30:29	21.8942	35.4727	6.20767	97.645	5.804	5.52298	10.0595	4.74074	3538.75	406.248					5.79806e+06	2.83211e+06	747441
2014-07-19 18:30:29	21.5862	35.4278	6.15667	95.5617	5.71417	5.38622	4.91833	3.78704	3426.15	401.041					5.43784e+06	2.82138e+06	758171
2014-07-19 19:30:29	21.4307	35.4237	6.145	94.69	5.67633	5.33543	4.75013	2.83333	3516.87	406.18					5.30432e+06	2.81723e+06	762322
2014-07-19 20:30:29	21.3127	35.3993	6.11183	93.87	5.6435	5.09633	15.824	2.4537	3919.44	429.833					4.67465e+06	2.79994e+06	779608
2014-07-19 21:30:29	21.1008	35.3268	6.02083	90.5667	5.46783	4.82322	3.5482	1.95833	4488.09	462.546					3.95321e+06	2.78461e+06	794936
2014-07-19 22:30:29	20.9553	35.3208	5.98733	88.5817	5.35917	4.69835	2.63717	2.67593	4673.97	472.356					3.6235e+06	2.77674e+06	802814
2014-07-19 23:30:29	20.8747	35.3277	5.97517	87.015	5.2745	4.60927	1.92283	4.57407	5230.64	501.142	56.3852	-77.39	2794.33	-15.5389	3.38937e+06	2.76784e+06	811708	0.119192	0.0856071	0.188556	0.13846
2014-07-20 00:30:29	20.7312	35.3125	5.96	85.6167	5.20517	4.64242	2.9755	5.46296	5201.27	500.691	57.8893	-77.4188	2894.1	-15.6814	3.47646e+06	2.77127e+06	808283	0.167659	0.125105	0.229897	0.193776
2014-07-20 01:30:29	20.6847	35.3198	5.976	86.2883	5.24933	4.83433	7.01883	5.31019	4787.6	479.622	56.5681	-77.2492	2751.01	-15.4846	3.98257e+06	2.78518e+06	794375	0.154732	0.115228	0.229183	0.188685
2014-07-20 02:30:29	20.7283	35.3658	6.02583	88.255	5.36133	5.0199	6.61813	4.86111	4348.22	457.545	53.6042	-77.2269	2454.5	-15.0428	4.47315e+06	2.79488e+06	784667	0.124365	0.0911368	0.200166	0.153836
2014-07-20 03:30:29	20.8028	35.406	6.07083	90.0517	5.46067	5.22258	8.66923	4.82407	3982.95	436.405	50.6451	-77.241	2197.65	-14.6236	5.00747e+06	2.80842e+06	771133	0.115768	0.0846799	0.189647	0.145449
2014-07-20 04:30:29	20.9233	35.4433	6.13567	92.2167	5.57883	5.42571	9.22847	3.81481	3701.88	419.81	47.9296	-77.3209	1906.21	-14.1151	5.54176e+06	2.82456e+06	754989	0.0780208	0.051048	0.149414	0.104388
2014-07-20 05:30:29	20.9178	35.4638	6.16517	93.1667	5.64017	5.43891	10.5303	4.72222	3496.52	408.883	43.4015	-77.2957	1776.08	-13.8884	5.5765e+06	2.82563e+06	753925	0.0964712	0.0696649	0.159541	0.12289
2014-07-20 06:30:29	20.8298	35.4242	6.10067	91.3467	5.5375	5.24829	9.44417	5.57407	4075.96	441.553	43.345	-77.1442	2058.62	-14.4961	5.07517e+06	2.8103e+06	769255	0.128548	0.0962406	0.181688	0.155976
2014-07-20 07:30:29	20.7252	35.4003	6.053	90.525	5.49867	5.07739	9.77923	6.83333	4750.63	477.98	47.9144	-77.1184	2279.92	-14.835	4.62486e+06	2.79843e+06	781119	0.225318	0.161746	0.242105	0.262259
2014-07-20 08:30:29	20.7036	35.3464	5.96726	86.654	5.26856	4.78663	8.88603	5.82407	7165.53	692.761	62.9643	-77.4479	2904.73	-15.3871	3.85673e+06	2.78188e+06	797672	0.223458	0.165497	0.284081	0.26716
2014-07-20 09:30:29	20.6675	35.3325	5.94633	83.1917	5.05817	4.4843	5.67847	4.71759	5124.17	498.231	67.8219	-77.4879	3100.71	-15.4654	3.06509e+06	2.74161e+06	837937
2014-07-20 10:30:29	20.633	35.2853	5.91767	78.6133	4.788	4.16154	5.7129	4.7963	4717.14	476.282					2.25817e+06	2.56091e+06	1.01864e+06
2014-07-20 11:30:29	20.7725	35.2962	5.91	80.7867	4.9065	3.95912	2.84167	5.5	4623.83	471.099	36.3106	-76.7166	3134.43	-17.4966	1.79164e+06	2.28639e+06	1.29317e+06	0.126362	0.0944514	0.151416	0.140881
2014-07-20 12:30:29	20.9403	35.2948	5.91617	82.3817	4.98433	3.97383	3.1709	5.65741	4744.24	475.537	52.6685	-77.2431	3231.32	-16.819	1.82375e+06	2.31429e+06	1.26526e+06	0.162973	0.121805	0.215254	0.187972
2014-07-20 13:30:29	21.2108	35.3372	5.94717	86.65	5.2195	4.19831	8.52427	4.68981	4779.54	475.259	61.0109	-77.4391	3090.58	-16.2915	2.34785e+06	2.5902e+06	989351	0.136787	0.0987579	0.226898	0.174745
2014-07-20 14:30:29	21.6645	35.3385	5.9845	90.865	5.42533	4.59569	11.5105	4.56481	4394.47	452.514	61.1884	-77.4196	2868.26	-15.9009	3.35557e+06	2.76033e+06	819220	0.132319	0.0947766	0.224824	0.172035
2014-07-20 15:30:29	21.9465	35.4168	6.06917	94.8583	5.63717	5.02504	17.9354	4.41667	4092.18	436.408	57.3375	-77.5118	2329.47	-15.0226	4.48649e+06	2.79567e+06	783881	0.11871	0.0838562	0.210709	0.160928
2014-07-20 16:30:29	21.7673	35.4955	6.1595	97.6883	5.81767	5.42224	22.747	3.43981	3911.14	429.983	54.6538	-77.8671	1838.32	-14.2173	5.53287e+06	2.82412e+06	755431	0.0818132	0.0501122	0.172909	0.124987
2014-07-20 17:30:29	21.2615	35.4645	6.20083	96.3833	5.79483	5.74424	16.4998	3.49074	3762.07	421.018	55.1437	-78.1631	1484.91	-13.0205	6.38723e+06	2.84553e+06	734017	0.0822339	0.0507256	0.169189	0.119518
2014-07-20 18:30:29	21.474	35.5168	6.2535	94.4333	5.65567	5.82643	8.4618	3.56944	3546.43	407.849	50.3854	-78.049	1351.28	-12.6596	6.60901e+06	2.84921e+06	730341	0.0773246	0.0484425	0.14469	0.100883
2014-07-20 19:30:29	21.4208	35.5365	6.22183	95.7733	5.739	5.65189	16.1367	3.21759	3477.94	403.913	48.4303	-77.9364	1556.32	-13.2879	6.13988e+06	2.84068e+06	738868	0.0657117	0.0382847	0.141221	0.0985916
2014-07-20 20:30:29	21.2497	35.494	6.15683	94.9967	5.71233	5.48595	8.52077	3.0463	3782.51	422.001	46.2717	-77.4704	1850.71	-14.1445	5.70037e+06	2.82933e+06	750223	0.0560527	0.0300682	0.119552	0.0808879
2014-07-20 21:30:29	21.0438	35.4505	6.077	92.63	5.59167	5.25537	17.0184	3.01389	4394.79	458.327	49.8074	-77.4758	2059.48	-14.4921	5.09367e+06	2.81109e+06	768463	0.0613677	0.0334301	0.141016	0.0972024
2014-07-20 22:30:29	20.8668	35.4067	5.98583	89.005	5.39233	4.88277	9.83243	2.65278	4815.11	481.397	54.6261	-77.3065	2510.63	-15.2452	4.11067e+06	2.78763e+06	791917	0.0594815	0.0287893	0.134563	0.0907274
2014-07-20 23:30:29	20.6265	35.3578	5.9065	84.5983	5.1485	4.60968	4.76767	3.77778	5045.24	493.866	59.9679	-77.2202	2912.08	-15.7176	3.39076e+06	2.76688e+06	812669	0.104655	0.0692368	0.182301	0.133196
2014-07-21 00:30:29	20.5552	35.3498	5.90117	84.1633	5.13333	4.48726	2.5818	4.81944	5000.11	491.867	63.3577	-77.5673	2947.4	-15.6703	3.07152e+06	2.74661e+06	832946	0.144623	0.105803	0.226678	0.170704
2014-07-21 01:30:29	20.5392	35.3302	5.90133	83.6083	5.098	4.52	1.9311	4.85648	4916.2	488.464	62.3353	-77.4622	2974.69	-15.6725	3.15659e+06	2.75306e+06	826493	0.143957	0.10557	0.221766	0.167394
2014-07-21 02:30:29	20.4877	35.3483	5.9135	83.3217	5.0845	4.69452	3.574	5.02778	5068.49	496.293	60.4228	-77.3649	2892.09	-15.5625	3.61364e+06	2.77577e+06	803777	0.147995	0.109482	0.227302	0.176628
2014-07-21 03:30:29	20.5032	35.3748	5.946	87.6217	5.34533	4.89614	4.9639	4.88426	5139.38	499.25	60.1038	-77.3566	2718.1	-15.2731	4.14601e+06	2.78838e+06	791175	0.139802	0.102691	0.223156	0.170106
2014-07-21 04:30:29	20.604	35.416	5.9945	89.4467	5.44667	5.14412	15.6743	4.6713	4860.71	484.261	65.6597		2403.01	-14.6627	4.80074e+06	2.80293e+06	776619	0.142724	0.10333	0.256554	0.193928
2014-07-21 05:30:29	20.7558	35.4448	6.06317	91.1667	5.53383	5.44724	16.6937	4.75	4407.68	459.883	65.6443		1992.44	-13.8471	5.59853e+06	2.82621e+06	753337	0.147128	0.107122	0.258647	0.19778
2014-07-21 06:30:29	20.8652	35.4675	6.10617	92.2067	5.58417	5.51271	10.13	4.98611	4413.84	461.811	59.3377		1833.56	-13.6377	5.77094e+06	2.83136e+06	748190	0.145304	0.107095	0.230336	0.181384
2014-07-21 07:30:29	20.6867	35.4487	6.04967	90.505	5.5015	5.25429	13.3734	4.2963	4839.11	487.071	57.0872		2158.77	-14.3477	5.09087e+06	2.81089e+06	768658	0.109169	0.0762035	0.204121	0.148698
2014-07-21 08:30:29	20.4297	35.4157	5.95067	86.26	5.26883	5.01185	8.24943	4.6713	5304.21	511.625	58.7417		2678.99	-15.1887	4.45181e+06	2.79458e+06	784973	0.126656	0.09168	0.21816	0.162799
2014-07-21 09:30:29	20.4568	35.3787	5.89517	84.51	5.15817	4.69904	7.4865	4.93519	5531.27	519.183	62.3569		3063.67	-15.6541	3.62599e+06	2.77473e+06	804825	0.148204	0.109073	0.241726	0.186836
2014-07-21 10:30:29	20.5842	35.3788	5.89117	84.935	5.174	4.35433	4.15957	4.5	5513.42	515.501	61.5883		3124.26	-15.7158	2.73352e+06	2.69418e+06	885374	0.126359	0.0900644	0.213214	0.155662
2014-07-21 11:30:29	20.7858	35.3848	5.90133	88.1967	5.3515	4.01507	4.30333	4.80093	5093.57	539.489	58.7443		3207.25	-15.9689	1.91888e+06	2.36941e+06	1.21014e+06	0.135138	0.0983896	0.214951	0.164877
2014-07-21 12:30:29	21.1167	35.4138	5.86817	79.3	4.784	3.83292	3.15863	5.06019	4870.45	766.603	62.283		3284	-16.0881	1.5282e+06	1.99172e+06	1.58784e+06	0.150026	0.111032	0.224441	0.177478
2014-07-21 13:30:29	21.1752	35.4093	5.81683	55.065	3.31167			5.31944	4776.3	762.629
2014-07-21 14:30:29	21.7942	35.5253	6.05933	75.5433	4.493			4.81019	2814.41	554.376
2014-07-21 15:30:29	22.5487	35.691	6.6025	105.565	6.19			3.81019	1714.14	403.482
2014-07-21 16:30:29	23.0412	35.7487	6.88117	122.807	7.139			2.51389	1546.39	379.011
2014-07-21 17:30:29	22.4827	35.6632	6.86883	119.058	6.99217			3.38426	897.275	282.806
2014-07-21 18:30:29	22.1238	35.5863	6.82317	116.088	6.86633			3.31481	960.284	296.823
2014-07-21 19:30:29	22.2523	35.566	6.83083	117.532	6.93733			3.18056	675.018	251.8
2014-07-21 20:30:29	22.1428	35.5513	6.83133	116.33	6.879			2.74537	506.166	214.92
2014-07-21 21:30:29	22.121	35.5767	6.82017	115.785	6.84867			3.01852	696.385	247.95
2014-07-21 22:30:29	22.1545	35.661	6.80517	116.108	6.863			2.70833	1113.07	323.797
2014-07-21 23:30:29	22.2165	35.6997	6.7605	113.075	6.67467			2.44907	1425.21	363.447
2014-07-22 00:30:29	22.1422	35.715	6.71033	109.002	6.439			2.52315	1720.89	400.36
2014-07-22 01:30:29	22.0355	35.7262	6.701	107.833	6.386			4.39352	1271.88	342.806
2014-07-22 02:30:29	22.1825	35.7757	6.69767	107.24	6.33167			4.78704	1356.42	352.383
2014-07-22 03:30:29	22.0592	35.7263	6.75683	111.697	6.61083			4.75	1171.8	329.613
2014-07-22 04:30:29	21.7565	35.6532	6.77633	112.702	6.70883			4.72222	1239.75	337.763
2014-07-22 05:30:29	21.7917	35.6967	6.77617	112.74	6.70633			4.72222	1192.93	333.712
2014-07-22 06:30:29	21.7835	35.5165	6.75387	112.145	6.67581			4.72222	1461.69	368.614
2014-07-22 07:30:29	21.9485	35.7018	6.68383	110.508	6.55467			4.72222	1636.11	391.396
2014-07-22 08:30:29	21.8618	35.6862	6.73483	112.023	6.65317			4.72222	1488.35	373.425
2014-07-22 09:30:29	21.8332	35.6015	6.64333	112.533	6.69167			4.72222	1616.08	385.009
2014-07-22 10:30:29	21.731	35.4765	6.69483	114.473	6.82483			4.72222	1044.72	313.434
2014-07-22 11:30:29	21.67	35.06	6.64	113.6	6.8			4.72222	892.043	287.035
2014-07-22 12:30:29	21.67	35.06	6.64	113.6	6.8			4.72222	807.144	273.573
2014-07-22 13:30:29	21.67	35.06	6.64	113.6	6.8			4.72222	563.932	224.798
2014-07-22 14:30:29	21.67	35.06	6.64	113.6	6.8			4.72222	843.981	272.257
2014-07-22 15:30:29	21.67	35.06	6.64	113.6	6.8			4.72222	1298.39	349.235
2014-07-22 16:30:29	21.67	35.06	6.64	113.6	6.8			4.72222	759.336	263.267
2014-07-22 17:30:29	21.67	35.06	6.64	113.6	6.8			4.72222	717.071	243.375

## Sheet: Seventeen Seventy Mangrove
Date/Time	Temperature (°C)	Salinity	pH (NBS)	DO(%)	DO mg/L	Depth (m)	Current velocity (cm/s)	Windspeed (m/s)	Rn (dpm/m3)	Rn unc (dpm/m3)	CH4 (nM)	d13C-CH4	pCO2 (uatm)	d13C-CO2	Water Volume (m3)	Water area (m2)	Exposed area (m2)	Flux CH4 (RC01) (mmol/m2/d)	Flux CH4 (W92) (mmol/m2/d)	Flux CH4 (BO04) (mmol/m2/d)	Flux (HO14) (mmol/m2/d)
2014-07-08 11:00:28	15.9012	38.2962	7.37067	96.2467	6.29583			2.61111	5484.72	553.823	45.866	-71.6821	1776.31	-16.5075				0.0422142	0.0196443	0.259428	0.196904
2014-07-08 12:00:28	16.7092	38.5345	7.31083	98.4417	6.333			2.61111	7264	650.461	50.1789	-71.0231	2092.76	-17.2147				0.0473644	0.022041	0.279758	0.213448
2014-07-08 13:00:28	17.7185	38.7087	7.27233	101.358	6.38567			2.61111	7985.16	682.503	50.9649	-71.051	2162.3	-17.1382				0.0493924	0.0229847	0.2777	0.213284
2014-07-08 14:00:28	18.4485	38.7687	7.25333	104.932	6.517			2.61111	8355.88	697.911	55.8301	-71.1001	2141.13	-17.0768				0.0553294	0.0257474	0.30018	0.231678
2014-07-08 15:00:28	18.542	38.3767	7.397	112.713	7.007			2.61111	6732.16	623.177	52.0355	-71.7664	1589.6	-16.124				0.0515397	0.0239839	0.278255	0.214902
2014-07-08 16:00:28	18.3153	37.7225	7.58883	116.042	7.274			1	4086.74	483.527	40.8249	-72.3431	938.833	-13.9557				0.0226215	0.00271358	0.17371	0.147838
2014-07-08 17:00:28	18.2017	37.0613	7.61783	116.847	7.36733			1	2637.97	388.711	27.0193	-74.6485	617.345	-11.7013				0.0145084	0.00174037	0.111672	0.0950205
2014-07-08 18:00:28	18.6423	36.1892	7.66317	115.685	7.27383			1	1645.2	307.031	12.377	-76.8641	391.523	-8.61314	180600	404144	1.29727e+06	0.00599983	0.000719715	0.0430268	0.0365731
2014-07-08 19:00:28	18.5963	36.1688	7.66583	114.377	7.20017	2.30976	26.6296	1	1469	290.133	8.48075	-77.0804	405.281	-8.65269	1.59879e+06	1.47318e+06	228234	0.00369892	0.000443708	0.0153426	0.0125378
2014-07-08 20:00:28	17.751	36.8145	7.5235	112.19	7.14683	2.08478	38.9085	1	2015.27	339.541	12.8634	-76.5499	546.883	-10.5828	1.26256e+06	1.39143e+06	309985	0.00613654	0.000736114	0.0316524	0.026101
2014-07-08 21:00:28	17.4	37.3035	7.43917	109.84	7.0215	1.74665	27.2332	1	2600.27	387.636	17.042	-73.5712	702.037	-12.1897	774492	1.15562e+06	545794	0.00847353	0.00101645	0.0414377	0.0338686
2014-07-08 22:00:28	17.0298	37.6387	7.40033	107.295	6.89183	1.412	15.2835	1	3300.28	436.312	20.5398	-72.1927	855.521	-13.2097	380993	815464	885947	0.0103726	0.00124426	0.0462607	0.0372686
2014-07-08 23:00:28	16.38	38.21	7.38	105.9	6.87	1.14706	10.6038	1	3720.36	464.029	22.0364	-71.5485	1045.95	-14.1236	165847	513035	1.18838e+06	0.0110224	0.0013222	0.0480123	0.0381972
2014-07-09 00:00:28						0.957733	10.2985	1	4596.69	515.315	24.3531	-70.7319	1330.79	-15.2892	72257.8	310408	1.391e+06	0.0123152	0.00147728	0.0568857	0.0455799
2014-07-09 01:00:28	16.2498	38.6847	7.01911	92.6467	6.01133	0.835528	6.6009	1	5302.27	555.589	24.8102	-70.1766	1659.07	-16.2611	38097.8	197396	1.50401e+06	0.0125338	0.0015035	0.053127	0.0420415
2014-07-09 02:00:28	16.0558	38.838	7.01367	90.8783	5.90883	0.84458	4.60647	1	5567.58	569.027	25.5196	-69.8292	1779	-16.6989	40719.7	205949	1.49546e+06	0.0128481	0.0015412	0.0492383	0.038259
2014-07-09 03:00:28	15.7813	38.7442	7.01933	92.65	6.057	1.11662	12.6325	1	5597.95	570.252	24.7281	-69.8316	1618.68	-16.3795	152668	480843	1.22057e+06	0.0123173	0.00147754	0.0589168	0.0469829
2014-07-09 04:00:28	15.4513	38.0578	7.15117	96.8333	6.40117	1.52931	23.6394	1	3967.14	477.244	21.7309	-70.6602	1117.04	-14.8139	508886	942068	759343	0.0105769	0.00126876	0.0576355	0.0464784
2014-07-09 05:00:28	15.4588	37.5247	7.25933	99.2333	6.577	1.87295	15.3332	1	2833.56	404.754	20.3646	-71.5868	800.952	-13.1393	946582	1.26198e+06	439430	0.00983354	0.00117959	0.0439084	0.0345629
2014-07-09 06:00:28	15.4788	37.189	7.31367	101.398	6.73583	2.04399	12.1598	1	2191.97	350.18	16.19	-71.3906	652.749	-12.0279	1.19845e+06	1.37435e+06	327059	0.00756239	0.000907154	0.0307242	0.0238756
2014-07-09 07:00:28	15.422	37.2237	7.28667	101.068	6.71783	1.94275	16.6501	2.61111	963.228	228.303	6.28459	-61.0804	531.715	-10.8118	1.04737e+06	1.31189e+06	389521	0.00377457	0.00175649	0.014386	0.00959661
2014-07-09 08:00:28	15.188	37.3995	7.2245	99.455	6.6385	1.68547	13.4871	2.61111	1293.88	258.182	8.01033	-55.3412	600.993	-10.9924	692944	1.10178e+06	599632	0.00537968	0.00250343	0.0205907	0.0136325
2014-07-09 09:00:28	15.116	37.6548	6.97567	97.8867	6.53217	1.37345	14.1835	2.61111	3192.98	425.519	29.1292	-71.8662	909.335	-13.4844	344175	771809	929602	0.0254457	0.0118411	0.102679	0.0691399
2014-07-09 10:00:28	15.4123	37.9923	6.733	96.8733	6.41333	1.10708	14.6478	3.61111	4166.39	490.947	30.6468	-71.7434	1131.15	-14.4404	142240	468529	1.23288e+06	0.0384369	0.0241077	0.134594	0.0916591
2014-07-09 11:00:28	15.9052	38.38	6.6695	96.4117	6.30283	0.889893	8.62753	3.61111	4977.83	533.76	37.4318	-74.4558	1513.12	-15.4249	62470.8	282648	1.41876e+06	0.0483128	0.0303018	0.154624	0.103875
2014-07-09 12:00:28	16.5612	38.6163	6.5455	98.5533	6.35083	0.747127	7.19797	3.61111	5659.45	573.829	44.0924	-72.2696	1712.16	-15.8217	34613.4	182124	1.51929e+06	0.0584769	0.0366767	0.182132	0.123738
2014-07-09 13:00:28	17.3195	38.8728	6.7035	101.997	6.46883	0.672045	9.8558	3.61111	6256.19	603.425	43.2261	-71.8262	1928.3	-16.3933	24044.5	124923	1.57649e+06	0.0583386	0.03659	0.188477	0.132077
2014-07-09 14:00:28	17.9403	38.9448	6.73067	104.375	6.54233	0.624821	13.7178	3.61111	5749.33	577.455	14.161	-67.9675	1049.39	-14.5538	20198.3	93766.8	1.60764e+06	0.0172582	0.0108244	0.0556308	0.0395467
2014-07-09 15:00:28	18.5032	39.0675	6.67617	108.237	6.706	0.708673	13.8714	3.61111	4087.43	483.953	10.5806	-67.4792	1049.62	-14.6062	32390.8	157277	1.54413e+06	0.0123044	0.00771736	0.039707	0.0286486
2014-07-09 16:00:28	18.8773	38.6317	6.693	114.588	7.06817	1.25272	27.9425	6.19444	2361.18	366.108	8.13836	-65.6796	902.297	-13.9376	320854	712125	989286	0.0217974	0.0162877	0.0390727	0.0351871
2014-07-09 17:00:28	18.8237	37.5803	6.89933	116.607	7.24333	1.89695	37.3885	6.19444	1227.84	260.909	6.45696	-65.159	604.039	-11.4717	1.08841e+06	1.31647e+06	384936	0.0155729	0.0116366	0.0280801	0.0252775
2014-07-09 18:00:28	18.744	36.3803	7.17017	114.757	7.1955	2.2971	49.9099	6.19444	856.714	220.897	3.83028	-64.207	447.334	-9.03029	1.71473e+06	1.49093e+06	210482	0.00589538	0.00440521	0.0106562	0.0095751
2014-07-09 19:00:28	19.3667	35.8442	7.31717	113.678	7.06283	2.50831	41.6534	6.19444	612.154	186.78	2.79289	-56.9355	373.265	-7.44549	2.07569e+06	1.5336e+06	167808	0.00222412	0.00166193	0.00373915	0.00340665
2014-07-09 20:00:28	19.2972	35.8432	7.31783	112.778	7.0145	2.45629	27.7442	6.19444	407.571	148.193	2.68941	-53.9793	367.11	-7.23139	1.9847e+06	1.52412e+06	177293	0.00182646	0.00136478	0.00290368	0.00264473
2014-07-09 21:00:28	18.7582	36.1283	7.23133	109.478	6.86917	2.18531	62.9576	6.19444	856.081	214.118	4.25511	-63.3711	390.773	-7.57855	1.53188e+06	1.45967e+06	241743	0.00743751	0.00555754	0.0142041	0.0127696
2014-07-09 22:00:28	18.0903	36.8778	7.08083	106.412	6.73117	1.82515	55.3459	6.19444	1790.8	318.765	6.83474	-68.6617	482.956	-9.18282	980980	1.27342e+06	427992	0.0165347	0.0123553	0.032597	0.0290225
2014-07-09 23:00:28	17.8418	37.4793	6.97583	105.732	6.695	1.43211	34.9912	6.19444	2014.68	339.822	8.31395	-68.9953	568.709	-10.6844	477316	913724	787687	0.0216976	0.0162131	0.0413609	0.0366451
2014-07-10 00:00:28	17.6542	38.0532	6.86967	102.88	6.51683	1.10453	16.3388	6.19444	2277.1	361.21	10.6923	-70.1635	701.307	-12.1028	184474	544256	1.15716e+06	0.0300244	0.0224351	0.0540609	0.0476706
2014-07-10 01:00:28	17.4898	38.4822	6.78067	99.62	6.31333	0.893948	12.2354	6.19444	3524.01	449.453	12.4853	-70.0365	813.737	-13.0172	74700.8	316743	1.38467e+06	0.0362234	0.0270672	0.0651355	0.0572348
2014-07-10 02:00:28	17.2683	38.9157	6.68817	95.3833	6.05367	0.769026	7.42353	6.19444	4549.67	513.778	14.0631	-69.9349	918.71	-13.7114	38720.3	200255	1.50116e+06	0.0415331	0.0310348	0.0721075	0.0630004
2014-07-10 03:00:28	16.9682	39.0835	6.65133	92.9517	5.92967	0.721566	6.71537	6.19444	4795.26	528.508	16.063	-69.8266	1013.48	-14.293	30230.8	161482	1.53993e+06	0.0481476	0.0359773	0.084599	0.0734649
2014-07-10 04:00:28	16.8268	39.081	6.641	91.2567	5.838	0.950074	10.7526	6.19444	5149.29	547.148	17.729	-69.8967	1057.39	-14.5447	104957	378601	1.32281e+06	0.0537485	0.0401626	0.0975038	0.0845189
2014-07-10 05:00:28	16.6875	38.3373	6.74133	95.0133	6.12283	1.39865	29.4311	6.19444	4327.49	499.646	17.6938	-70.7856	900.575	-13.6109	445361	875866	825545	0.0534245	0.0399205	0.106472	0.092388
2014-07-10 06:00:28	16.7333	37.6233	6.889	97.94	6.33233	1.80552	23.0517	6.19444	3272.7	435.54	15.9311	-70.6463	687.164	-11.9597	951754	1.26117e+06	440245	0.0473783	0.0354025	0.0874618	0.0758241
2014-07-10 07:00:28	16.7698	37.1625	6.98067	100.328	6.49983	2.05707	17.2108	1.5	2735.9	396.849	12.4433	-69.211	575.165	-10.7397	1.3269e+06	1.41464e+06	286767	0.00682853	0.00154714	0.0277266	0.0204895
2014-07-10 08:00:28	16.7198	37.1503	6.956	100.607	6.52367	1.9816	21.505	1.5	2044.26	343.379	9.52233	-67.6928	549.888	-10.3703	1.21098e+06	1.37611e+06	325299	0.00485774	0.00110062	0.0209761	0.0156827
2014-07-10 09:00:28	16.6528	37.4452	6.86933	99.0467	6.42067	1.66709	22.5379	1.5	2326.51	365.444	8.73819	-66.6232	563.999	-10.3465	761907	1.14706e+06	554351	0.00432342	0.000979558	0.0199888	0.0151169
2014-07-10 10:00:28	16.6358	37.7668	6.81033	97.82	6.32817	1.09932	13.6871	3.11111	2871.83	407.556	9.62453	-67.3469	600.566	-10.7378	345396	771355	930056	0.00864026	0.00479164	0.0312101	0.0215166
2014-07-10 11:00:28	16.858	38.1752	6.7345	97.35	6.2555	0.663548	9.37327	3.11111	3067.41	419.476	11.8289	-68.8795	733.553	-12.0644	134796	453663	1.24775e+06	0.0113115	0.00627301	0.0405339	0.0280325
2014-07-10 12:00:28	17.234	38.6272	6.64433	97.105	6.17633	0.484708	10.3425	3.11111	2591.23	385.343	9.13134	-69.7815	843.604	-13.126	58064.2	268633	1.43278e+06	0.00821934	0.00455821	0.0318148	0.022668
2014-07-10 13:00:28	17.8473	38.9538	6.59783	99.6383	6.25433	0.376672	9.90677	3.11111	3370.29	439.976					32717.3	173546	1.52786e+06
2014-07-10 14:00:28	18.6255	39.2592	6.5825	103.008	6.35767	0.314657	7.91937	3.11111	3741.81	463.845					24252.7	126646	1.57477e+06
2014-07-10 15:00:28	18.962	39.056	6.5825	104.532	6.4215	0.279537	5.58823	3.11111	3564.25	453.591	10.7497	-68.9779	1000.51	-14.3322	21144.2	102952	1.59846e+06	0.0106759	0.00592055	0.0373415	0.026967
2014-07-10 16:00:28	19.0403	39.1835	6.54617	106.03	6.49883	0.374514	15.7184	2.11111	4097.33	486.879	12.2112	-70.8309	1055	-14.5673	38507.1	179419	1.52199e+06	0.00882783	0.00319893	0.0468656	0.0364555
2014-07-10 17:00:28	19.467	38.6847	6.51667	113.968	6.949	1.04299	25.6056	2.11111	3522.12	450.538	13.0883	-70.7146	913.436	-13.8036	472324	871719	829692	0.00970963	0.00351847	0.0406178	0.030557
2014-07-10 18:00:28	19.3617	37.282	6.826	114.917	7.07767	1.73284	45.044	2.11111	2024.38	328.833	9.50577	-70.3452	594.5	-11.0845	1.3875e+06	1.41844e+06	282969	0.00650923	0.00235875	0.0288138	0.0219068
2014-07-10 19:00:28	19.4507	35.9898	7.08917	113.715	7.0515	2.14057	59.2175	2.11111	661.909	180.869	2.9115	-59.0295	396.865	-8.28647	2.06455e+06	1.53296e+06	168451	0.000643869	0.000233318	0.00291196	0.00222552
2014-07-10 20:00:28	19.49	35.8087	7.13733	113.392	7.0315	2.31337	37.066	2.11111	284.428	121.822	2.50431	-52.547	363.516	-7.32193	2.38352e+06	1.57303e+06	128381	0.000281238	0.000101912	0.0010978	0.000817501
2014-07-10 21:00:28	19.3012	35.8175	7.12283	112.135	6.97717	2.17209	38.3329	2.11111	649.026	189.045	2.84532	-53.9036	372.945	-7.64179	2.12055e+06	1.53924e+06	162175	0.000574426	0.000208155	0.00247797	0.00187179
2014-07-10 22:00:28	18.5797	36.1225	7.03633	108.317	6.81667	1.85212	73.4511	2.11111	1223.7	283.78	4.77257	-65.3224	389.922	-7.72777	1.57584e+06	1.46686e+06	234555	0.00221977	0.000804376	0.0117048	0.00904927
2014-07-10 23:00:28	17.8357	36.9437	6.88617	104.553	6.64467	1.46173	61.2962	2.11111	1684.17	337.065	6.99445	-67.8384	474.2	-9.03188	976223	1.27066e+06	430755	0.00406159	0.0014718	0.0224722	0.017317
2014-07-11 00:00:28	17.4865	37.5993	6.77817	103.19	6.57717	1.07166	30.7926	2.11111	2436.22	414.176	8.77723	-68.5171	573.759	-10.515	476830	913271	788140	0.00553114	0.00200432	0.0269966	0.0202267
2014-07-11 01:00:28	17.1308	38.2228	6.66833	100.167	6.40283	0.751665	14.1334	2.11111	3647.64	510.049	11.8502	-69.6245	714.544	-12.0169	188782	552245	1.14917e+06	0.00805001	0.00291708	0.0363624	0.0266095
2014-07-11 02:00:28	16.7508	38.7115	6.58317	96.2567	6.18133	0.56164	12.2231	2.11111	4921.51	607.735	15.4963	-70.0624	852.747	-13.1637	84785.8	344375	1.35704e+06	0.01099	0.00398246	0.0530249	0.0390598
2014-07-11 03:00:28	16.2208	39.1402	6.50133	92.1633	5.96317	0.458865	27.0459	2.11111	5634.61	658.079	17.4081	-69.5365	959.976	-13.8588	50184.6	244027	1.45738e+06	0.0123934	0.004491	0.0829283	0.0642883
2014-07-11 04:00:28	15.7192	39.146	6.49933	88.7617	5.79883	0.404603	24.5794	2.11111	6355.48	706.364	15.0972	-68.8611	1005.01	-14.3018	37517.8	196135	1.50528e+06	0.010351	0.00375088	0.0705015	0.0544313
2014-07-11 05:00:28	15.3472	39.3553	6.46633	89.6867	5.896	0.561674	17.3388	2.11111	6510.2	721.957	15.0374	-68.9315	1056.23	-14.6457	92571.9	349278	1.35213e+06	0.0101891	0.00369222	0.0583777	0.0434137
2014-07-11 06:00:28	15.3028	38.567	6.50983	93.05	6.14983	1.05643	20.0062	2.11111	5349.78	654.937	13.7272	-68.7877	941.504	-14.0506	467986	893266	808145	0.00912692	0.00330732	0.0446957	0.0320858
2014-07-11 07:00:28	15.5238	37.5242	6.68283	97.0983	6.43167	1.55137	25.2139	2.11111	4304.02	591.396	13.2186	-69.1916	685.201	-12.0665	1.1073e+06	1.33059e+06	370818	0.00877426	0.00317952	0.0417093	0.0298977
2014-07-11 08:00:28	15.767	37.0238	6.767	100.383	6.63733	1.81966	19.951	2.11111	3205.27	477.364	11.9918	-69.6273	553.736	-10.3794	1.52127e+06	1.46124e+06	240170	0.00783033	0.00283747	0.0337006	0.0236534
2014-07-11 09:00:28	15.8939	36.9481	6.77484	100.948	6.66	1.69197	27.5875	2.11111	1963.89	335.796	7.72386	-68.0305	505.981	-9.53917	1.32026e+06	1.40886e+06	292550	0.00438359	0.00158848	0.0204053	0.0146545
2014-07-11 10:00:28						1.32666	24.2784	2.61111	1959.16	323.584	8.4526	-69.6592	538.634	-10.0944	788716	1.16323e+06	538181	0.00591241	0.00275133	0.0263351	0.0185792
2014-07-11 11:00:28						0.963912	16.8596	2.61111	1774.19	288.933					364171	794853	906558
2014-07-11 12:00:28	15.8236	38.1084	6.32556	100.831	6.61267	0.694718	10.0263	2.61111	773.496	159.45					151972	487925	1.21349e+06
2014-07-11 13:00:28	16.2843	38.6882	6.21567	100.893	6.5365	0.524957	6.94327	2.61111	877.456	152.96					70954.6	307413	1.394e+06
2014-07-11 14:00:28	16.9602	39.0233	6.1835	104.047	6.63833	0.427524	8.3169	2.61111	1895.49	260.7					42559	216035	1.48538e+06
2014-07-11 15:00:28	17.3633	38.9268	6.18667	104.94	6.65033	0.36816	7.33757	2.61111	2455.36	332.048					31123.6	166481	1.53493e+06
2014-07-11 16:00:28	17.2358	39.0137	6.10233	101.967	6.47467	0.34067	10.1312	3.11111	3082.25	387.308					27161.7	145320	1.55609e+06
2014-07-11 17:00:28	17.1727	39.2245	5.9465	103.33	6.55733	0.525655	10.7171	3.11111	3843.69	450.022					90467.2	321115	1.3803e+06
2014-07-11 18:00:28	17.9228	38.4477	6.18583	112.575	7.07783	1.34588	41.9382	3.11111	3036.88	411.206					833012	1.15648e+06	544932
2014-07-11 19:00:28	18.4497	36.8288	6.50733	113.183	7.11583	2.00359	62.2203	3.11111	1211.84	267.229					1.82957e+06	1.50362e+06	197795
2014-07-11 20:00:28	19.1968	35.8707	6.68967	112.852	7.034	2.39486	69.3314	3.11111	640.155	206.322					2.55366e+06	1.61053e+06	90882.4
2014-07-11 21:00:28	19.2537	35.7557	6.71483	112.552	7.01383	2.51793	31.1096	3.11111	794.807	224.806					2.8202e+06	1.67888e+06	22532.9
2014-07-11 22:00:28	19.0835	35.7717	6.7115	111.77	6.98583	2.32591	45.9734	3.11111	1171.14	277.632					2.41249e+06	1.58153e+06	119879
2014-07-11 23:00:28	18.4753	35.8977	6.66567	108.125	6.83017	1.98745	83.8843		1039.16	270.946					1.80025e+06	1.50146e+06	199953
2014-07-12 00:00:28	17.1547	36.533	6.544	103.927	6.70883	1.62929	76.4555	3.11111	1377.72	314.527					1.22336e+06	1.37934e+06	322067
2014-07-12 01:00:28	16.1048	37.4092	6.413	101.77	6.66833	1.33208	36.5507	3.11111	2032.91	384.397					794676	1.16964e+06	531769
2014-07-12 02:00:28	15.8417	37.9623	6.32183	100.215	6.57633	0.984956	21.675	3.11111	2797.13	458.897					384680	818503	882908
2014-07-12 03:00:28	15.5	38.27	6.3	98.3	6.48	0.751284	43.9097	3.11111	1368.37	297.36					186354	551357	1.15005e+06
2014-07-12 04:00:28						0.626414	56.79	3.11111	423.151	177.921					112914	412098	1.28931e+06
2014-07-12 05:00:28						0.562978	16.5801	3.11111	1110.78	240.871					84325.4	345093	1.35632e+06
2014-07-12 06:00:28	14.1882	39.3038	6.14444	90.1822	6.06311	0.741527	17.8581	3.11111	4970.63	592.564					189957	542308	1.1591e+06
2014-07-12 07:00:28	14.1652	38.5052	6.2185	94.0983	6.365	1.32057	11.5195	3.61111	5323.91	640.385					788965	1.14771e+06	553704
2014-07-12 08:00:28	14.5728	37.3038	6.37917	98.4783	6.65633	1.84679	24.4974	3.61111	2644.6	438.622					1.56756e+06	1.46439e+06	237017
2014-07-12 09:00:28	15.716	36.5825	6.519	102.767	6.81783	2.07362	21.8731	3.61111	1666.32	349.332					1.94426e+06	1.52005e+06	181363
2014-07-12 10:00:28	15.6952	36.66	6.48517	103.17	6.84783	1.86618	26.2868	3.61111	2268.54	403.453					1.59849e+06	1.47141e+06	229999
2014-07-12 11:00:28	15.0942	37.2002	6.37417	101.365	6.7865	1.4641	20.4219	3.61111	2971.19	467.763					980480	1.27078e+06	430635
2014-07-12 12:00:28	15.1658	37.6307	6.3045	101.335	6.7565	1.02135	15.961	3.61111	3598.08	514.35					493257	933868	767543
2014-07-12 13:00:28	15.4852	38.2038	6.187	101.872	6.72317	0.708944	9.12053	3.61111	4352.93	567.698					243707	640565	1.06085e+06
2014-07-12 14:00:28	15.9698	38.709	6.09683	102.327	6.66983	0.547926	8.7583	3.61111	6688.97	702.049					134832	457533	1.24388e+06
2014-07-12 15:00:28	16.3932	39.2263	6.08383	104.913	6.75767	0.457216	8.9692	3.61111	8269.83	787.23					90334.9	359904	1.34151e+06
2014-07-12 16:00:28	16.5538	39.256	6.0775	106.718	6.852	0.410757	6.80777	2.11111	8286.01	788.976	36.4326	-71.9226	1245.11	-15.8453	72114.1	312494	1.38892e+06	0.0281869	0.0102141	0.127919	0.092442
2014-07-12 17:00:28	16.41	39.1032	6.06817	106.06	6.83483	0.387552	24.684	2.11111	8863.74	815.596	36.6433	-72.0579	1229.74	-15.4467	64175.3	289650	1.41176e+06	0.0282908	0.0102517	0.186927	0.145008
2014-07-12 18:00:28	16.459	39.1703	6.0365	106.415	6.85067	0.666609	32.4086	2.11111	9611.93	849.165	34.6292	-71.9854	1228.95	-15.3466	242951	594481	1.10693e+06	0.0266635	0.00966204	0.169823	0.131057
2014-07-12 19:00:28	17.2318	37.91	6.30983	111.22	7.11167	1.54734	49.9228	2.11111	6348.28	674.469	18.2882	-74.4456	1065.68	-14.936	1.29375e+06	1.37039e+06	331024	0.0134627	0.00487847	0.0718856	0.0544519
2014-07-12 20:00:28	18.6083	36.258	6.62033	111.413	7.007	2.25502	56.8686	2.11111	2333.04	405.197	5.40439	-81.3572	608.879	-11.9818	2.32954e+06	1.57288e+06	128534	0.00275376	0.000997879	0.0132644	0.0100551
2014-07-12 21:00:28	19.4073	35.7793	6.70617	112.173	6.96767	2.81729	35.3747	2.11111	1227.69	300.99	3.60255	-67.0459	359.832	-7.98459	3.12588e+06	1.80521e+06	-103794	0.00125338	0.000454186	0.00461321	0.00338603
2014-07-12 22:00:28	19.4525	35.7187	6.7125	112.327	6.9725	2.8755	22.2224	2.11111	751.464	233.125	3.15249	-61.8004	324.195	-6.63894	3.28417e+06	1.87905e+06	-177640	0.00085561	0.000310047	0.00278666	0.00199033
2014-07-12 23:00:28	19.2297	35.7357	6.69533	110.962	6.916	2.64223	30.2325	2.11111	676.03	222.154	3.5809	-63.3625	322.137	-6.38653	2.70082e+06	1.64969e+06	51717.4	0.00122197	0.000442805	0.004427	0.00322631
2014-07-13 00:00:28	18.532	35.8655	6.64667	107.33	6.77467	2.25966	42.3356	2.11111	1102.44	282.023	4.72584	-67.6358	334.561	-6.62835	1.96076e+06	1.52063e+06	180785	0.00217213	0.000787113	0.00885433	0.00652399
2014-07-13 01:00:28	17.251	36.3742	6.55	103.117	6.65133	1.81697	25.2231	2.11111	2169.15	397.211	6.42305	-70.9512	365.896	-7.20619	1.23631e+06	1.37955e+06	321861	0.003494	0.00126612	0.0144731	0.0104198
2014-07-13 02:00:28	16.1647	37.116	6.437	100.797	6.61067	1.45552	14.2444	2.11111	3413.07	503.773	8.62828	-72.1318	445.906	-8.782	719549	1.11959e+06	581825	0.0051767	0.00187588	0.0205973	0.0142946
2014-07-13 03:00:28	15.5412	37.7538	6.31717	99.835	6.60467	1.12231	24.0103	2.11111	3749.65	528.881	11.1508	-72.3542	544.642	-10.3976	343716	770359	931052	0.00710721	0.00257544	0.0362135	0.0263809
2014-07-13 04:00:28	14.982	38.308	6.2305	97.0333	6.46617	0.88786	38.3395	2.11111	4465.22	576.859	14.2566	-71.7384	706.299	-12.0783	158764	502278	1.19913e+06	0.00945744	0.00342709	0.0600826	0.0453419
2014-07-13 05:00:28	14.6595	38.6648	6.14533	93.5333	6.26033	0.762732	34.2439	2.11111	5701.54	650.032	19.8194	-71.6517	876.363	-13.1451	92854.9	365755	1.33566e+06	0.0137359	0.00497746	0.0890232	0.0670244
2014-07-13 06:00:28	14.2107	39.0248	6.08183	91.205	6.14283	0.705255	50.5252	2.11111	6156.01	673.408	29.9599	-71.6084	1055.75	-13.7078	70184.3	307041	1.39437e+06	0.0215098	0.0077945	0.159486	0.122327
2014-07-13 07:00:28	13.828	39.0565	6.101	90.7367	6.16	0.914202	27.0458	6.19444	5472.4	632.073	26.5222	-71.1062	935.756	-13.7638	188472	534884	1.16653e+06	0.0775164	0.0579226	0.182329	0.150457
2014-07-13 08:00:28	14.0067	38.0397	6.22583	96.1833	6.5465	1.52	13.976	6.19444	4960.78	601.965	16.9402	-70.7247	1117.86	-14.4598	814914	1.16398e+06	537428	0.0470011	0.0351207	0.0954922	0.0782203
2014-07-13 09:00:28	14.6697	37.0153	6.39017	101	6.82517	2.04078	14.0555	6.19444	2533.95	429.181	17.5756	-71.7405	815.989	-12.9474	1.59002e+06	1.46911e+06	232305	0.0500594	0.0374059	0.095234	0.0790155
2014-07-13 10:00:28	15.906	36.4377	6.52317	104.573	6.918	2.20707	11.1734	6.19444	1378.56	317.756	15.2647	-71.4692	586.17	-10.8646	1.86436e+06	1.51151e+06	189896	0.043966	0.0328527	0.0756606	0.0642447
2014-07-13 11:00:28	15.6623	36.619	6.47367	104.74	6.955	1.95729	23.4037	6.19444	1704.68	350.733	13.5916	-73.0539	508.381	-9.93818	1.45569e+06	1.44123e+06	260180	0.0380291	0.0284165	0.0733706	0.0623621
2014-07-13 12:00:28	15.0938	37.1772	6.35917	104.082	6.96983	1.52836	20.9102	6.19444	2695.74	447.816	19.9993	-73.3481	615.633	-11.3144	818944	1.18038e+06	521035	0.0587587	0.0439063	0.118937	0.100099
2014-07-13 13:00:28	15.2607	37.5775	6.29333	104.297	6.94033	1.154	18.5298	6.19444	3238.84	491.312	29.6071	-72.0867	719.283	-12.0585	373738	806266	895145	0.0911541	0.0681132	0.187428	0.158383
2014-07-13 14:00:28	15.49	37.975	6.23	104.95	6.935	0.978355	7.8715	6.19444			30.3445	-72.152	822.782	-12.7021	231403	625991	1.07542e+06	0.094163	0.0703615	0.175224	0.147841

## Sheet: Jacobs Well Mangrove
Date/Time	Temperature (°C)	Salinity	pH (NBS)	DO(%)	DO mg/L	Depth (m)	Current velocity (cm/s)	Windspeed (m/s)	Rn (dpm/m3)	Rn unc (dpm/m3)	CH4 (nM)	d13C-CH4	pCO2 (uatm)	d13C-CO2	Water Volume (m3)	Water area (m2)	Exposed area (m2)	Flux CH4 (RC01) (mmol/m2/d)	Flux CH4 (W92) (mmol/m2/d)	Flux CH4 (BO04) (mmol/m2/d)	Flux (HO14) (mmol/m2/d)
2013-11-03 15:03:00	28.9378	37.5373	7.42661	93.271	5.83527	0.873575	20.2841		1916.28	473.098	18.5299	-75.5946	1403.79	-11.9394	110146	310674	89326
2013-11-03 16:03:00	29.2739	38.3941	7.17707	78.2805	4.84886	0.553086	18.2323		2702.21	561.361	30.1144	-73.7057	2565.07	-13.4146	20714.6	108582	291418	0.0213506	0.00246629	0.0789816	0.0709623
2013-11-03 17:03:00	29.0512	39.1848	6.98492	64.0919	3.96692	0.337378	11.7139		5312.23	785.728	56.5356	-73.239	4414.09	-14.4789	5942.34	19289.7	380710	0.040992	0.00473514	0.150374	0.134837
2013-11-03 18:03:00	28.6828	39.3969	6.93422	58.2114	3.61973	0.324823	5.5042		8423.18	1001.86	79.3624	-72.5362	5179.91	-14.6501	6300.31	17709.1	382291	0.057519	0.00664424	0.16906	0.151129
2013-11-03 19:03:00	27.0745	37.5319	7.37798	77.6831	5.02247	0.542332	3.60129	1.74911	7581.31	954.305	73.5459	-72.3048	2165.37	-11.9366	18345.8	99547.2	300453	0.0576458	0.0116542	0.13375	0.113867
2013-11-03 20:03:00	25.9882	36.6884	7.59871	85.6632	5.65051	0.810105	11.0027	1.6035	4272.38	733.83	45.7556	-71.8632	937.056	-10.4542	86062.3	284700	115300	0.0395639	0.0117946	0.110647	0.0915288
2013-11-03 21:03:00	25.4311	36.3614	7.68136	88.6325	5.91702	1.16156	14.3066	2.19816	4012.83	717.163	32.5847	-70.3894	736.694	-9.61353	234327	364489	35511	0.0339334	0.0143702	0.087076	0.0692407
2013-11-03 22:03:00	25.4097	36.1873	7.74322	95.5629	6.38347	1.47388	23.39		2394.43	555.075	22.2229	-71.9652	618.493	-9.20046	376182	369889	30111.1
2013-11-03 23:03:00	25.3738	36.2013	7.73251	94.5902	6.31976	1.54797	8.24936	2.29495	1401.19	423.665	16.9077	-74.4934	618.33	-9.25502	408304	370029	29971.4	0.0177934	0.00822277	0.0364267	0.0286553
2013-11-04 00:03:00	24.8896	36.3155	7.70373	88.3995	5.95339	1.47916	15.4433	1.95489	1966.49	505.797	17.3287	-74.2882	670.723	-9.67996	378672	369927	30073.1	0.0156398	0.00609842	0.040466	0.0324172
2013-11-04 01:03:00	24.4003	36.6721	7.59764	77.919	5.27654	1.32485	16.3224	1.06551	2523.48	582.607	23.1814	-73.0158	856.482	-10.5777	309683	369173	30827.2	0.0149335	0.00260674	0.0473987	0.0408617
2013-11-04 02:03:00	24.0654	37.1088	7.45827	66.628	4.52751	1.06497	12.0921	0.591175	3854.64	722.842	34.7916	-72.2946	1216.01	-11.7013	190023	358683	41316.9	0.0192337	0.00126861	0.0633686	0.0583215
2013-11-04 03:03:00	23.7286	37.5675	7.29614	55.5912	3.79183	0.747701	11.6783	0.423763	5210.98	843.805	48.191	-71.8967	1799.9	-12.6776	65890.8	246541	153459	0.0251779	0.000842641	0.0970176	0.0914331
2013-11-04 04:03:00	23.3851	38.172	7.07964	43.6176	2.98117	0.453877	11.4448	1.41429	7042.68	985.761	65.2619	-71.486	3034.43	-13.9717	9860.18	55228.5	344771	0.0526066	0.0155665	0.1969	0.165014
2013-11-04 05:03:00	23.1292	38.703	6.90358	36.2505	2.48051	0.27512	3.91766	1.78224	9186.67	1129.87	84.9027	-71.5087	4723.37	-15.2127	7449.69	10803.5	389197	0.0763481	0.0271691	0.236272	0.188573
2013-11-04 06:03:00	22.8472	38.6818	6.88732	38.2181	2.63056	0.284516	6.1381	2.48939	12388	1321.97	94.9931	-71.1093	5189.81	-15.4775	7369.42	12565.9	387434	0.117114	0.058019	0.335044	0.269989
2013-11-04 07:03:00	22.7501	36.805	7.51668	77.9029	5.43117	0.532612	10.589	2.51816	10585.5	1218.89	71.1304	-70.6824	1648.53	-12.5271	17534.8	95090.7	304909	0.0839805	0.0423219	0.249869	0.196642
2013-11-04 08:03:00	22.729	36.2865	7.70029	88.5747	6.19302	0.823565	8.79807	2.78236	3769.85	722.57	35.9383	-70.8053	687.083	-10.2526	90888.9	291441	108559	0.0495017	0.0262705	0.109534	0.0897518
2013-11-04 09:03:00	23.1856	36.2543	7.73802	91.7225	6.36066	1.16459	15.4521	3.11544	2280.32	563.632	18.8655	-69.7167	624.764	-9.83796	235698	364881	35119.4	0.0259122	0.0151132	0.0602069	0.0481927
2013-11-04 10:03:00	23.8943	36.1306	7.75622	92.8386	6.36778	1.48783	27.759	2.99337	1180.68	400.041	12.0687	-68.6399	591.137	-9.36154	382032	369892	30108.2	0.017043	0.0096481	0.0376053	0.0321293
2013-11-04 11:03:00	23.3787	35.9016	7.7978	95.2008	6.59539	1.73129	32.4584	2.46933	989.498	361.857	8.71051	-66.2613	543.781	-8.93539	485346	370113	29886.7	0.00875885	0.00451449	0.0234447	0.0192483
2013-11-04 12:03:00	22.613	35.6801	7.80678	97.5812	6.86008	1.84804	13.8283	2.61931	449.417	221.466	6.03471	-64.5673	491.395	-8.4643	535092	370129	29870.7	0.00523563	0.00271506	0.011775	0.009241
2013-11-04 13:03:00	23.5044	36.0746	7.74953	96.5044	6.662	1.7533	26.6976	2.17898	622.27	288.611	5.45064	-62.918	612.355	-11.3671	494587	370118	29881.6	0.00418325	0.00206038	0.0115054	0.00930166
2013-11-04 14:03:00	24.3125	36.6263	7.68251	98.6549	6.69849	1.5293	56.2258	2.56873	1388.03	428.138	13.7567	-70.3315	707.944	-10.217	399900	369964	30035.5	0.0156678	0.0079924	0.0491748	0.0409723
2013-11-04 15:03:00	25.2323	37.0204	7.60834	100.489	6.70024	1.12344	33.0881	1.71685	1755.94	475.849	17.2745	-71.5647	835.497	-10.4327	217674	357879	42121.4	0.0150785	0.00553944	0.0505429	0.0427471
2013-11-04 15:30:00	25.4969	37.3189	7.52831	97.5025	6.46246	0.926127	23.5649	1.66279	1933.39	496.401	20.5741	-72.2729	984.829	-11.1773	130276	331982	68018.3	0.0176238	0.00591777	0.0582259	0.0488919
2013-11-04 16:30:00	25.3948	38.0625	7.28288	83.361	5.51042	0.619661	20.1431	1.76568	3079.64	627.594	30.5019	-73.0587	1693.23	-12.9276	32487.3	154680	245320	0.0271423	0.00929247	0.099731	0.0828789
2013-11-04 17:30:00	24.7866	38.7854	7.09229	71.372	4.74568	0.394922	8.12	1.77265	4976.45	799.516	45.39	-72.9895	2719.52	-14.1941	6187.75	31853.8	368146	0.0421841	0.0156698	0.126744	0.104274
2013-11-04 18:30:00	24.1612	39.1162	6.98119	63.4195	4.2528	0.352375	4.42881	1.74475	8168.99	1042.83	70.7741	-72.6167	3775.15	-14.8486	5661.75	21592.8	378407	0.0653713	0.0235722	0.184201	0.149447
2013-11-04 19:30:00	23.6857	38.3709	7.15483	70.2737	4.78102	0.534405	5.79339	1.77614	9904.17	1155.2	80.3521	-72.1878	3184.23	-14.054	17040.1	93950.3	306050	0.0738861	0.027148	0.203569	0.163345
2013-11-04 20:30:00	22.5021	36.9819	7.53619	85.9246	6.00703	0.768095	6.78678	2.00197	6171.09	928.725	64.3109	-71.0997	1133.27	-11.3392	71094	263245	136755	0.0630101	0.0261193	0.169233	0.132767
2013-11-04 21:30:00	22.1445	36.5318	7.62153	88.0847	6.21297	1.03382	8.43542	1.675	3722.03	717.983	43.7173	-69.3363	768.808	-10.1905	176004	355389	44610.6	0.0352596	0.0111823	0.102721	0.0802556
2013-11-04 22:30:00	22.6201	36.3049	7.71432	90.5559	6.3428	1.308	12.0983	1.51805	2392.58	571.61	29.551	-67.9117	638.519	-9.22564	301909	368959	31041.2	0.0233867	0.00751114	0.0668384	0.0545501
2013-11-04 23:30:00	22.6624	36.0919	7.75127	92.1288	6.45576	1.50009	12.251	1.50671	1218.61	400.767	21.252	-68.1221	571.819	-8.93354	387723	369962	30038.4	0.0158608	0.00482001	0.0449979	0.036183
2013-11-05 00:30:00	22.3903	36.217	7.7139	88.8407	6.25127	1.47218	15.4222	1.29134	1422.98	440.538	16.7037	-66.1694	587.543	-9.09499	375576	369906	30094.2	0.0111202	0.00284988	0.0347612	0.0286997
2013-11-05 01:30:00	21.7825	36.7354	7.57339	80.7771	5.72432	1.28528	11.1188	1.6096	2572.91	604.016	19.3577	-69.1754	789.283	-10.592	291515	368718	31282.2	0.014557	0.00475647	0.0430531	0.0341341
2013-11-05 02:30:00	21.1421	37.2888	7.41492	71.6932	5.12627	1.00988	11.0481	1.53287	4114.55	770.136	30.4746	-71.6063	1168.14	-12.1414	165602	351262	48737.6	0.0224065	0.00650384	0.0748832	0.0593713
2013-11-05 03:30:00	20.6314	37.7436	7.25322	64.1881	4.61619	0.699415	7.85169	1.43608	5582.75	902.727	45.8509	-72.155	1676.12	-13.2674	51615	213791	186209	0.0324399	0.00823253	0.114959	0.0911654
2013-11-05 04:30:00	20.2481	38.2577	7.05136	54.9254	3.9678	0.432892	6.4561	1.37418	8276.98	1109.86	64.9018	-72.059	2620.74	-14.4652	8069.48	45355.3	354645	0.0453538	0.0110569	0.174937	0.13987
2013-11-05 05:30:00	20.0183	38.6145	6.91983	47.8593	3.46364	0.304232	6.75915	1.03063	12244	1355.24	89.0925	-71.776	3889.58	-15.4504	6385.85	13718.3	386282	0.0548311	0.00916242	0.258739	0.21797
2013-11-05 06:30:00	19.9342	38.4222	6.96381	49.1466	3.56712	0.346788	6.20458	0.95739	14829.6	1496.65	108.63	-71.3749	4067.42	-15.4269	6096.37	21652.1	378348	0.0652503	0.00968557	0.290765	0.245961
2013-11-05 07:30:00	21.1112	36.7792	7.53627	78.2788	5.61788	0.571308	5.88475	1.103	11715.2	1298.87	97.668	-70.8884	1398.12	-11.5096	22896.8	119054	280946	0.0639049	0.0120843	0.217371	0.179817
2013-11-05 08:30:00	21.525	36.3803	7.67034	86.0144	6.13788	0.849881	10.392	1.08033	5458.13	882.387	70.6489	-70.1474	712.335	-9.24485	100361	304465	95534.7	0.0466866	0.00962857	0.163758	0.138339
2013-11-05 09:30:00	21.9018	36.2673	7.69585	91.1314	6.46771	1.19134	14.6168	1.27478	3620.68	716.196	50.5062	-69.2412	660.007	-9.1287	248011	365989	34011.1	0.0359341	0.00913426	0.121274	0.100456
2013-11-05 10:30:00	21.4296	35.8093	7.77093	97.9424	7.02627	1.52976	29.6336	2.20426	1811.11	500.069	34.5965	-67.6696	528.478	-8.31039	400078	369964	30036.2	0.0345325	0.0154281	0.114042	0.0889939
2013-11-05 11:30:00	21.1272	35.5038	7.82169	104.245	7.53034	1.80756	35.159	1.76917	737.898	315.1	18.656	-65.7133	429.117	-7.91906	517959	370124	29875.9	0.0145337	0.00520446	0.0541927	0.043351
2013-11-05 12:30:00	21.3212	35.4632	7.83924	106.583	7.6728	1.96006	15.0142	2.15108	484.276	256.803	10.3276	-64.2236	421.8	-7.80221	585994	370134	29866.4	0.00867118	0.00387262	0.0225192	0.0177395
2013-11-05 13:30:00	22.371	35.6627	7.80339	107.447	7.58593	1.88851	19.7568	2.39086	478.832	255.943	8.24876	-65.9256	476.642	-8.26266	553188	370131	29868.9	0.00768498	0.00374842	0.0189123	0.0152408
2013-11-05 14:30:00	24.0784	36.3327	7.73	108.525	7.40873	1.71112	39.7715	2.5417	912.069	341.661	12.0953	-69.8085	620.224	-9.39661	476882	370107	29893.2	0.0138015	0.00725333	0.03753	0.0310789
2013-11-05 15:30:00	24.5998	36.456	7.68356	106.724	7.21636	1.3886	69.7656	2.68732	1448.23	435.843	14.4964	-70.9543	715.505	-9.50597	337995	369433	30567.3	0.0175806	0.00942023	0.0578277	0.0483721
2013-11-05 16:30:00	24.6542	36.9325	7.55525	97.8627	6.59407	0.997041	31.4258	2.43707	1662.36	459.988	17.7331	-71.5795	943.561	-9.98502	160735	345969	54031.4	0.0218261	0.0108444	0.0601876	0.051413
2013-11-05 17:30:00	23.9492	37.7153	7.29983	81.5712	5.53746	0.665978	19.4337	2.31674	3775.11	707.317	36.4164	-72.3288	1650.3	-12.6666	42396.5	189155	210845	0.041719	0.0200752	0.130377	0.106777
2013-11-05 18:30:00	23.1796	38.3736	7.11415	71.6119	4.90627	0.463514	7.67746	2.08132	5347.78	852.762	56.788	-72.4974	2530.91	-13.6944	9036.47	54443.1	345557	0.0618327	0.0267163	0.167015	0.138257
2013-11-05 19:30:00	22.4555	38.6653	7.01966	65.5449	4.53746	0.446653	4.01712	2.07434	8551.14	1091.82	73.7968	-72.2679	3172.76	-14.3804	7863.57	47410.6	352589	0.0738816	0.031172	0.196277	0.152086
2013-11-05 20:30:00	22.2136	38.2464	7.1122	68.2534	4.76297	0.614339	7.11288	1.7369	9751.98	1170.37	78.406	-71.5251	2722.67	-13.7934	29858.6	148697	251303	0.0695563	0.0254352	0.208749	0.167014
2013-11-05 21:30:00	21.1831	36.9766	7.44144	83.6907	5.98746	0.825444	6.09627	1.51805	6818.98	989.573	55.1118	-71.5524	1130.83	-11.6466	90358.9	297516	102484	0.0420355	0.0123427	0.125883	0.0989138
2013-11-05 22:30:00	21.1385	36.5497	7.55568	85.6873	6.15076	1.08027	8.02254	1.63576	4464.27	805.465	35.0339	-68.304	810.565	-10.5812	196861	360480	39520	0.0272143	0.00877259	0.0794084	0.0615176
2013-11-05 23:30:00	21.5947	36.2529	7.68508	90.3559	6.44864	1.35584	14.9776	2.02813	3128.75	653.513	24.0936	-69.3584	627.196	-9.64981	323630	369355	30644.5	0.0214035	0.00866591	0.064274	0.0496153
2013-11-06 00:30:00	21.556	36.0507	7.73771	94.328	6.74305	1.52705	11.2768	1.54421	1522.63	458.838	15.8149	-65.3605	536.257	-9.27099	399367	370005	29995.2	0.0108145	0.002977	0.0324355	0.0251695
2013-11-06 01:30:00	21.367	36.217	7.68771	89.2034	6.38924	1.45595	14.852	1.46747	1860.27	502.569	13.4433	-65.5474	597.966	-9.59329	368491	369870	30130.5	0.00874866	0.00236136	0.0288371	0.0228927
2013-11-06 02:30:00	20.8485	36.6466	7.55017	79.9492	5.76661	1.26509	11.1997	1.61396	3024.15	661.258	20.5207	-69.695	821.832	-10.7517	282194	368418	31581.7	0.0143281	0.00396499	0.0469711	0.03655
2013-11-06 03:30:00	20.2987	37.1609	7.36924	69.6627	5.0572	0.998917	11.2753	1.34366	5342.64	889.911	38.0267	-71.6133	1268.27	-12.1859	160700	349964	50035.7	0.0250052	0.00528761	0.0923846	0.0738125
2013-11-06 04:30:00	19.9331	37.638	7.19847	60.4856	4.40822	0.699681	10.5849	1.06464	8437.65	1122.65	60.6631	-72.2029	1899.3	-13.211	51690.1	214056	185944	0.0365756	0.0052923	0.156106	0.129277
2013-11-06 05:30:00	19.7306	38.1562	6.98983	48.9932	3.57364	0.438414	7.12203	1.27478	10804	1278.62	88.7962	-72.2771	3104.62	-14.3454	8296.22	47172.9	352827	0.059206	0.012284	0.239502	0.191674
2013-11-06 06:30:00	19.6319	38.4504	6.85814	41.6322	3.03568	0.318546	14.6529	0.904202	14846.9	1501.15	119.938	-71.8918	4344.17	-15.2543	5959.66	15478.8	384521	0.0695061	0.00828504	0.445892	0.383655
2013-11-06 07:30:00	20.06	37.6924	7.11898	55.6636	4.04085	0.437642	9.01864	1.4108	15478.3	1527.24	128.213	-71.3809	2906.26	-13.6265	8456.63	47499	352501	0.091184	0.022032	0.398232	0.320381
2013-11-06 08:30:00	21.2668	36.5316	7.58373	84.5576	6.05678	0.675795	8.73373	1.43696	7305.18	1017.59	83.9052	-70.4602	822.599	-9.58671	44788	196748	203252	0.0625907	0.0165657	0.224175	0.179147
2013-11-06 09:30:00	21.8283	36.4109	7.62415	88.9763	6.3178	0.974463	10.6066	1.42998	4493.15	754.723	50.8235	-68.992	729.685	-9.46175	150497	343895	56105	0.0387418	0.0105718	0.126859	0.09929
2013-11-06 10:30:00	22.2057	36.2247	7.69	95.3992	6.73508	1.33921	21.4751	1.39423	2868.05	445.828					315779	369023	30977.2
2013-11-06 11:30:00	21.5583	35.757	7.77754	101.888	7.2939	1.68009	41.7156	1.56688	1479.44	323.268					463846	370093	29907.5
2013-11-06 12:30:00	21.4472	35.5029	7.81492	105.468	7.6472	1.94092	29.2675	2.18334	754.474	232.45					577538	370133	29867.2
2013-11-06 13:30:00	21.9984	35.531	7.8139	106.686	7.58788	1.99733	9.95017	1.93658	393.95	165.836					604007	370134	29865.7
2013-11-06 14:30:00	23.5916	35.856	7.7639	109.622	7.56619	1.88913	19.9154	1.84851	416.811	166.833					553528	370131	29868.9
2013-11-06 15:30:00	24.7284	36.4191	7.6872	109.075	7.36237	1.69301	42.2756	1.97756	1115.4	267.222					469263	370101	29899.2
2013-11-06 16:30:00	24.9507	36.5707	7.64263	105.061	7.05746	1.36199	74.4012	2.26094	1483.24	313.164					326022	369228	30772.3
2013-11-06 17:30:00	25.244	37.0732	7.49186	93.9653	6.2628	0.976337	34.6644	1.83369	1440.79	306.099					151826	341964	58036.2
2013-11-06 18:30:00	24.5217	37.6154	7.25492	79.0051	5.31424	0.652732	20.99	1.83718	1916.95	356.653					39200.4	179118	220882
2013-11-06 19:30:00	23.6636	38.133	7.06203	69.1754	4.70754	0.450527	13.7922	1.31401	2896.66	439.649					8153.12	49090.9	350909
2013-11-06 20:30:00	23.0478	38.3703	6.96924	62.5966	4.30127	0.440649	9.15797	1.25647	4868.45	578.762					7654.81	45585.6	354414
2013-11-06 21:30:00	22.9014	37.7241	7.15407	68.6263	4.74475	0.62001	5.55576	0.842294	6861.1	689.167					31062	153217	246783
2013-11-06 22:30:00	22.4681	36.7959	7.43458	78.3008	5.48347	0.841166	5.98932	0.78649	7508.7	726.129	35.4582	-70.6422	1174.95	-11.7627	96276.6	304300	95700.3	0.020094	0.00176835	0.0558318	0.0485108
2013-11-06 23:30:00	22.27	36.4971	7.53119	80.1483	5.64127	1.11514	10.1519	0.560657	6487.85	672.503	33.8374	-69.4099	898.481	-10.8455	212846	362800	37199.7	0.0176501	0.00097642	0.0584041	0.0533567
2013-11-07 00:30:00	22.5186	36.2053	7.6711	93.122	6.53737	1.39512	14.2327	0.362727	4035.99	519.408	25.1125	-66.6414	618.575	-9.51561	341414	369625	30375	0.0119946	0.000283525	0.0414441	0.0395513
2013-11-07 01:30:00	22.4119	36.1514	7.69203	93.6178	6.58822	1.46253	9.59305	0.215369	1851.33	358.027	18.3158	-66.2587	576.655	-9.45625	371454	369897	30103.3	0.00798459	7.42354e-05	0.0227131	0.0229901
2013-11-07 02:30:00	22.1351	36.3632	7.59263	85.0873	6.0072	1.3479	11.3636	0.353136	2105.45	381.375	20.3144	-66.8605	706.818	-10.0898	320293	369417	30583.5	0.00941774	0.000283552	0.0307552	0.0294526
2013-11-07 03:30:00	21.646	36.7298	7.44678	74.3907	5.28661	1.16218	10.0031	0.417659	4119.56	537.183	31.9832	-68.6036	1009.29	-11.2179	234470	365836	34163.9	0.0156763	0.000612195	0.0528188	0.0493616
2013-11-07 04:30:00	21.1236	37.1645	7.26153	63.4008	4.53534	0.909881	11.6339	0.363599	6141.17	663.057	53.0715	-70.4688	1557.12	-12.3518	123119	329620	70380.1	0.0255241	0.000658288	0.102113	0.0964724
2013-11-07 05:30:00	20.6723	37.5709	7.08771	53.8822	3.87729	0.62512	10.1786	0.268557	8894.68	807.391	77.3817	-71.3779	2350.71	-13.2902	33570.7	158745	241255	0.0361525	0.000523932	0.16279	0.155259
2013-11-07 06:30:00	20.3367	38.0081	6.88229	42.9822	3.10271	0.387869	11.122	0.250247	11679.4	932.45	107	-71.7235	3771.35	-14.4621	6267.69	30635.6	369364	0.0495641	0.00058441	0.288282	0.271928
2013-11-07 07:30:00	20.3404	38.1714	6.80441	37.5542	2.71042	0.313444	10.1353	0.360983	15866.6	1086.74	134.617	-71.5942	4818.38	-15.2633	6159.28	14980.8	385019	0.0656204	0.00216796	0.386256	0.357169
2013-11-07 08:30:00	21.3036	37.1191	7.2439	64.2754	4.57669	0.476608	9.70153	0.831831	15792.2	1073.44	125.542	-70.9538	2486.44	-12.6329	10842.6	62842.2	337158	0.0741783	0.00818268	0.318648	0.275292
2013-11-07 09:30:00	22.5906	36.3855	7.59602	88.7263	6.21627	0.705363	5.98288	0.95303	7525.23	713.649	67.9391	-69.7922	780.083	-9.64737	52529.7	219035	180965	0.0428465	0.00645672	0.132244	0.113314
2013-11-07 10:30:00	23.5306	36.3886	7.61322	92.9	6.40051	1.00945	11.9366	1.17712	5272.96	600.765	39.5986	-67.7182	755.977	-9.80272	165637	350265	49735.3	0.0279127	0.0065324	0.0859861	0.0734228
2013-11-07 11:30:00	23.57	36.2464	7.6489	97.861	6.74458	1.379	27.7671	1.95315	4239.83	531.921	28.6864	-66.7857	722.117	-9.43876	333700	369364	30636.3	0.0267942	0.0106375	0.085027	0.0687081
2013-11-07 12:30:00	22.8927	35.878	7.73924	101.139	7.06712	1.70887	39.5217	2.85909	2565.02	415.618	18.3413	-65.3432	593.829	-8.37097	475968	370104	29895.6	0.0229587	0.0127405	0.0644816	0.0520699
2013-11-07 13:30:00	22.8397	35.7638	7.76754	103.096	7.21542	1.91252	20.8812	3.77986	1287.06	293.01	11.2489	-63.9818	537.455	-7.95152	564052	370132	29867.9	0.0172501	0.0111643	0.036	0.028571
2013-11-07 14:30:00	23.5528	35.826	7.74339	104.407	7.21424	1.91257	11.5097	4.00308	699.003	215.235	9.35268	-63.3793	574.456	-7.97397	563982	370132	29867.8	0.0159595	0.0105733	0.0266155	0.0221937
2013-11-07 15:30:00	25.2611	36.2247	7.70017	108.136	7.23856	1.80179	23.7851	3.90193	893.356	237.356	13.4228	-67.9123	701.082	-8.37354	515215	370125	29875.1	0.024812	0.0162879	0.0448054	0.0381876
2013-11-07 16:30:00	25.5758	36.5744	7.61212	105.794	7.03085	1.60145	45.9907	4.06934	1582.64	315.257	16.657	-71.5798	832.262	-9.27415	430697	370052	29947.5	0.035235	0.0234095	0.0687028	0.0608276
2013-11-07 17:30:00	25.7224	36.7759	7.55678	99.761	6.60822	1.27214	66.1678	3.65604	1794.61	337.761	18.9622	-73.1262	954.149	-9.66134	285220	368153	31847.1	0.0334092	0.0214404	0.0864621	0.0735011
2013-11-07 18:30:00	25.4763	37.2393	7.37941	85.372	5.66059	0.899686	29.2514	3.34912	2009.35	356.904	27.0837	-72.3248	1363.63	-11.0008	119988	322002	77998.5	0.0432987	0.0262891	0.10969	0.0906166
2013-11-07 19:30:00	24.1718	37.7528	7.11814	70.6822	4.77856	0.601115	18.0647	2.4859	3089.76	452.254	47.9849	-72.0099	2260.4	-12.9228	28184.2	140185	259815	0.0549918	0.0262741	0.176223	0.140987
2013-11-07 20:30:00	23.1903	38.2171	6.94661	62.1508	4.26339	0.407054	9.66949	0.946055	4877.93	572.374	68.6174	-72.2673	3350.77	-13.9969	6229.34	34456.8	365543	0.0441773	0.00758981	0.184147	0.162141
2013-11-07 21:30:00	22.7256	38.3601	6.88398	57.6169	3.98	0.415936	9.11254	0.312154	8499.03	765.227	85.286	-72.0542	4040.49	-14.6159	6754.49	37840.5	362160	0.0424894	0.000834801	0.192379	0.183161
2013-11-07 22:30:00	22.8726	37.3598	7.20695	70.3703	4.88034	0.598054	6.37593	0.402836	9605.55	816.24	84.9746	-71.4217	2765.68	-13.093	26726.3	136361	263639	0.0439041	0.00118404	0.14904	0.141556
2013-11-07 23:30:00	22.8808	36.6785	7.45661	77.9992	5.42517	0.814419	6.5978	0.174388	6995.27	692.768	54.6602	-69.7433	1023.5	-10.6235	86635.4	290902	109098	0.026036	0.000375367	0.0805775	0.0813401
2013-11-08 00:30:00	22.83	36.5562	7.47797	77.7144	5.41542	1.08129	8.91339	0.149974	5657.94	625.367	42.3297	-67.1802	970.994	-10.545	197361	360416	39584.4	0.019507	0.000200828	0.0594658	0.0611253
2013-11-08 01:30:00	23.0969	36.3289	7.61034	89.4627	6.2128	1.33166	10.681	0.347032	4013.82	518.895	31.1946	-67.0684	710.115	-9.64415	312896	369289	30710.7	0.0152806	0.000351284	0.0467953	0.0453659
2013-11-08 02:30:00	22.9205	36.3253	7.59508	87.3983	6.09025	1.34272	6.0278	0.280765	2280.2	393.748	24.4201	-67.4232	688.001	-9.67171	318001	369411	30588.5	0.0113862	0.000173201	0.028065	0.0283231
2013-11-08 03:30:00	22.5254	36.5638	7.48712	78.8153	5.52025	1.2244	8.23153	0.270301	2917.23	446.067	29.0719	-67.5839	891.947	-10.6117	263414	367912	32087.7	0.0135506	0.000170084	0.0398209	0.0395189
2013-11-08 04:30:00	21.9197	36.8422	7.36068	69.7593	4.93161	1.05236	9.02797	0.281637	5080.29	598.63	40.067	-68.0077	1236.78	-11.6018	183951	358984	41016.1	0.0188672	0.000270332	0.0632119	0.0616663
2013-11-08 05:30:00	21.3675	37.2469	7.18924	60.6712	4.32034	0.820541	9.59746	0.209266	7695.16	742.266	60.7378	-69.2203	1865.51	-12.6878	88928.5	293631	106369	0.0279566	0.00025798	0.107788	0.105882
2013-11-08 06:30:00	20.8457	37.618	7.01356	52.0466	3.73542	0.561834	10.2446	0.00791453	9944.3	851.559	86.4278	-70.4852	2686.02	-13.5671	21515.3	112985	287015	0.0370285	5.26556e-06	0.174281	0.175898
2013-11-08 07:30:00	20.5886	37.952	6.84754	43.2271	3.10966	0.354969	10.2271		12377.5	955.547	116.054	-71.0991	4020.1	-14.6417	5788.8	22476.1	377524	0.0496306	0	0.285977	0.282964
2013-11-08 08:30:00	20.8758	37.9796	6.82059	41.1831	2.94636	0.333202	10.1531	0.880986	16247.4	1092.11	140.928	-70.9034	4701.12	-15.0491	5877.61	18254.7	381745	0.0736657	0.00564432	0.39942	0.365065
2013-11-08 09:30:00	22.7665	36.8672	7.35297	74.5508	5.18492	0.499146	6.82542	1.35325	15883	1055.07	113.314	-70.2302	1996.74	-12.0014	12529.9	72659.8	327340	0.0833257	0.0195776	0.283509	0.234119
2013-11-08 10:30:00	24.1686	36.4814	7.59525	92.5483	6.30373	0.715559	9.38203	1.63402	8094.4	731.333	56.8598	-69.1091	833.035	-9.56726	55304	226701	173299	0.0480836	0.0148418	0.146672	0.118809
2013-11-08 11:30:00	24.9533	36.4851	7.59	95.7898	6.43653	1.01568	12.7724	2.26704	5001.41	572.866	34.4398	-67.4411	843.975	-9.7417	168358	351280	48720.4	0.0384467	0.0178911	0.0949544	0.0767321
2013-11-08 12:30:00	24.5971	36.3602	7.61203	98.6932	6.67856	1.381	29.6853	2.83642	4163.69	520.146	26.4031	-67.0951	766.457	-9.24603	334616	369386	30614.5	0.0373275	0.0215655	0.0896108	0.0754256
2013-11-08 13:30:00	23.9188	36.1721	7.67144	99.4373	6.81373	1.67312	34.2473	3.61593	2348.99	391.061	18.6737	-66.9958	661.632	-8.83807	460897	370097	29903.4	0.0315063	0.0200393	0.0700913	0.0582178
2013-11-08 14:30:00	24.1325	36.2394	7.66322	99.989	6.82415	1.80437	15.5347	3.72231	1824.99	347.929	15.5041	-65.8942	684.058	-8.87015	516194	370126	29874.2	0.0271761	0.0175383	0.0484117	0.0401829
2013-11-08 15:30:00	25.0058	36.2824	7.65525	101.023	6.78898	1.77687	13.5061	4.44166	1761.2	338.243	15.9728	-68.1124	749.629	-8.5465	504485	370123	29877.3	0.0384242	0.0261754	0.0546499	0.0501886
2013-11-08 16:30:00	26.807	36.6942	7.59339	106.068	6.90212	1.66999	26.4293	4.75347	1807.58	334.67	20.8537	-70.0553	935.046	-9.06035	459594	370099	29901.3	0.0308865	0.0170418	0.0531391	0.0539206
2013-11-08 17:30:00	26.5255	36.8047	7.54678	101.507	6.63068	1.46987	50.7831		2608.73	401.384	22.6084	-71.8914	1013	-9.39546	374286	369859	30140.9	0.0103586	0	0.050442	0.0507014
2013-11-08 18:30:00	26.3622	37.0705	7.44508	90.7729	5.93771	1.16092	46.3783		2238.71	373.675	25.3246	-75.8756	1208.16	-10.152	233983	364911	35088.8	0.0116648	0	0.0596562	0.0596551
2013-11-08 19:30:00	25.4436	37.4204	7.24263	75.5949	5.01136	0.837042	19.0656	1.49033	2488.05	396.358	35.7247	-74.0684	1754.75	-11.983	95509.4	299071	100929	0.0239552	0.00496943	0.0869754	0.0783526
2013-11-08 20:30:00	24.2695	37.93	7.00246	63.1424	4.25873	0.558029	12.0581	1.1902	3721.22	493.514	50.8775	-71.9264	2940.37	-13.7276	20838	110177	289823	0.0360084	0.00704843	0.135136	0.114656
2013-11-08 21:30:00	23.457	38.4371	6.82737	55.7949	3.80551	0.360751	8.31	1.6314	5184.44	588.427	69.2631	-71.8172	4364.02	-14.9407	5767.8	23604.9	376395	0.0569748	0.0165008	0.213127	0.172972
2013-11-08 22:30:00	23.0849	38.5825	6.77153	52.3017	3.58602	0.345847	7.95068	0.671394	8819.38	776.587	94.9017	-71.8286	5105.05	-15.6314	5888.12	20875.3	379125	0.054425	0.00445958	0.233722	0.210945
2013-11-08 23:30:00	23.4231	37.4097	7.1728	68.8898	4.72907	0.523607	8.55288	0.513573	9700.88	814.086	73.3913	-71.1256	2492.1	-13.692	15241.3	86136.7	313863	0.0419605	0.00329638	0.165928	0.150866
2013-11-09 00:30:00	23.5445	36.606	7.51076	82.328	5.66263	0.737468	6.4278	1.36284	6852.67	680.739	49.4318	-69.8883	888.913	-10.5015	61481.8	242920	157080	0.0362617	0.00814808	0.10587	0.0861207
2013-11-09 01:30:00	23.6583	36.5785	7.52305	82.5466	5.66669	0.9997	7.35441	1.72818	5890.79	632.206	36.3343	-68.2003	852.417	-10.4181	160826	351000	48999.9	0.0308786	0.0100597	0.0818001	0.0641676
2013-11-09 02:30:00	23.9597	36.5506	7.57093	87.1678	5.9561	1.19241	5.71254	1.90693	4640.44	556.131	29.6278	-68.5825	766.004	-10.1056	248516	367247	32752.6	0.0269707	0.0101324	0.0616654	0.0478321
2013-11-09 03:30:00	23.7783	36.5732	7.53415	82.6525	5.66407	1.19271	3.76576	1.93222	3857.19	507.695	28.462	-69.0557	804.8	-10.3305	248655	367325	32674.8	0.026043	0.00990254	0.0555558	0.0422941
2013-11-09 04:30:00	23.3847	36.6053	7.49754	79.9271	5.51407	1.11041	5.24068	2.43446	4274.55	536.557	30.3761	-68.7039	865.557	-10.5057	210345	364081	35919.5	0.0333734	0.0159157	0.0734942	0.0555136
2013-11-09 05:30:00	22.7185	36.7486	7.41415	74.0729	5.16466	0.980627	6.75017	1.46486	5154.63	596.535	35.3247	-68.3734	1013.17	-11.064	151961	350148	49851.6	0.0261995	0.00679913	0.0736634	0.0586092
2013-11-09 06:30:00	22.0839	37.092	7.25051	65.0924	4.57966	0.787569	10.8051	0.8048	7037.19	704.321	49.0141	-68.6419	1604.56	-12.355	77023.9	277200	122800	0.0283943	0.00327029	0.108193	0.0951328
2013-11-09 07:30:00	21.8325	37.7329	6.98432	53.6805	3.78127	0.571293	10.0775	0.770795	10686.5	870.174	86.0934	-70.3574	3163.89	-14.2494	22436.8	117933	282067	0.0500273	0.00509299	0.211075	0.185285
2013-11-09 08:30:00	21.9887	38.2173	6.81322	46.0398	3.22619	0.378886	9.44831	1.13527	14405.3	1011.36	129.085	-71.4766	4709.97	-15.2715	5952.25	27861.2	372139	0.0898204	0.0197961	0.388764	0.329428
2013-11-09 09:30:00	22.5661	38.2722	6.78568	46.8898	3.25034	0.322453	10.351	1.22856	18155.1	1128.32	155.594	-71.4895	5269.99	-16.0059	5962.27	16285.8	383714	0.111089	0.0240812	0.488841	0.412584
2013-11-09 10:30:00	24.0019	37.385	7.16305	67.2508	4.56144	0.45981	6.63881	2.48328	18350.4	1116.49	142.921	-71.0073	3054.19	-13.5167	9145.04	54084.7	345915	0.167508	0.0794507	0.454275	0.352285
2013-11-09 11:30:00	25.3077	36.5991	7.60525	93.0949	6.21559	0.661825	6.47186		10411.4	812.024	71.4279	-70.0964	796.3	-9.79815	41011.7	186152	213848
2013-11-09 12:30:00	25.686	36.5345	7.63475	96.3237	6.39331	0.943368	13.7224	2.99511	4467.45	534.24	35.0258	-68.1087	697.527	-9.57927	137279	337162	62838.4	0.0530505	0.0306133	0.113524	0.0928798
2013-11-09 13:30:00	25.3803	36.5186	7.63305	99.1229	6.61305	1.28197	23.3	3.49212	3295.91	460.808	22.6793	-70.6136	669.698	-9.83425	289781	368383	31617.1	0.0378982	0.02376	0.0802332	0.0662268
2013-11-09 14:30:00	24.7606	36.4663	7.63076	98.9712	6.67271	1.55029	31.5919	4.78433	2307.25	386.358	18.4527	-70.6701	666.424	-10.2129	409127	370017	29982.8	0.0099097	0.00179287	0.0357971	0.035831
2013-11-09 15:30:00	24.8687	36.4815	7.64339	99.2458	6.67831	1.65865	12.3164		2047.19	365.6	16.0572	-72.3016	674.329	-9.79412	454860	370097	29902.8	0.00678093	0	0.017825	0.0196114
2013-11-09 16:30:00	25.5677	36.5693	7.61322	99.5797	6.62017	1.63341	11.9258		1991.69	358.023	16.3117	-73.0603	716.014	-9.77469	444304	370087	29913.4	0.00703165	0	0.0178431	0.019752
2013-11-09 17:30:00	27.0878	36.9808	7.55229	100.61	6.50517	1.53867	27.4514	2.69569	2153.14	363.304	22.559	-72.9844	873.548	-10.3687	404268	370013	29987.1	0.0193048	0.00720749	0.0513131	0.0468148
2013-11-09 18:30:00	26.5235	37.0789	7.51432	93.978	6.13102	1.36679	42.1881	2.56176	2850.37	420.632	26.947	-74.849	924.387	-10.6794	328680	369469	30531.3	0.0325152	0.0158669	0.0944285	0.0772866
2013-11-09 19:30:00	25.8768	37.3849	7.37941	81.6195	5.37212	1.10327	24.5163	2.68296	2913.75	427.334	30.892	-73.5044	1194.49	-11.407	207370	362198	37802.3	0.0405198	0.0211505	0.102643	0.0846524
2013-11-09 20:30:00	25.1909	37.7142	7.18263	68.6881	4.56424	0.824842	13.2931	3.03609	2962.94	434.811	40.9339	-73.1287	1836.74	-12.6066	90593.6	295243	104757	0.0608964	0.0352779	0.138448	0.112428
2013-11-09 21:30:00	24.3753	38.11	6.97737	58.6737	3.94415	0.573824	15.3171	2.70824	4336.76	532.434	55.2141	-73.2009	3070.86	-13.914	23069.6	120200	279800	0.0730095	0.037865	0.207887	0.169481
2013-11-09 22:15:00	23.8508	38.4374	6.82008	52.439	3.54864	0.421371	11.1919	2.10312	5370.27	597.511	66.9653	-73.4712	4312.57	-14.9905	7062.65	39879.9	360120	0.0688045	0.0285754	0.229954	0.187442
2013-11-09 22:30:00	23.704	38.5403	6.78305	50.8195	3.44627	0.383634	12.0142	1.57995	6177.45	641.173	71.2891	-73.3217	4702.46	-15.3232	5837.02	28513	371487	0.0586504	0.017686	0.23785	0.198569
2013-11-09 23:15:00	23.4289	38.7036	6.73034	47.2822	3.22254	0.351044	15.3356	1.03586	8952.3	776.71	86.3304	-72.4662	5550.46	-15.8298	5430.18	20686.9	379313	0.0581108	0.010318	0.296478	0.257736
2013-11-09 23:30:00	23.4276	38.6758	6.73059	46.4763	3.16703	0.370253	13.0331	1.13788	10339.4	838.257	90.88	-72.2406	5588.57	-15.8139	5552.26	24959.2	375041	0.0631153	0.0120605	0.292347	0.250975
2013-11-10 00:15:00	23.6014	37.9469	6.96831	55.4203	3.78017	0.481507	5.88271	1.97146	12098.5	907.78	96.0692	-72.0558	4118.97	-14.506	10670.2	63197.6	336802	0.0923682	0.0353668	0.265671	0.209537
2013-11-10 00:30:00	23.6677	37.5186	7.1522	63.9144	4.36661	0.523054	4.83678	2.29059	11938.8	898.37	95.8614	-72.1058	3654.02	-14.1041	14795.2	84604	315396	0.101619	0.0439982	0.269246	0.207173
2013-11-10 01:15:00	23.7421	36.7239	7.54712	82.2932	5.63805	0.65082	4.2522	2.42922	8651.47	753.939	40.2889	-70.461	852.007	-10.945	37868.4	177344	222656	0.0456012	0.0217156	0.106378	0.0805437
2013-11-10 01:30:00	23.7091	36.6491	7.57992	83.6059	5.7322	0.70509	5.68034	2.56263	6621.85	659.612	37.9504	-70.1138	809.121	-10.681	52133.2	219280	180720	0.0441752	0.0217709	0.10457	0.0795011
2013-11-10 02:15:00	23.6561	36.6007	7.60653	84.7432	5.81864	0.888163	7.76915	2.6132	4439.75	546.588	27.8945	-68.0139	684.889	-9.95624	114042	324327	75673.1	0.0336122	0.0175794	0.0782623	0.0609037
2013-11-10 02:30:00	23.6887	36.5963	7.61093	85.2966	5.85568	0.945676	7.31186	2.43794	4045	521.778	25.6052	-67.396	672.227	-9.87653	137365	341637	58363.1	0.0296248	0.0149612	0.0669177	0.0528349
2013-11-10 03:15:00	23.8327	36.5969	7.61669	86.9949	5.95653	1.08717	6.05797	1.07249	3201.68	461.58	21.0209	-66.8392	638.837	-9.66336	199679	362446	37554.3	0.0147022	0.00379858	0.0350873	0.0306467
2013-11-10 03:30:00	23.8458	36.5994	7.61339	86.878	5.94559	1.11654	4.85068	0.599895	2850.12	436.565	20.2922	-67.0241	637.501	-9.69076	213179	364437	35563.3	0.010694	0.000710474	0.0259145	0.0239883
2013-11-10 04:15:00	23.7696	36.6058	7.58797	84.0627	5.76347	1.12925	2.99712	0.798697	2825.61	436.939	19.774	-67.4639	654.177	-9.81147	219057	365168	34831.9	0.0111922	0.00122492	0.0238664	0.0210033
2013-11-10 04:30:00	23.7292	36.6117	7.58153	82.9729	5.69347	1.11611	3.35186	1.12916	3007.83	451.82	20.0559	-67.4043	664.025	-9.84265	212953	364524	35475.9	0.0130171	0.0025318	0.0287885	0.0237252
2013-11-10 05:15:00	23.5725	36.6382	7.57636	81.5517	5.60847	1.06506	5.63932	1.32535	3467.8	486.248	22.1353	-67.2237	694.269	-9.94963	189470	361124	38875.7	0.0153895	0.00352329	0.0391815	0.0316879
2013-11-10 05:30:00	23.4914	36.6508	7.56754	81.0839	5.58314	1.04154	6.0378	1.26082	3695.69	502.017	22.9855	-67.2271	700.808	-9.98185	178818	358891	41108.6	0.0155941	0.00328666	0.0411816	0.0334997
2013-11-10 06:15:00	23.1752	36.7112	7.52831	77.8949	5.38949	0.956615	6.45678	1.15307	3941.45	518.393	25.7911	-67.186	750.015	-10.2767	141446	346430	53570.3	0.0167989	0.00317441	0.0471722	0.0391721
2013-11-10 06:30:00	23.0774	36.7668	7.50754	76.3017	5.28602	0.927273	6.58593	1.07435	4176.82	532.573	27.6627	-67.3084	797.428	-10.4585	129107	339696	60303.6	0.0158849	0.00212334	0.0453133	0.0404682
2013-11-10 07:15:00	22.8236	36.8868	7.43381	71.4466	4.96983	0.827022	8.16186	1.13178	5346.28	604.587	36.215	-68.1713	968.599	-10.9215	90219.9	301547	98453.5	0.0175812	0.00100138	0.0578777	0.0572331
2013-11-10 07:30:00	22.7668	36.9469	7.40161	69.828	4.86025	0.786963	9.53407	1.41949	6057.56	645.705	39.9595	-68.4826	1066.29	-11.117	76349.9	278748	121252	0.0237349	0.00397287	0.0808334	0.0727372
2013-11-10 08:15:00	22.8138	37.413	7.19373	61.2907	4.25136	0.653237	11.3593	2.04295	7982.45	741.309	61.543	-69.7002	2029.31	-12.5746	38186.7	179448	220552	0.05948	0.0238692	0.191925	0.151968
2013-11-10 08:30:00	22.8827	37.59	7.08508	57.0703	3.95008	0.607061	10.7324	2.15892	9735.59	815.392	74.607	-70.0584	2826.79	-13.4522	28344.2	143069	256931	0.0766088	0.0329057	0.237616	0.187662
2013-11-10 09:15:00	23.0976	37.9864	6.86746	48.6085	3.34381	0.475198	7.01288	2.32285	14776.7	1003.43	119.05	-70.8145	4692.78	-15.1266	10080.7	60081.1	339919	0.12849	0.0574062	0.364575	0.279982
2013-11-10 09:30:00	23.1471	38.0617	6.84814	48.5788	3.33797	0.438444	5.62746	2.41615	16883	1077.67	128.702	-71.0621	4723.65	-15.1413	7484.91	44597.2	355403	0.140116	0.062838	0.389528	0.293693
2013-11-10 10:15:00	23.445	38.204	6.81008	50.6975	3.45831	0.375669	5.36492	2.57222	18466.5	1131.49	142.962	-71.7055	4806.84	-15.3476	5309.57	25390.7	374609	0.161331	0.0738539	0.468226	0.351998
2013-11-10 10:30:00	23.6965	38.2159	6.80661	51.1932	3.47636	0.378003	5.93847	2.57222	18522.1	1128.92	145.77	-71.8249	4918.52	-15.4602	5351.37	25983.9	374016	0.165513	0.0757682	0.485594	0.367571
2013-11-10 11:15:00	24.6073	37.9639	6.89475	55.0458	3.68771	0.45158	6.26492	2.57222	18909.7	1126.09	145.473	-71.6607	4610.68	-15.2208	8284.19	49708.2	350292	0.168687	0.0772215	0.460094	0.34973
2013-11-10 11:30:00	25.0211	37.6403	7.03449	62.4856	4.16161	0.487325	5.62525	2.57222	19014.2	1121.69	139.927	-71.49	3997.62	-14.5877	11019	65448.9	334551	0.163742	0.0749575	0.420928	0.319172
2013-11-10 12:15:00	26.2823	36.749	7.50966	89.2441	5.85669	0.607392	3.42203	2.57222	15646.7	992.525	100.894	-71.0664	1484.94	-10.992	28367.9	143153	256847	0.121022	0.0554016	0.256138	0.192645
2013-11-10 12:30:00	26.5809	36.6905	7.56839	92.7297	6.05915	0.654686	5.06034	2.57222	12033.7	856.291	84.8354	-71.0367	1038.67	-10.0006	38749.4	180579	219421	0.102123	0.0467499	0.218382	0.165712
2013-11-10 13:15:00	27.2669	36.6698	7.60288	96.3941	6.22568	0.821	11.8376	2.57222	6185.72	612.969	50.0402	-71.7538	782.141	-9.34785	88933.3	294501	105499	0.0603598	0.0276315	0.146263	0.114968
2013-11-10 13:30:00	27.3666	36.666	7.60568	96.9686	6.25254	0.884041	11.7259	2.57222	5069.51	557.821	42.5244	-72.9644	767.986	-9.35602	112693	321593	78407.1	0.051088	0.023387	0.12129	0.0952851
2013-11-10 14:15:00	27.0636	36.6089	7.62754	98.7415	6.40203	1.09648	14.5031	2.57222	4219.25	507.798	26.591	-73.4971	698.564	-9.3236	204327	361402	38597.7	0.0308614	0.0141277	0.0734997	0.0575057
2013-11-10 14:30:00	26.7574	36.5895	7.62415	99.1593	6.46178	1.17432	17.5585	2.57222	3663.69	473.317	23.4969	-72.1091	679.361	-9.34214	240135	365672	34328.3	0.0267843	0.0122613	0.0668486	0.0523526
2013-11-10 15:15:00	25.5851	36.5315	7.63975	99.4	6.6072	1.40477	28.3125	2.57222	2600.26	404.417	18.5183	-74.8943	623.702	-9.30051	345529	369618	30382.1	0.01998	0.00914643	0.0569385	0.0444895
2013-11-10 15:30:00	25.2581	36.508	7.65263	98.8339	6.60619	1.46796	28.9714	2.57222	2282.11	381.254	17.2278	-77.5044	603.64	-9.27511	373534	369866	30134.2	0.0182689	0.0083631	0.052814	0.041122
2013-11-10 16:30:00	24.8367	36.4817	7.66	96.4102	6.49305	1.57793	13.3881	2.57222	1764.85	337.796	13.8504	-78.9572	576.437	-9.61678	421002	370055	29945.5	0.0140562	0.00643461	0.0337612	0.0252314
2013-11-10 16:40:00	24.8649	36.4809	7.66093	96.3636	6.48695	1.57629	10.372	2.57222	1764.85	337.796	13.6884	-78.4344	576.438	-9.69593	420307	370053	29946.8	0.0138745	0.00635147	0.0316917	0.0234587
2013-11-10 17:15:00	24.9893	36.5002	7.64347	95.0347	6.38305	1.54957	11.5081	2.57222	2086.65	365.777	13.4356	-79.4511	590.776	-9.91147	408975	370030	29970.3	0.0136199	0.0062349	0.0315037	0.0234484
2013-11-10 17:30:00	25.0826	36.5347	7.63585	93.9017	6.29695	1.53542	15.0851	2.57222	2247.89	380.306	13.83	-80.4521	611.353	-9.99825	402938	370014	29985.8	0.0141256	0.00646641	0.0348944	0.0263625
2013-11-10 18:15:00	25.5073	36.6985	7.58746	89.839	5.97661	1.46797	23.9024	2.57222	2428.6	394.453	17.7794	-79.9434	703.691	-10.2763	373786	369902	30097.5	0.0190385	0.00871545	0.0520788	0.0403652
2013-11-10 18:30:00	25.6237	36.764	7.56322	88.2364	5.85653	1.43647	26.9934	2.57222	2531.86	401.841	19.7358	-78.5566	738.197	-10.3226	359938	369819	30180.9	0.0214529	0.00982068	0.0604389	0.0471454
2013-11-10 19:15:00	25.8234	37.1377	7.47076	80.9288	5.33831	1.30966	26.8841	2.57222	2652.49	410.65	25.0586	-75.8505	938.666	-10.8658	302754	369044	30956.1	0.0279973	0.0128166	0.0794227	0.0621934
2013-11-10 19:30:00	25.8381	37.2939	7.42737	78.1102	5.1461	1.25734	23.4814	2.55304	2805.35	421.677	27.1138	-75.6198	1043.83	-11.1913	278638	368339	31660.5	0.0302788	0.013754	0.0838184	0.0654512
2013-11-10 20:15:00	25.7701	37.6675	7.2911	70.3517	4.63	1.07817	14.1619	1.8738	3247.65	453.996	33.3391	-74.9507	1402.15	-12.2288	195866	360491	39509.2	0.0309931	0.0110136	0.0843723	0.0682857
2013-11-10 20:30:00	25.7203	37.7715	7.24907	67.6771	4.45508	1.0108	12.1358	1.61483	3536.8	473.135	37.9042	-74.6327	1557.25	-12.5012	165774	352389	47611.1	0.0320798	0.00937247	0.0888094	0.0728936
2013-11-10 21:15:00	25.4658	38.0803	7.12483	59.4763	3.92941	0.797831	10.9222	0.936463	4828.79	552.644	60.9805	-73.4948	2185.78	-12.9909	81336.8	279868	120132	0.0400371	0.00548515	0.129101	0.114709
2013-11-10 21:30:00	25.3492	38.1842	7.07585	56.9271	3.76551	0.72919	10.8607	0.716734	5506.2	593.358	67.9026	-73.1795	2448.93	-13.2058	59418.1	236173	163827	0.0414392	0.00395359	0.139949	0.127918
2013-11-10 22:15:00	24.9922	38.5386	6.92669	49.5119	3.28568	0.547039	8.91102		6431.4	645.845	78.5411	-72.6176	3428.27	-14.1874	18717.3	101665	298335
2013-11-10 22:30:00	24.8742	38.676	6.87585	46.9949	3.12305	0.493575	10.0446		7009.89	676.059	77.4884	-72.5348	3848.36	-14.6608	12260.1	70720.9	329279
2013-11-10 23:15:00	24.5258	39.0344	6.73712	40.8127	2.72314	0.348498	6.23831		8862.46	762.966	93.5015	-72.3762	5445.87	-15.6359	5988.24	21701.2	378299
2013-11-10 23:30:00	24.4289	39.1165	6.70246	39.3212	2.62644	0.311408	4.31729		10131.7	817.243	106.646	-72.3233	6003.02	-15.7733	6400.32	15250.7	384749
2013-11-11 00:30:00	24.244	39.1636	6.63136	34.9907	2.34517	0.27451	10.8737	0.681857	14920.8	996.407	150.438	-72.0164	7523.85		7457.47	10683.7	389316	0.090353	0.0079744	0.447335	0.403795
2013-11-11 01:30:00	24.1638	37.3842	6.93644	55.8669	3.79195	0.438297	6.74492	0.480439	17465.9	1081.31	147.867	-71.4224	5189.87	-14.4737	8202.14	46817.3	353183	0.0827048	0.00397746	0.307073	0.286515
2013-11-11 02:30:00	24.0494	36.2369	7.43636	81.8186	5.59237	0.631683	7.21339	0.46736	12396.1	910.499	105.54	-70.7911	2607.71	-11.8044	33477.9	162364	237636	0.0576671	0.0020213	0.191579	0.180778
2013-11-11 03:30:00	23.9175	36.1457	7.57754	82.3737	5.64661	0.828597	7.71525	0.570249	8266.57	739.359	64.0445	-69.8766	813.594	-9.469	91284	300041	99959	0.0360143	0.00204651	0.111857	0.103181
2013-11-11 04:30:00	23.9967	36.2369	7.59	82.5458	5.64737	1.07592	10.092	0.622565	5240.28	593.339	39.0021	-67.8933	681.343	-9.19964	194855	360241	39758.5	0.0218222	0.0013955	0.0677905	0.0620375
2013-11-11 05:30:00	24.2208	36.3595	7.60263	84.8288	5.77839	1.23977	4.50814	0.664418	4248.1	531.624	27.6648	-68.1327	651.976	-9.08253	270603	368315	31685.3	0.0156012	0.00143339	0.0346087	0.031884
2013-11-11 06:30:00	24.0553	36.3781	7.56169	80.4254	5.49119	1.18985	6.59441	0.831831	3460.92	480.319	26.5242	-68.4072	707.071	-9.43578	247321	367208	32792.1	0.0157071	0.00179525	0.040477	0.0356407
2013-11-11 07:30:00	23.7718	36.4064	7.48339	74.2034	5.08941	1.07551	7.85559	0.57984	4894.46	572.959	29.4783	-67.8687	846.698	-10.2787	194326	361622	38378.4	0.0158988	0.000935396	0.0458627	0.0423475
2013-11-11 08:30:00	23.7236	36.6112	7.30678	65.4373	4.48941	0.914808	10.7454	0.799569	6741.13	674.152	43.114	-69.4012	1488.08	-12.3498	124340	334670	65329.7	0.0261013	0.00297052	0.0866612	0.0764234
2013-11-11 09:30:00	24	36.8818	7.07771	57.6508	3.92949	0.715553	11.6571	1.77353	10988.7	774.391	73.3692	-72.0739	2562.69	-14.014	54576.5	228260	171740	0.0671167	0.0236767	0.211798	0.170347
2013-11-11 10:30:00	24.5232	37.0263	6.88737	52.7686	3.55941	0.519247	11.9227	2.23042	13888	787.83	83.9275	-72.2778	3765.87	-14.8186	14695.9	83543	316457	0.0923018	0.0411814	0.281453	0.227483
2013-11-11 11:30:00	25.4327	37.1169	6.82737	59.8653	3.97881	0.405466	7.37729	2.34029	14901.7	807.471	85.8029	-72.5115	4828.33	-15.642	5732.57	32655.4	367345	0.100266	0.0463408	0.269101	0.217207
2013-11-11 12:30:00	25.8728	37.0689	6.90669	63.2093	4.16644	0.486566	4.95661	1.84764	16227	837.66	87.8524	-72.5083	4706.31	-15.3594	10723.2	64314.1	335686	0.0868735	0.0325286	0.214253	0.174639
2013-11-11 13:30:00	26.5358	36.5626	7.45712	88.2381	5.77347	0.644312	3.47627	1.99936	15581.4	812.464	85.654	-72.5459	3118.86	-13.7053	36322.3	172354	227646	0.0845198	0.0302656	0.174763	0.139754
2013-11-11 14:30:00	26.8559	36.4551	7.59831	96.6051	6.28771	0.868481	8.86864	2.09702	10453.9	650.337	36.1481	-71.0336	876.795	-10.7015	106603	315913	84086.6	0.0400524	0.0172357	0.088018	0.0724714
2013-11-11 15:30:00	26.6412	36.4491	7.61568	99.1237	6.4761	1.15966	15.4949	2.53473	5857.98	492.131	31.7315	-70.0555	705.586	-9.68858	233379	365009	34991.3	0.0391888	0.0193593	0.0887734	0.0718485
2013-11-11 16:30:00	25.9015	36.4317	7.65093	101.379	6.70712	1.44099	27.9468	4.56896	4004.46	407.457	24.8089	-69.8954	596.509	-9.15964	361723	369795	30205.4	0.0678781	0.046125	0.103799	0.0982111
2013-11-11 17:30:00	25.4199	36.3832	7.65169	98.3712	6.56347	1.58635	15.6603	3.42062	2400.37	319.807	17.5651	-72.0826	565.415	-9.29676	424549	370060	29939.8	0.0305816	0.0185711	0.0535961	0.0459563
2013-11-11 18:30:00	25.459	36.4238	7.63339	96.2983	6.41585	1.57123	10.7217	3.02825	2002.8	292.902	16.4129	-74.0124	581.475	-9.53125	418156	370048	29951.6	0.0221988	0.0126142	0.0426231	0.0335768
2013-11-11 19:30:00	25.7097	36.594	7.57602	90.4025	5.99483	1.47456	27.8642	2.32023	2592.52	330.652	21.6371	-72.4489	687.535	-10.0678	376628	369913	30087.4	0.0225312	0.0098017	0.0633847	0.0510432
2013-11-11 20:30:00	25.6077	36.9786	7.40229	76.3831	5.06466	1.28217	23.5995	0.922512	3225.01	370.081	34.4261	-73.1117	1047.41	-11.3898	290061	368657	31343.3	0.0219179	0.00281448	0.0754633	0.0673329
2013-11-11 21:30:00	25.3477	37.3877	7.21924	62.8212	4.17475	1.02835	12.3414	0.38191	4564.37	439.91	54.6015	-71.8458	1725.78	-12.8159	173469	355122	44877.8	0.0293352	0.000783263	0.0933226	0.0903833
2013-11-11 22:30:00	25.0228	37.6997	7.01322	51.6347	3.44288	0.754075	11.4803	0.520548	6341.81	522.144	75.7211	-71.1914	2784.34	-13.7249	67076.5	252948	147052	0.0429157	0.00212295	0.152918	0.142923
2013-11-11 23:30:00	24.6611	38.0932	6.81983	43.4551	2.90644	0.497069	10.6024	0.500493	7810.57	584.058	95.6859	-71.3468	4461.61	-14.9495	12934.4	73579.7	326420	0.0537159	0.00295635	0.219347	0.204874
2013-11-12 00:30:00	24.3343	38.4756	6.6572	37.2898	2.50347	0.320427	17.1707	0.48567	10864.5	690.796	121.024	-71.4695	6528.78	-15.7606	6138.06	16359	383641	0.0686751	0.00496763	0.406828	0.374244
2013-11-12 01:30:00	24.2157	38.463	6.63737	35.6559	2.39932	0.321753	9.02525	0.966981	15171.3	820.871	145.317	-71.3796	7219.44		6148.37	16659.9	383340	0.0983061	0.0160767	0.411076	0.360887
2013-11-12 02:30:00	24.4861	37.0555	7.10695	64.4619	4.35347	0.471088	7.76932	0.461256	16601.9	857.794	142.816	-70.851	4149.43	-13.4284	9956.61	58893.2	341107	0.079894	0.00403908	0.294912	0.277304
2013-11-12 03:30:00	24.5777	36.4006	7.54525	82.8966	5.60839	0.668458	6.53492	0.35052	12589.9	743.39	105.195	-69.7944	1354.75	-10.4318	42270.8	191474	208526	0.0557496	0.00132284	0.170724	0.167112
2013-11-12 04:30:00	24.5283	36.3683	7.54907	80.5763	5.45873	0.905386	9.17017	0.330465	8514.62	609.258	65.095	-68.2779	763.89	-9.1998	121246	328508	71492.3	0.0339298	0.000656582	0.103589	0.101506
2013-11-12 05:30:00	24.6337	36.3534	7.57924	83.1619	5.62186	1.19798	14.311	0.385397	5575.05	493.798	43.0008	-66.7938	682.79	-8.97387	251093	366662	33338.1	0.0225017	0.000624473	0.074537	0.0718361
2013-11-12 06:30:00	24.7036	36.3181	7.60093	85.7822	5.79712	1.37947	7.1222	0.364471	4021.62	418.198	31.3933	-66.6983	619.96	-8.75804	334649	369628	30372.2	0.0161128	0.000459596	0.0388742	0.038617
2013-11-12 07:30:00	24.6053	36.3489	7.57169	82.0686	5.55288	1.34686	7.75322	0.403708	3097.11	367.558	27.9601	-67.1907	671.948	-9.17038	319884	369439	30560.6	0.014367	0.000447541	0.0366037	0.0357861
2013-11-12 08:30:00	24.4408	36.5903	7.46475	75.7873	5.13381	1.23146	6.93085	1.25908	4227.77	427.542	33.3272	-68.2948	894.951	-10.3954	266704	368054	31946.5	0.0244787	0.00587597	0.0606648	0.0502673
2013-11-12 09:30:00	24.1336	36.7458	7.3611	73.8754	5.31161	1.06618	10.4142	2.47108	6893.16	551.708	49.0966	-69.3932	1283.22	-11.6881	190175	360448	39551.7	0.0585652	0.0286215	0.138976	0.110193
2013-11-12 10:30:00	24.3621	36.9443	7.21076	62.2169	4.20975	0.858258	11.9973	2.16939	9178.56	637.153	71.2618	-70.9532	1745.63	-12.3733	102399	313125	86874.7	0.0761922	0.0333579	0.210084	0.16689
2013-11-12 11:30:00	24.3676	37.1098	7.08169	58.6364	3.96381	0.631195	10.9336	2.39609	10653.2	686.561	91.1217	-72.1639	2379.41	-12.8244	33826.7	162380	237620	0.104174	0.0479757	0.295029	0.234138
2013-11-12 12:30:00	24.5664	37.2919	6.96644	59.5297	4.00983	0.445707	8.63153	1.99761	11753.8	720.557	108.519	-72.4962	3159.82	-13.7945	7682.47	46649.1	353351	0.110686	0.0443195	0.333258	0.269493
2013-11-12 13:30:00	25.0603	37.2624	6.98076	65.461	4.37161	0.460463	5.56119	2.94803	12611.8	741.447	121.148	-72.233	3233.13	-14.0425	8652.88	52601.4	347399	0.174476	0.0965833	0.394148	0.311381
2013-11-12 14:30:00	26.155	36.5776	7.28992	79.5424	5.23424	0.604408	6.02746	3.62814	13607.5	761.055	117.916	-71.9735	2456	-12.8404	27474.4	140309	259691	0.264632	0.163703	0.403814	0.371449
2013-11-12 15:30:00	26.9298	36.2858	7.5211	93.3881	6.07873	0.792403	4.80763	3.91155	12382.1	717.687	107.083	-71.5825	1507.34	-9.69239	78663.5	280021	119979	0.165459	0.0877983	0.233119	0.235555
2013-11-12 16:30:00	27.0464	36.2074	7.55398	95.339	6.19653	1.04649	11.4725		8969.77	602.79	67.2761	-70.7242	890.102	-8.67993	181736	356613	43386.8	0.0331993	0	0.0920894	0.100155
2013-11-12 17:30:00	25.9853	36.1991	7.59983	97.6602	6.46203	1.34984	19.7368		4535.23	429.456	41.1017	-68.2373	728.4	-8.54333	320900	369296	30703.5	0.019471	0	0.0616115	0.0655915
2013-11-12 18:30:00	25.5125	36.1957	7.62831	96.9737	6.46492	1.52539	15.7414		2573.01	330.237	19.0264	-66.9307	583.548	-9.40902	398640	370001	29998.5	0.00834854	0	0.024734	0.0266301
2013-11-12 19:30:00	25.418	36.2264	7.60754	94.4729	6.30712	1.52294	10.7075		2108.88	299.569	17.5225	-66.525	584.551	-9.33235	397605	370000	30000.4	0.00759368	0	0.0189981	0.0210908
2013-11-12 20:30:00	25.412	36.3238	7.54263	88.0288	5.87669	1.42797	20.398		3371.3	371.761	20.5388	-70.3153	684.923	-9.94594	356196	369795	30204.8	0.00906315	0	0.0313748	0.0329617
2013-11-12 21:30:00	25.2708	36.5308	7.41831	77.1441	5.15381	1.26168	15.0092				34.7536	-72.5319	951.293	-11.1639	280662	368434	31565.9	0.0159412	0	0.0511891	0.0544038
2013-11-12 22:30:00	25.1392	36.7666	7.26661	66.4644	4.44568	1.02431	10.9407				56.1967	-71.9902	1444.29	-12.1528	171645	354710	45290.5	0.0262778	0	0.082005	0.0875603
2013-11-12 23:30:00	24.896	37.0358	7.10339	55.3661	3.71492	0.745554	12.3722				78.6076	-71.5845	2145.53	-12.9632	64677.1	246612	153388	0.0369108	0	0.139514	0.144789
2013-11-13 00:30:00	24.5451	37.3864	6.90508	44.3661	2.98492	0.471778	9.71627				104.879	-71.4049	3455.53	-14.0388	11177.1	62989.3	337011	0.0491349	0	0.209508	0.214071
2013-11-13 01:30:00	24.2351	37.7619	6.72246	35.1712	2.37424	0.270736	11.9437				139.856	-71.3083	5508.33	-15.3111	7681.81	10670.6	389329	0.0653354	0	0.383202	0.378349
2013-11-13 02:30:00	24.0453	37.7817	6.67644	33.0788	2.24085	0.257254	11.8585				167.719	-71.1324	6172.23	-15.2254	8145.31	9268.75	390731	0.078202	0	0.479168	0.471236
2013-11-13 03:30:00	24.1913	36.9218	7.12763	60.7763	4.13017	0.419971	5.19				150.053	-70.7087	2723.36	-12.5049	7215	40035.5	359964	0.0701583	0	0.240826	0.253489
2013-11-13 04:30:00	24.2832	36.3497	7.48771	79.5864	5.41356	0.623759	6.74847	0.494314			88.1802	-70.0337	853.285	-9.48096	32493.7	156766	243234	0.0435246	0.000632846	0.141286	0.14367
2013-11-13 05:30:00	24.3364	36.2566	7.53415	80.9534	5.50551	0.911061	9.80424	0.34616	5850.13	511.116	58.2407	-69.3705	733.438	-9.11608	124037	327985	72015.3	0.0303098	0.000702953	0.0972994	0.0945225
2013-11-13 06:30:00	24.4973	36.21	7.55754	82.6551	5.60797	1.23141	15.0844	0.522292	5485.29	492.678	43.2621	-67.7275	678.65	-8.82659	266542	367474	32525.6	0.0236911	0.00121985	0.0786995	0.0738889
2013-11-13 07:30:00	24.5575	36.1698	7.58263	86.1602	5.83873	1.44331	10.5964	0.641748	3939.29	415.771	33.6897	-66.9585	630.575	-8.69572	363005	369847	30153	0.019129	0.00135423	0.053073	0.0487087
2013-11-13 08:30:00	24.6175	36.1906	7.56678	85.1983	5.76856	1.4334	12.6851	0.848397	3013.72	364.816	28.2931	-66.6427	660.468	-8.72872	358630	369818	30182.2	0.0173314	0.00225008	0.0490905	0.0434858
2013-11-13 09:30:00	24.7509	36.3185	7.48907	80.9195	5.46136	1.29973	10.3653	1.22682	3371.44	383.268	28.8236	-68.0232	820.26	-9.74347	298272	369007	30993.2	0.0205213	0.00447663	0.0548723	0.0460407
2013-11-13 10:30:00	25.3733	36.4787	7.40508	78.5831	5.24585	1.11266	10.6022	1.97146	5540.05	485.597	38.6763	-69.9546	1081.63	-10.8065	211544	363482	36518.1	0.0382837	0.0149906	0.0948763	0.0758936
2013-11-13 11:30:00	26.3183	36.6784	7.30339	77.1322	5.05873	0.878778	12.9132	2.27663	7394.2	557.865	51.6106	-70.5335	1404.99	-11.7319	110607	319787	80212.7	0.0600096	0.0268602	0.148167	0.121098
2013-11-13 12:30:00	27.0565	36.9572	7.2	82.0068	5.30517	0.622305	13.7719	2.10922	9144.04	615.182	65.9467	-70.7152	1862.45	-12.5179	32375.2	155941	244059	0.067996	0.0246119	0.20175	0.162834
2013-11-13 13:30:00	27.9738	37.2423	7.11678	94.6644	6.02305	0.410858	8.55288	2.99664	13140.8	809.937	75.3206	-71.3676	2474.03	-13.2038	6642.62	36469.8	363530	0.0986408	0.0501418	0.228934	0.197921
2013-11-13 14:30:00	28.2233	37.3271	7.09398	101.517	6.42661	0.364425	6.75407	3.96645	15324.3	783.476	95.0439	-72.1322	2721.93	-14.3749	5475.69	23551	376449	0.222947	0.149142	0.364547	0.326772
2013-11-13 15:30:00	28.5305	36.9205	7.28627	96.2542	6.07831	0.495185	5.23254	5.00319	11545.3	675.083	99.6288	-72.0169	1903.54	-12.8656	11786.6	69460.4	330540	0.363134	0.247284	0.396224	0.42166
2013-11-13 16:30:00	28.1577	36.477	7.54449	97.4797	6.21331	0.684597	3.66	4.46869	7886.33	563.389	81.2063	-71.2848	1000.82	-8.73368	46463.5	204041	195959	0.251191	0.165755	0.273187	0.281569
2013-11-13 17:30:00	27.743	36.4142	7.56737	96.1051	6.16992	0.951431	9.14695	4.51926	6534.39	516.361	72.8513	-70.7896	948.43	-6.46255	140531	339684	60316	0.213608	0.144724	0.271079	0.263271
2013-11-13 18:30:00	26.6715	36.3275	7.58831	97.7686	6.3889	1.26452	17.702	3.96994	3823.4	390.958	57.5257	-70.0816	727.621	-7.78624	281843	368214	31785.7	0.13323	0.0868713	0.214247	0.192015
2013-11-13 19:30:00	26.1901	36.2447	7.60847	98.8653	6.51466	1.46218	13.0154	2.81898	2414.49	318.186	20.3066	-66.8929	567.384	-9.84251	371287	369894	30106.1	0.0468909	0.0339844	0.0665745	0.0558283
2013-11-13 20:30:00	26.114	36.2906	7.58924	94.6025	6.23966	1.45515	10.0486	1.77614	2858.14	346.126	19.3732	-67.1549	609.693	-9.4418	368234	369881	30118.8	0.0173676	0.00626126	0.0388805	0.0316877
2013-11-13 21:30:00	26.1445	36.4672	7.53678	88.5746	5.83636	1.35013	12.2897	0.682729	3955.78	405.893	20.3882	-68.777	680.539	-9.52939	321297	369428	30572.3	0.0117537	0.000931732	0.0323534	0.0297718
2013-11-13 22:30:00	26.0791	36.7449	7.43508	77.9907	5.13492	1.16606	12.8373	1.22595	6102.43	505.628	28.5988	-70.9558	872.355	-10.3277	236266	366009	33990.9	0.0207413	0.00407383	0.0585889	0.0496483
2013-11-13 23:30:00	26.0251	37.0419	7.30585	68.1831	4.48661	0.913739	10.7593	1.02976	8422.78	596.399	43.5182	-71.5929	1243.63	-11.5749	124748	330489	69510.8	0.030158	0.00470609	0.0890889	0.0773459
2013-11-14 00:30:00	25.8202	37.2757	7.16432	59.4754	3.92025	0.626929	13.9234	0.972213	10408.4	665.804	63.1362	-71.5419	1728.36	-12.602	33864.8	160016	239984	0.0438144	0.00732566	0.157749	0.139378
2013-11-14 01:30:00	25.4173	37.4123	6.95508	48.6915	3.23025	0.384958	6.82186	2.03162	13763.2	771.007	86.8099	-71.3862	2721.98	-13.835	6385.76	30368	369632	0.0959368	0.0408132	0.250677	0.206373
2013-11-14 02:30:00	24.9003	36.9309	6.72415	40.9517	2.74737	0.255658	5.72237	1.08208	18318.6	896.206	117.073	-71.3578	4689.84	-15.5445	8178.18	8963.34	391037	0.0832889	0.015222	0.30805	0.266938
2013-11-14 03:30:00	24.4325	36.4992	6.60068	38.7805	2.63229	0.261959	7.39915	1.08295	20967.3	960.273	155.964	-71.502	7372.72		8024.98	9923.05	390077	0.110611	0.0203127	0.448182	0.388222
2013-11-14 04:30:00	24.8108	36.3403	7.04127	62.0466	4.1828	0.464663	8.7539	0.528395	13368.9	753.557	155.787	-71.2068	3978.1	-14.1807	10113	58161	341839	0.0899344	0.00511964	0.349897	0.325017
2013-11-14 05:30:00	24.8757	36.018	7.4211	79.1517	5.33898	0.70101	7.62085	0.501365	8340.23	602.534	111.315	-70.658	1143.25	-10.2917	51403.3	215744	184256	0.0629497	0.00275438	0.193317	0.182742
2013-11-14 06:30:00	24.8562	36.0276	7.50415	80.222	5.41347	1.00176	12.03	0.74638	6841.04	544.168	76.3478	-70.1121	784.591	-9.10689	162213	349263	50737.4	0.0473501	0.00469579	0.149356	0.134254
2013-11-14 07:30:00	25.0725	36.1226	7.55661	84.7042	5.69136	1.33408	20.9027	0.603382	4388.42	431.567	54.2089	-68.9444	687.159	-8.53323	313645	369097	30902.8	0.031371	0.00201212	0.109935	0.10156
2013-11-14 08:30:00	25.2036	36.1149	7.60771	90.8415	6.09195	1.53896	18.2942	0.823111	2595.77	332.514	39.181	-68.1192	608.343	-8.01595	404428	370016	29983.8	0.0239177	0.00237708	0.077587	0.0698323
2013-11-14 09:30:00	25.2183	36.1042	7.58093	89.0771	5.97263	1.52177	15.6168	1.02279	2117.51	301.828	26.6939	-67.9119	611.596	-8.20857	397076	369996	30004.2	0.0176482	0.00294091	0.0500798	0.0433992
2013-11-14 10:30:00	25.3451	36.0675	7.49754	85.5542	5.72356	1.39327	20.3524	1.21461	2953.64	353.168	24.5569	-68.7957	750.99	-8.95149	340696	369650	30349.6	0.0174023	0.00373861	0.0543866	0.0464205
2013-11-14 11:30:00	25.7411	36.0104	7.37076	82.9127	5.51449	1.18169	13.2968	1.37505	4612.83	440.444	30.3473	-69.3475	1038.19	-10.3108	243528	366439	33561.2	0.0239744	0.00642361	0.0656457	0.0550729
2013-11-14 12:30:00	26.3595	36.0347	7.23492	81.9856	5.39458	0.919947	12.3793	2.60187	6710.11	529.253	41.124	-70.1478	1487.77	-11.7782	127175	332785	67214.6	0.0541307	0.0279794	0.120687	0.0985129
2013-11-14 13:30:00	26.4733	36.0404	7.11169	82.1	5.39093	0.646747	11.5849	2.11794	8167.18	584.033	48.485	-70.5302	1927.15	-12.7131	37979.1	174774	225226	0.0518365	0.0213496	0.139999	0.114717
2013-11-14 14:30:00	26.4632	36.0925	6.96907	79.6407	5.22856	0.401485	8.94966	0.810904	10361.8	655.821	65.4536	-71.0976	2929.04	-15.1496	6749.04	34867.7	365132	0.0429711	0.00485293	0.152926	0.13789
2013-11-14 15:30:00	26.7552	36.1639	6.89212	83.8076	5.47229	0.304919	5.04864	1.81015	15027.2	788.82	95.591	-71.2576	3980.31	-16.2138	6375.52	13830.4	386170	0.0943662	0.0335785	0.252901	0.208678
2013-11-14 16:30:00	27.1919	36.1066	7.11271	90.8932	5.89686	0.440722	6.31119	2.47544	14784.8	778.849	108.648	-71.8586	2826.33	-16.4513	8147.99	47141.4	352859	0.142283	0.0697082	0.320147	0.264136
2013-11-14 17:30:00	27.2581	36.08	7.46619	94.0076	6.09271	0.646317	8.17475		8842.27	594.324	45.7835	-68.421	821.71	-11.7054	37345.7	174018	225982
2013-11-14 18:30:00	26.7698	36.0817	7.53	90.9381	5.94059	0.938502	11.5337		5554.64	480.304	42.8483	-69.0074	799.817	-10.1971	135464	334968	65032.2
2013-11-14 19:30:00	25.5775	34.0027	7.54661	91.7017	6.18517	1.27665	13.4556		4817.02	450.559	38.9267	-68.8849	701.828	-9.56007	287405	368411	31589.2
2013-11-14 20:30:00	25.4067	34.071	7.55492	93.0034	6.28754	1.42955	5.50847		3270.52	370.742	31.0346	-68.4487	592.686	-9.22307	356999	369819	30181.1
2013-11-14 21:30:00	25.2808		7.53525	89.4136	6.08093	1.40238	13.1832	1.17886	3477.85	385.963	26.3937	-68.0089	626.739	-9.3804	344864	369712	30287.6	0.0183549	0.00345457	0.0495386	0.0419469
2013-11-14 22:30:00	24.0618		7.36203	78.4144	5.67551	1.26512	12.5942	1.20851	5918.43	506.914	33.5987	-68.4051	883.437	-10.7873	282309	368586	31413.5	0.023229	0.00451938	0.0671062	0.0568664
2013-11-14 23:30:00	22.2081		7.03398	71.722	5.72873	1.05884	13.4827	1.95402	9160.75	655.463	55.3167	-69.238	1219.13	-12.0881	187010	359097	40903.2	0.052435	0.0205296	0.15269	0.121298
2013-11-15 00:30:00	22.5087		6.80169	58.7254	4.65229	0.797858	12.4719	0.936463	11288	724.937	77.515	-70.0869	1742.7	-13.1272	81635.4	278894	121106	0.0506844	0.00865482	0.177055	0.156498
2013-11-15 01:30:00	23.6098		6.71237	47.8856	3.57788	0.496861	14.748	0.737661	14932.1	819.278	103.133	-70.7978	3371.26	-15.4056	14013.9	76947.4	323053	0.0625027	0.00486559	0.284408	0.255073
2013-11-15 02:30:00	23.5687		6.54737	40.6492	2.98525	0.272417	17.4081	0.942567	20173.2	956.193	141.068	-71.3858	5825.39	-17.0119	7648.92	10950.5	389049	0.0926716	0.011796	0.551079	0.484897
2013-11-15 03:30:00	23.2592		6.46585	39.3331	2.88517	0.196719	11.4403	0.800441	25148.3	1073.1	194.606	-72.1545	8622.56		10557.7	5191.25	394809	0.120441	0.0107036	0.725678	0.644176
2013-11-15 04:30:00	23.3098		6.56331	44.0576	3.19373	0.28128	6.47203	0.838806	27884.3	1126.5	235.326	-72.4331	7840.8	-16.5745	7541.42	12607.3	387393	0.148519	0.0160809	0.619285	0.546815
2013-11-15 05:30:00	24.4199		7.2878	72.5669	4.99771	0.5012	7.31407	0.721094	15626.2	811.397	171.121	-71.8153	1323.1	-10.9574	13431.1	75981	324019	0.104519	0.00751682	0.370381	0.332971
2013-11-15 06:30:00	24.2797	35.0763	7.51958	81.3898	5.57958	0.788136	8.30136	0.730685	6994.85	552.414	102.767	-70.6455	667.666	-8.51006	79027.9	270804	129196	0.0619191	0.00448026	0.198652	0.178357
2013-11-15 07:30:00	24.3259	35.2691	7.54169	82.9737	5.67585	1.1338	16.4232	1.03325	5006.1	469.681	67.1579	-69.7224	645.19	-8.62086	221537	363284	36716.2	0.0445486	0.00596398	0.153083	0.131679
2013-11-15 08:30:00	24.7119	35.4673	7.57585	87.5034	5.94186	1.45693	28.8832	1.26606	3352.66	380.665	46.2361	-68.9958	618.321	-8.68985	368609	369821	30179.2	0.0334367	0.00643653	0.119999	0.101213
2013-11-15 09:30:00	24.9913	35.4897	7.58924	90.628	6.1228	1.61181	15.6256	1.64709	2452.01	325.389	32.8025	-67.3907	589.943	-8.54229	435257	370076	29923.8	0.0274252	0.00822608	0.0726768	0.0589348
2013-11-15 10:30:00	25.3046	35.4292	7.55432	90.7407	6.10119	1.54915	19.2137	2.47631	2467.33	324.138	25.6404	-66.5644	648.702	-8.84101	408762	370026	29973.8	0.0292118	0.0139648	0.0715548	0.0564985
2013-11-15 11:30:00	26.1025	35.1689	7.47034	92.9297	6.17186	1.40734	28.0747	2.33854	3167.63	364.628	26.0656	-67.4697	817.304	-9.65339	346913	369693	30306.5	0.0283891	0.0126181	0.0783843	0.063179
2013-11-15 12:30:00	27.3401	34.6213	7.31907	96.1712	6.27525	1.16127	16.2336	2.42486	4069.38	407.047	32.75	-70.0771	1253.01	-11.1996	234088	365398	34601.7	0.0388692	0.0179717	0.0895832	0.0724581
2013-11-15 13:30:00	28.696	34.3447	7.21246	100.003	6.3928	0.862622	12.0158	2.40917	5092.79	448.186	43.4836	-71.4018	1684.6	-12.3485	105092	310242	89757.6	0.0544368	0.0253467	0.117991	0.0975399
2013-11-15 14:30:00	30.0595	34.1304	7.09415	102.008	6.38525	0.55801	14.6753	2.60274	6476.45	497.466	56.9626	-71.9745	2257.36	-13.4488	21656.8	112307	287693	0.0809583	0.0407882	0.181549	0.155228
2013-11-15 15:30:00	30.3208	34.0217	6.96907	100.008	6.23754	0.3231	6.55983	2.64198	8373.41	563.025	70.7322	-72.2492	3352.69	-14.9419	6330	17456.5	382544	0.105868	0.05461	0.210972	0.182145
2013-11-15 16:30:00	30.3793	34.0973	6.90856	98.5331	6.13831	0.272276	4.4239	4.5864	11947.1	672.961	84.1895	-72.1548	3860.9	-15.4932	7551	10508.8	389491	0.269829	0.185474	0.318902	0.324099
2013-11-15 17:30:00	29.5414	34.6053	7.13797	94.5415	5.95153	0.437276	5.5939	4.40504	11058	652.373	87.7216	-72.1144	2333.28	-13.3908	8069.63	46208.2	353792	0.262629	0.176879	0.31643	0.315749
2013-11-15 18:30:00	27.3838	35.3495	7.44788	92.7788	6.02636	0.659514	7.26661	3.72144	7792.27	563.454	75.0261	-71.3751	962.466	-9.2907	40646.3	184262	215738	0.153893	0.0998461	0.252888	0.217319
2013-11-15 19:30:00	26.4381	35.5085	7.51754	90.128	5.94161	0.9477	11.2341	1.55641	5471.71	476.225	55.7327	-70.7974	801.161	-8.80308	139099	338198	61802.2	0.0517099	0.0169719	0.130944	0.109707
2013-11-15 20:30:00	26.094	35.3494	7.55263	94.1703	6.24669	1.25562	13.6532		3736.63	396.118	36.9305	-70.6858	716.731	-8.67785	277816	368218	31782
2013-11-15 21:31:00	25.9794	35.3559	7.53656	94.2019	6.26271	1.37055	6.39847				29.8396	-72.4496	680.504	-8.63807	330648	369589	30410.7
2013-11-15 22:31:00	25.9066	35.3232	7.51071	89.3347	5.94531	1.29455	10.4719	0.551938			19.9685	-74.4918	661.362	-11.7659	295941	368997	31002.7	0.0110394	0.000663715	0.0304715	0.0284868
2013-11-15 23:31:00	25.7792	35.32	7.44808	81.4515	5.43397	1.15696	7.8321	1.10824			25.8855	-74.5536	702.281	-10.0717	232022	365832	34168.5	0.0177052	0.00298665	0.0441762	0.0376414
2013-11-16 00:31:00	25.7014	35.1583	7.33146	72.0195	4.8169	0.928355	10.4972	1.72993			37.326	-74.4723	846.418	-10.2174	130456	335900	64100.3	0.0328886	0.0109497	0.0871541	0.0723234
2013-11-16 01:31:00	25.6654	34.8753	7.12278	60.2436	4.03507	0.654522	11.4421	0.707143			54.5403	-74.2661	1091.72	-12.4181	40180.3	180896	219104	0.0344608	0.00305295	0.113131	0.101226
2013-11-16 02:31:00	25.3554	34.5206	6.84763	44.6293	3.00905	0.373547	12.9132	0.533627							6850.36	29371.7	370628
2013-11-16 03:31:00	25.0034	34.366	6.64478	32.5575	2.21419	0.200873	20.1787	0.653955							10332.8	5529.15	394471
2013-11-16 04:31:00	24.8028	34.4318	6.58536	28.4239	1.93539	0.174707	19.5023	0.650467							11204.9	4301.62	395698
2013-11-16 05:31:00	24.7915	34.7191	6.80885	44.4441	3.02197	0.342267	8.72203	0.626053							6720.09	22536.6	377463
2013-11-16 06:31:00	24.8396	35.2843	7.31064	73.7236	4.99634	0.603524	8.10654	0.560657							29359.5	143093	256907
2013-11-16 07:31:00	24.9809	35.4108	7.4602	79.9354	5.40256	0.924291	12.6847	0.619949							129660	330832	69168.3
2013-11-16 08:31:00	25.2812	35.4013	7.51997	85.7076	5.76351	1.29032	23.4637	1.75609							293470	368344	31655.6
2013-11-16 09:31:00	25.3621	35.3876	7.58203	91.4015	6.1358	1.58582	31.4598	0.775154			27.2423	-66.9275	640.856	-9.46489	424226	370052	29947.9	0.0162776	0.00141943	0.0588283	0.0527731
2013-11-16 10:31:00	25.618	35.4118	7.5712	93.2717	6.2359	1.65873	12.672	0.857989	2461.89	322.676	33.9868	-69.2651	632.917	-9.29111	454895	370097	29902.8	0.0216151	0.00265202	0.0562842	0.0500844
2013-11-16 11:31:00	26.0292	35.3906	7.52095	93.7325	6.22424	1.57441	24.6919		1589.42	259.555	24.7133	-69.1241	592.632	-9.20095	419466	370048	29951.8	0.0183784	0.00439017	0.0556885	0.0478828
2013-11-16 12:31:00	26.6372	35.3353	7.40463	94.5166	6.21444	1.40661	39.8743	1.29919	2231.52	301.64	23.9812	-69.876	1021.86	-10.9884	346503	369668	30331.8	0.0186928	0.00480176	0.065464	0.0563456
2013-11-16 13:31:00	27.4455	35.1982	7.30842	95.0439	6.17151	1.11469	25.9216	2.4301	3213.26	361.625	32.8745	-71.595	1168.61	-12.0099	212791	362077	37922.7	0.0411482	0.0201407	0.102742	0.0856732
2013-11-16 14:31:00	28.5127	35.0803	7.14732	94.1692	6.01629	0.763718	18.4392	3.96035	3769.2	386.504	42.103	-72.3146	1628.03	-12.5704	71172.1	255748	144252	0.104995	0.0678315	0.16516	0.156113
2013-11-16 15:31:00	28.7822	35.1061	6.94168	83.9124	5.33361	0.469087	15.3558	3.66563	4323.59	412.665	43.067	-72.3042	2019.53	-13.155	10937.4	61689.1	338311	0.0884785	0.0568379	0.17232	0.151996
2013-11-16 16:31:00	28.5801	35.155	6.72981	67.4776	4.30176	0.269599	6.10692	3.54531	6577.74	503.069	49.3072	-72.2305	3252.94	-15.0616	7706.33	10476.6	389523	0.0919013	0.05816	0.178108	0.150007
2013-11-16 17:31:00	28.4829	35.1927	6.69086	64.459	4.11258	0.287809	6.26142	3.20438	11731.8	680.5	91.8777	-72.2218	6827.94	-16.8074	7139.11	12605.6	387394	0.163997	0.0985218	0.324399	0.276689
2013-11-16 18:31:00	27.7158	35.2552	7.02731	75.8803	4.90783	0.475556	5.69668	2.69865	11182.9	668.843	100.109	-71.6185	3999.12	-15.3968	10640.9	61990.8	338009	0.144165	0.0757892	0.291602	0.240536
2013-11-16 19:31:00	26.5928	35.4176	7.4271	87.9061	5.78181	0.707185	7.53176	1.09952	6346.26	508.362	63.8458	-70.9979	1092.67	-11.1572	53064.1	220311	179689	0.0481876	0.00972139	0.129186	0.111964
2013-11-16 20:31:00	25.9865	35.4371	7.50007	88.8732	5.9042	1.01615	12.9731	1.08469	4649.05	442.19	40.644	-72.0252	727.282	-9.63234	168633	351055	48944.6	0.0286114	0.00493072	0.0844076	0.0732484
2013-11-16 21:31:00	25.7419	35.4229	7.52753	93.3183	6.22671	1.32357	10.882	2.09004	3095.37	360.143	29.8874	-70.2327	637.619	-9.4076	309169	369194	30806.3	0.0305294	0.0126597	0.069328	0.0556662
2013-11-16 22:31:00	25.4846	35.4227	7.50642	90.0725	6.03419	1.33433	7.02929	2.34116	2770.28	345.764	25.75	-70.6286	611.851	-9.63719	314202	369363	30636.8	0.0277754	0.012445	0.0586002	0.0450866
2013-11-16 23:31:00	25.2778	35.4625	7.46671	84.1363	5.65563	1.2224	8.46254	1.85113	3536.81	390.566	25.7106	-70.3342	675.152	-9.91315	262478	367831	32169	0.0232352	0.00827094	0.0551604	0.0437853
2013-11-17 00:31:00	24.9756	35.5136	7.38553	76.4498	5.16417	1.01842	11.084	1.77353	4941.33	464.804	29.1678	-69.6217	793.656	-10.2943	168929	354341	45659	0.0255199	0.00853688	0.0692058	0.0555362
2013-11-17 01:31:00	24.6071	35.5346	7.17041	64.1273	4.35629	0.75107	7.71956	1.89211	6654.49	540.286	42.8733	-71.1267	1188.01	-11.5688	66171.7	250816	149184	0.039689	0.014184	0.104065	0.0827097
2013-11-17 02:31:00	24.1325	35.5621	6.89076	50.5254	3.46063	0.476514	8.53651	1.11172	10203.9	674.281	70.9591	-72.0113	2412	-13.8898	11699.5	65592.4	334408	0.0493321	0.0088892	0.173935	0.148634
2013-11-17 03:31:00	23.6285	35.6258	6.67934	39.3807	2.71998	0.252431	10.7397	0.680113	14392.1	807.754	107.171	-72.1259	4490.7	-15.8135	8387.88	9288.9	390711	0.0629887	0.00485442	0.345657	0.310821
2013-11-17 04:31:00	23.3363	35.6748	6.58054	33.2863	2.30781	0.17043	14.0766	0.72371	18582.7	924.83	140.285	-71.9137	6303.25		11370.5	4090.43	395910	0.0840116	0.00777747	0.566525	0.506574
2013-11-17 05:31:00	23.2793	35.6672	6.61798	35.0869	2.43747	0.245726	9.41047	0.735917	20074.3	963.323	160.199	-71.5404	6669.5		8686.65	9191.54	390808	0.096781	0.00990548	0.509649	0.455495
2013-11-17 06:31:00	23.9183	35.4264	7.23125	71.4139	4.91434	0.483662	8.52393	0.96175	15520.7	830.891	134.664	-71.113	3136.21	-14.3472	11989.2	67932.4	332068	0.0885198	0.0118828	0.329178	0.285957
2013-11-17 07:31:00	24.198	35.3896	7.46588	81.2076	5.56378	0.768297	10.5121	1.05766	7766.44	581.666	86.5977	-70.6016	932.562	-10.5353	72329.1	259660	140340	0.059768	0.0101732	0.199224	0.170654
2013-11-17 08:31:00	24.3113	35.4444	7.4779	83.3185	5.69386	1.11447	14.1081	0.947798	4882.36	463.187	58.2405	-70.3884	746.058	-9.54351	212737	361790	38209.9	0.037883	0.00538285	0.123567	0.107829
2013-11-17 09:31:00	24.3919	35.4266	7.54473	90.1532	6.15386	1.45541	32.1164	1.12306	3046.24	363.527	42.2535	-69.8619	681.398	-9.22892	367798	369792	30207.5	0.028886	0.00499647	0.110002	0.0943209
2013-11-17 10:31:00	23.8149	35.3491	7.58771	95.9868	6.62012	1.68931	27.1015	1.11783	1974.4	295.083	31.1526	-69.2855	582.569	-8.69885	467673	370105	29895	0.020668	0.00367869	0.0732577	0.0624687
2013-11-17 11:31:00	23.9419	35.3747	7.57197	97.2158	6.68949	1.69846	13.8274	1.15968	1436.84	251.23	23.6034	-70.064	547.548	-8.58573	471493	370109	29891.4	0.0156389	0.00296483	0.0432038	0.0360738
2013-11-17 12:31:00	24.6952	35.5753	7.48183	96.2824	6.53253	1.58391	30.962	1.04284	1744.44	272.594	22.555	-71.0263	659.32	-9.29559	423440	370052	29947.7	0.0147317	0.0026853	0.0532204	0.0463197
2013-11-17 13:31:00	25.1067	35.6824	7.42532	97.9076	6.59319	1.35732	48.825	0.993139	2545.02	331.171	26.1579	-73.1175	811.854	-10.3438	324212	369320	30679.7	0.0169405	0.00255694	0.0760298	0.0667179
2013-11-17 14:31:00	25.4627	35.8086	7.30919	97.0988	6.49263	1.01626	21.1906	1.35587	3139.49	366.171	35.6221	-73.3549	1035.49	-11.4996	168787	350612	49388.2	0.0278283	0.00714794	0.0926088	0.0785806
2013-11-17 15:31:00	25.7475	35.9926	7.10708	88.2575	5.86837	0.66912	16.7696	1.25647	4114.39	417.264	48.2332	-74.3041	1599.1	-12.9979	44212.1	191296	208704	0.0364293	0.00794467	0.13364	0.11486
2013-11-17 16:31:00	25.6753	36.2358	6.86185	74.1924	4.93249	0.398929	11.7887	1.08905	6598.58	526.564	64.6745	-72.5185	2795.04	-14.5131	6840.72	34619.4	365381	0.0458925	0.00792344	0.18175	0.158774
2013-11-17 17:31:00	25.3214	36.4626	6.68166	61.07	4.07844	0.261099	6.3318	0.959134	10918.3	683.786	89.159	-72.313	4413.73	-15.8335	7954.96	9386.85	390613	0.0611784	0.00939207	0.231124	0.20301
2013-11-17 18:31:00	25.119	36.3966	6.66093	57.7756	3.873	0.3561	5.90837	1.22856	13278.9	759.452	110.279	-72.1061	5027.48	-16.306	6087.83	23540.5	376460	0.0830675	0.0173596	0.273529	0.232307
2013-11-17 19:31:00	24.5828	35.8272	7.035	76.0441	5.16492	0.539532	5.53858	1.01058	10365.1	671.159	101.4	-71.7455	2736.35	-14.1651	17495.6	96427.5	303572	0.0692416	0.0105683	0.206861	0.177918
2013-11-17 20:31:00	24.2194	35.5985	7.29417	81.8331	5.59803	0.768136	7.1262	0.806544	6856.09	551.015	67.009	-71.7775	1104.04	-11.4613	71175.9	263041	136959	0.0415915	0.0044233	0.123099	0.108883
2013-11-17 21:31:00	24.0886	35.5254	7.3859	80.8175	5.54281	1.03681	10.252	0.787362	5784.43	507.811	47.7893	-70.1036	840.641	-10.3479	177249	356137	43862.7	0.0290277	0.00329923	0.0891021	0.0795282
2013-11-17 22:31:00	24.337	35.4987	7.44885	88.2293	6.02703	1.27961	10.9123	2.66378	4184.64	427.239	37.0585	-69.3238	729.709	-9.76244	289013	368767	31232.9	0.0482347	0.0255038	0.103602	0.083251
2013-11-17 23:31:00	24.1882	35.5008	7.42515	84.7739	5.80298	1.26178	6.15441	0.694064	3394.69	387.679	31.1543	-70.165	690.154	-9.65338	280813	368623	31376.8	0.0181304	0.00199246	0.0441804	0.0402749
2013-11-18 00:31:00	23.8743	35.5781	7.33476	76.1893	5.24227	1.13004	8.21264	0.837934	5037.93	471.59	34.1233	-68.8335	842.722	-10.3943	219522	364689	35310.5	0.0204312	0.00216177	0.0581907	0.0511145
2013-11-18 01:31:00	23.5293	35.6699	7.2172	68.5403	4.74393	0.922676	7.07644	1.1248	7555.63	583.843	45.3607	-68.5173	1143.31	-11.4405	127811	335745	64255	0.0312014	0.00634382	0.0879737	0.0740098
2013-11-18 02:31:00	23.1824	35.89	7.01432	59.6295	4.14339	0.676283	11.1373	0.432482	10517.9	691.769	65.5615	-69.8038	1801.61	-12.8346	45232.3	197343	202657	0.034432	0.0012283	0.138623	0.129803
2013-11-18 03:31:00	22.7624	36.1742	6.76322	46.9247	3.27869	0.394783	7.54766	0.397605	14935.5	828.897	103.238	-71.2759	3393.93	-14.6692	7301.53	35133.2	364867	0.0534679	0.001694	0.221978	0.209098
2013-11-18 04:31:00	22.4611	36.3761	6.58217	36.5783	2.56781	0.213571	11.3503	0.463	20036	968.21	151.148	-71.9144	5687.58	-15.8902	9863.77	6226.19	393774	0.0809672	0.00400511	0.509924	0.466774
2013-11-18 05:31:00	22.2877	36.3986	6.51688	32.7705	2.30408	0.174851	8.99061	0.69232	23193.8	1045.09	185.488	-71.823	6919.69		11251.4	4261.26	395739	0.107137	0.00944846	0.655391	0.586107
2013-11-18 06:31:00	22.6593	35.9774	6.76634	48.0305	3.36241	0.329977	4.97675	0.829215	21954.7	1005.83	188.764	-71.3973	5620.42	-14.8072	6876.24	20512	379488	0.116048	0.0139395	0.432534	0.380747
2013-11-18 07:31:00	23.3964	35.3358	7.32627	76.9882	5.35114	0.593889	7.51447	0.637388	11988.6	1080.07	120.41	-70.9199	1297.33	-11.5205	27586	136270	263730	0.0708175	0.00589313	0.244767	0.220524
2013-11-18 08:31:00						0.915656	12.0013	0.251991	11996.2	1352.94	70.0782	-70.9497	760.048	-9.67003	126292	327606	72393.8	0.0348203	0.000412783	0.125877	0.123247
2013-11-18 09:31:00						1.27624	22.1363	0.205778	6670.85	945.744	46.4101	-70.0896	726.167	-9.64727	287114	368226	31774.4	0.0222595	0.000149299	0.0881671	0.0867078
2013-11-18 10:31:00	23.8528	35.303	7.55804	91.5647	6.31431	1.58658	38.3218	0.205778	1940.13	359.263	30.4267	-68.5332	618.827	-9.06353	424435	370043	29956.7	0.0143586	9.63062e-05	0.0665067	0.0645924
2013-11-18 11:31:00	24.0815	35.2905	7.55441	94.6202	6.4968	1.71379	14.5497	0.205778	1678.86	335.548	20.5165	-66.5211	573.211	-8.83751	477900	370113	29887.3	0.00941284	6.3134e-05	0.027548	0.0279927
2013-11-18 12:31:00	24.9111	35.3652	7.5039	96.9059	6.55803	1.64963	19.0395	0.205778	1970.61	357.353	18.0707	-67.2934	626.222	-9.14031	451084	370092	29907.5	0.00834972	5.60035e-05	0.026981	0.0271572
2013-11-18 13:31:00	26.5837	35.543	7.42537	102.578	6.74375	1.50528	36.6057	0.205778	3143.24	442.663	25.7255	-70.6796	886.299	-10.2767	389842	369957	30042.6	0.0128512	8.61957e-05	0.0523284	0.051593
2013-11-18 14:31:00	27.0544	35.6231	7.38646	102.059	6.65408	1.24167	44.3247	0.205778	2813.46	419.566	29.6972	-71.9811	958.115	-10.4015	271256	367578	32421.6	0.0151667	0.000101726	0.0704697	0.0687245
2013-11-18 15:31:00	26.8638	35.767	7.22344	92.5044	6.04585	0.886421	20.2593	0.205778	3247.22	452.313	33.1497	-72.1053	1243.1	-11.3925	114783	317218	82782.4	0.0169648	0.000113786	0.0664161	0.0657452
2013-11-18 16:31:00	26.4717	36.0169	6.99261	78.5973	5.16376	0.562649	18.0294	0.205778	4953.52	561.409	41.0857	-71.775	2083.15	-13.252	22461.2	115609	284391	0.021062	0.000141268	0.0984338	0.0958817
2013-11-18 17:31:00	25.4793	35.4448	6.77769	68.2154	4.59053	0.369934	17.7754	2.07609	7019.07	704.147	50.248	-72.7827	3416.6	-14.994	6312.11	27170.1	372830	0.138863	0.0591676	0.196345	0.243494
2013-11-18 18:31:00	12.1184		6.82529	85.482	8.60693	0.545846	46.1581	1.79707	8197.59	911.16	80.5394	-73.4408	2721.98	-16.0432	18069.1	99598.2	300402	0.0537345	0.0170504	0.505907	0.403082
2013-11-18 19:31:00	12.2786		6.72081	86.7068	8.80778	0.464411	20.9886	1.79184	5396.88	714.582	76.3933	-73.2502	1523.66	-16.4257	8785.01	53783.5	346217	0.0508223	0.0154746	0.378493	0.291776
2013-11-18 20:31:00	13.3485		6.67703	84.2669	8.33168	0.638325	7.73966	1.59129	3901.28	599.037	63.0659	-73.3276	1500.97	-18.6102	35355.6	168006	231994	0.0396675	0.0100607	0.192407	0.141076
2013-11-18 21:31:00	14.2305		6.67042	84.0273	8.02888	0.871309	5.86136	1.62966	4498.29	612.024	51.4163	-74.3553	1385.07	-18.3667	107708	316954	83046.4	0.0331493	0.00868045	0.134143	0.0947531
2013-11-18 22:31:00	22.0472	30.6923	7.07917	85.8393	6.28003	1.15099	11.9376	1.76132	3208.52	467.345	34.0589	-71.9741	710.616	-12.1592	229309	365261	34738.8	0.0269491	0.00789451	0.0858407	0.0661672
2013-11-18 23:31:00	22.9642	33.4165	7.1439	85.4836	6.05059	1.26509	5.5121	1.81799	3330.81	479.451	29.4055	-70.032	668.017	-10.2024	282370	368702	31298.5	0.0241629	0.00749419	0.0597261	0.0445784
2013-11-19 00:31:00	21.7254	31.1983	7.24	79.6931	5.8399	1.18461	9.14054	1.77963	4744.07	583.611	31.2055	-69.5672	710.13	-10.4658	244875	366971	33029.2	0.0245035	0.00718578	0.0731887	0.0552532
2013-11-19 01:31:00	20.0595		7.20324	74.5803	5.73341	1.0315	9.70085	1.76393	5986.46	673.167	46.7434	-73.319	795.819	-11.2659	174482	357089	42910.8	0.0358452	0.0102617	0.122163	0.0916918
2013-11-19 02:31:00	19.5644		7.16546	70.6063	5.50986	0.822634	11.5362	1.5817	6904.07	722.269	70.0758	-71.1979	913.366	-12.0679	89391.2	295945	104055	0.0509149	0.012566	0.198875	0.154
2013-11-19 03:31:00	20.5202		7.13966	65.3134	4.95344	0.569753	12.8614	1.62355	7620.89	746.683	70.9262	-63.8169	995.065	-12.3524	23037.1	119061	280939	0.0534291	0.0137508	0.229309	0.181783
2013-11-19 04:31:00	21.1188		7.03322	58.3271	4.38917	0.307071	12.3202	1.66889	11807.8	925.731	74.5889	-65.8918	1360.79	-12.5251	7049.29	16347.5	383652	0.0579693	0.0153913	0.287377	0.232858
2013-11-19 05:31:00	20.0108		6.64369	46.5924	3.64431	0.173182	12.3861	1.60524	22572.9	1300.33	122.515	-70.5912	3079.72	-14.7797	11274.4	4212.57	395787	0.0920421	0.0231002	0.583773	0.481009
2013-11-19 06:31:00	20.5197		6.68151	49.6629	3.78651	0.288403	9.0938	2.01418	19541.6	1188.16	162.415	-71.7229	3758.83	-15.9573	7417.35	13772.8	386227	0.145345	0.051857	0.636166	0.500063
2013-11-19 07:31:00	22.0977		7.05858	70.5359	5.0852	0.509301	9.56163	1.88252	8576.69	775.265	113.549	-72.6766	1139.75	-11.6376	14380.3	80590.5	319409	0.0992514	0.0325653	0.348954	0.272101
2013-11-19 08:31:00	22.4879	33.6987	7.18747	79.5842	5.6729	0.784053	9.88047	2.45102	5938.11	642.422	72.169	-72.1351	773.139	-10.1376	77116.1	270328	129672	0.0780981	0.0356512	0.225154	0.170535
2013-11-19 09:31:00	23.4179	34.0184	7.27166	84.4398	5.90769	1.11881	14.6195	2.93146	4017.68	518.374	49.6078	-68.803	749.485	-9.96085	214693	362232	37767.5	0.0697903	0.0394833	0.165085	0.130737
2013-11-19 10:31:00	23.5713	34.293	7.44461	89.3858	6.22725	1.45484	35.0881	3.63686	2409.47	402.566	37.6697	-67.9414	679.723	-9.28065	367548	369791	30209.3	0.0666779	0.0422253	0.156228	0.128282
2013-11-19 11:31:00	23.7058	34.386	7.54034	93.8422	6.52086	1.69907	31.7728	4.53147	1707.59	338.22	30.2597	-67.5162	600.378	-8.52654	471772	370107	29893.3	0.085683	0.0576059	0.134188	0.128513
2013-11-19 12:31:00	24.0666	34.3742	7.51675	95.2064	6.57432	1.75055	12.5971	2.85996	1538.01	339.087	25.1175	-67.0659	587.536	-8.12854	493345	370119	29880.8	0.0342118	0.0189229	0.0683549	0.0545227

## Sheet: Newcastle Mangrove
Date/Time	Temperature (°C)	Salinity	pH (NBS)	DO(%)	DO mg/L	Depth (m)	Current velocity (cm/s)	Windspeed (m/s)	Rn (dpm/m3)	Rn unc (dpm/m3)	CH4 (nM)	d13C-CH4	pCO2 (uatm)	d13C-CO2	Water Volume (m3)	Water area (m2)	Exposed area (m2)	Flux CH4 (RC01) (mmol/m2/d)	Flux CH4 (W92) (mmol/m2/d)	Flux CH4 (BO04) (mmol/m2/d)	Flux (HO14) (mmol/m2/d)
2014-11-13 11:00:00
2014-11-13 12:00:00	22.615	32.25	7.62667	97.78	7.008	2.91896	13.3335	3.43333	1036.42	211.482	6.31124	-58.5971	615.645	-10.8992	821935	1.26583e+06	14.3205	0.00642988	0.0038838	0.0135583	0.00977311
2014-11-13 13:00:00	22.4117	33.8583	7.69833	100.1	7.14	3.06798	13.3047	3.35	1089.66	215.235	5.50985	-58.7191	546.465	-10.1504	1.03221e+06	1.26584e+06	0.864292	0.00508562	0.00302441	0.010849	0.00778528
2014-11-13 14:00:00	22.315	34.395	7.725			3.16262	10.5028	3.5	1048.79	210.761	5.48856	-58.7758	522.049	-10.2001	1.17445e+06	1.26584e+06	0.127751	0.00529518	0.00325364	0.010777	0.00767432
2014-11-13 15:00:00	22.7367	34.43	7.72	103.5	7.26	3.14881	7.314	2.75	943.303	197.694	4.60783	-57.7227	492.931	-10.2558	1.1536e+06	1.26584e+06	0.194376	0.00306163	0.00151811	0.00643287	0.00446026
2014-11-13 16:00:00	22.7717	34.3883	7.72333			2.97754	13.3425	1.76667	1260.16	229.363	4.79652	-57.8971	521.842	-10.4488	903390	1.26583e+06	5.52995	0.00234081	0.000695857	0.00594795	0.00444891
2014-11-13 17:00:00	23.57	33.1467	7.64333	101.58	7.126	2.76532	16.1607	1.78333	1379.83	239.592	5.05217	-58.67	590.236	-10.8221	619395	1.26561e+06	230.088	0.0026126	0.000763988	0.00677023	0.00516109
2014-11-13 18:00:00	23.7267	31.8517	7.51833	93.4167	6.58333	2.57232	18.7273	1.7	1641.31	258.921	6.83099	-60.6697	763.801	-11.7844	379569	1.257e+06	8841.02	0.00416998	0.00123143	0.0112275	0.00870749
2014-11-13 19:00:00	23.7017	31.4783	7.39167	84.9	5.99833	2.37324	16.8627	1.85	1831.69	274.722	9.06342	-62.2261	1046.41	-12.9292	144287	1.07326e+06	192585	0.00636123	0.00200265	0.0168216	0.012851
2014-11-13 20:00:00	23.925	31.5133	7.25	79.5333	5.59833	2.20979	15.3168	2.45	2260.76	305.414	11.1754	-62.5225	1423.92	-13.9715	27234.8	378202	887638	0.0101849	0.00442886	0.0249248	0.0184918
2014-11-13 21:00:00	23.9	31.91	7.095	72.3833	5.085	2.12985	8.276	2.08333	2652.82	330.058	13.7053	-61.8957	1929.86	-15.145	6504.68	113286	1.15255e+06	0.011478	0.00418702	0.0259067	0.0192213
2014-11-13 22:00:00	23.6683	31.6917	7.1	71.6833	5.06667	2.13731	7.38033	1.01667	2741.84	338.388	15.5522	-61.9363	2198.89	-15.6881	7865.21	133588	1.13225e+06	0.00917836	0.0013749	0.0211927	0.0178963
2014-11-13 23:00:00	23.0433	29.3617	7.50833	94.4833	6.83667	2.27077	11.1248	1.01667	2275.79	308.825	11.4494	-61.35	1310.89	-14.1053	57465.1	670145	595695	0.00611682	0.000766367	0.0158473	0.0134261
2014-11-14	22.8067	28.9833	7.52	94.1833	6.85833	2.42199	14.1102	1.8	1691.77	266.945	7.54358	-59.5024	901.105	-12.747	197028	1.17334e+06	92501.7	0.00469226	0.00137831	0.0124425	0.00938149
2014-11-14 01:00:00	22.575	30.27	7.49667	88.9667	6.45667	2.57273	12.1283	0.433333	1501.96	252.184	5.89214	-58.9998	792.099	-12.3593	380176	1.25963e+06	6205.42	0.00207521	0.00017538	0.00528105	0.00507085
2014-11-14 02:00:00	22.5767	31.7533	7.53667	88.6833	6.38	2.70759	12.5492	0	1253.22	228.856	4.44127	-57.3727	665.346	-11.6882	546872	1.26529e+06	546.799	0.00106347		0.00261032	0.00291349
2014-11-14 03:00:00	22.34	32.8183	7.58667	90.6333	6.51	2.79909	6.51567	0	996.153	201.966	4.10585	-56.2038	602.634	-11.1626	661623	1.26575e+06	87.4935	0.000906014		0.00170935	0.00202169
2014-11-14 04:00:00	22.4533	32.9233	7.59	89.5167	6.41333	2.78251	6.5075	0.0666667	1189.83	223.127	4.2797	-56.2497	591.334	-10.9883	640677	1.26571e+06	134.048	0.00101588	4.58953e-06	0.00195914	0.00223506
2014-11-14 05:00:00	22.3583	31.9217	7.50333	84.3	6.085	2.67157	6.64667	0.0666667	1468.04	249.274	4.50427	-56.0735	635.747	-11.3411	502391	1.2648e+06	1041.28	0.00111238	5.10943e-06	0.00220962	0.00250397
2014-11-14 06:00:00	22.5417	30.885	7.415	79.25	5.73667	2.54418	7.89717	0.2	1420.03	246.006	4.56341	-55.6203	705.995	-11.5864	344656	1.25593e+06	9912.04	0.00119513	1.47902e-05	0.00262251	0.00277294
2014-11-14 07:00:00	22.585	30.4667	7.34333	76.7	5.55833	2.43983	6.63617	0.516667	1484.1	251.938	5.11189	-56.1857	795.475	-11.8999	216793	1.20499e+06	60849.6	0.00166544	0.000104659	0.00368592	0.00346047
2014-11-14 08:00:00	22.59	30.4867	7.26833	72.4	5.245	2.33821	6.98983	1.25	1424.98	245.949	5.83153	-57.0034	879.704	-12.1688	106834	995992	269848	0.00267014	0.000499272	0.00628319	0.00493022
2014-11-14 09:00:00	22.84	30.7017	7.22333	69.48	5.012	2.29969	3.33617	1.23333	1301.13	233.41	4.24203	-53.7536	856.845	-12.7648	74062.7	825353	440487	0.0014995	0.000252188	0.00304898	0.00237039
2014-11-14 10:00:00	23.3567	29.765	7.38333			2.36081	9.73083	1.85	1597.11	256.89	8.72017	-59.6626	1066.84	-13.0297	130212	1.05423e+06	211610	0.00592182	0.00182971	0.0142463	0.0106608
2014-11-14 11:00:00	23.9317	28.4983	7.51			2.48503	9.90583	2.23333	1774.95	269.34	7.82991	-59.6601	865.758	-12.2636	271459	1.23561e+06	30230.6	0.00599582	0.00237742	0.0133204	0.00977953
2014-11-14 12:00:00	24.51	28.5283	7.52333	94.8333	6.71667	2.65342	14.9697	2.61667	1509.55	246.251	7.15488	-59.4795	847.209	-12.0216	480000	1.2643e+06	1537.99	0.00620721	0.00296513	0.0136156	0.0101708
2014-11-14 13:00:00	24.925	30.485	7.56833	100.25	6.975	2.80374	16.218	2.28333	2021.24	278.733	6.24568	-59.5464	723.266	-11.1525	668208	1.26574e+06	104.326	0.00455587	0.00183911	0.0104554	0.00784825
2014-11-14 14:00:00	24.8833	32.0783	7.625	101.4	6.995	2.94216	14.7195	2.15	2913.22	338.149	14.4667	-63.5658	682.435	-15.5604	853563	1.26583e+06	7.94567	0.0126978	0.00468485	0.0289497	0.0217267
2014-11-14 15:00:00	23.9733	33.86	7.675	102.633	7.12167	3.02398	8.81867	1.31667	1568.36	240.567	6.22504	-60.5476	565.825	-13.9736	968380	1.26584e+06	1.52537	0.00315338	0.000609761	0.00704006	0.00556798
2014-11-14 16:00:00	24.8833	33.7017	7.68167	104.533	7.14333	2.98253	2.84	2.43333	2037.05	267.962	9.37776	-62.3164	596.23	-11.9797	909875	1.26584e+06	3.65074	0.0086676	0.00395342	0.0152783	0.0108997
2014-11-14 17:00:00	26.0083	31.7167	7.62833	105.8	7.175	2.8353	7.23	1.85	3630.31	377.435	21.4414	-65.1668	827.686	-12.0932	709656	1.26577e+06	69.2631	0.0186108	0.00578172	0.0363812	0.0277791
2014-11-14 18:00:00	25.525	31.0383	7.53167	98.8	6.78	2.65836	15.0592	1.71667	4362.66	417.991	32.6812	-65.0556	929.723	-12.0129	486067	1.26423e+06	1608.47	0.0278678	0.00806293	0.0655382	0.0514609
2014-11-14 19:00:00	24.7017	31.48	7.44833	90.0833	6.255	2.47632	15.6472	1.91667	5467.8	470.956	47.4515	-64.8356	1199.68	-12.5305	261166	1.22726e+06	38582.1	0.0430886	0.0140564	0.105718	0.0811856
2014-11-14 20:00:00	24.5967	31.4	7.33167	82.25	5.72333	2.31022	13.772	1.4	6685.21	521.298	65.2221	-64.8308	1605.21	-13.0852	86386.1	850566	415274	0.0498632	0.0105587	0.126311	0.101838
2014-11-14 21:00:00	24.84	31.1617	7.19333	74.8667	5.195	2.17227	13.0617	1.85	7609.53	555.134	82.2527	-64.0588	2370.06	-13.8693	14612	229583	1.03626e+06	0.0746427	0.0231981	0.179657	0.138615
2014-11-14 22:00:00	25.2183	31.0867	7.12	72.5167	5.00167	2.11072	5.8655	0.216667	8269.89	577.219	108.39	-64.0366	2813.7	-13.9534	4793.4	83232.9	1.18261e+06	0.0561255	0.00128781	0.0991954	0.109791
2014-11-14 23:00:00	24.8617	30.6417	7.22833	78.7333	5.48833	2.15706	8.385	0	8339.37	583.032	129.851	-63.7943	2582.19	-13.5656	12062	192298	1.07354e+06	0.0620356		0.123148	0.143653
2014-11-15	23.8933	29.165	7.52333	95.1833	6.79167	2.29689	11.3827	0.0666667	6381.86	513.981	115.502	-63.2104	1070.96	-11.6929	77096.2	783961	481879	0.0551695	0.000222543	0.128898	0.142064
2014-11-15 01:00:00	23.7333	28.9433	7.52	94.5167	6.77333	2.45677	10.104	1.23333	5358.26	472.905	94.9238	-62.8001	1055.76	-12.0059	236931	1.22059e+06	45252.7	0.0679124	0.0116104	0.16441	0.1329
2014-11-15 02:00:00	23.4783	29.64	7.515	91.35	6.55	2.60176	13.816	1.48333	4728.27	445.36	81.0441	-62.5343	987.24	-11.6305	416130	1.26145e+06	4393.51	0.0626524	0.0144528	0.160367	0.126078
2014-11-15 03:00:00	23.4783	31.8433	7.56667	91.9667	6.51167	2.74621	11.9868	1.85	4955.33	456.07	67.0704	-62.4073	836.052	-10.7009	595044	1.26554e+06	303.84	0.0587304	0.0183495	0.140402	0.104847
2014-11-15 04:00:00	23.1017	32.82	7.59167	91.6833	6.49667	2.85272	7.56617	1.1	4603.59	441.993	58.1398	-62.6453	749.202	-10.1875	731819	1.2658e+06	35.5916	0.0384601	0.00560057	0.0873521	0.0708322
2014-11-15 05:00:00	23.115	33.435	7.61333	91.95	6.495	2.8582	5.89333	0.733333	4763.88	450.71	53.241	-62.8857	745.162	-10.2396	739155	1.26581e+06	32.8855	0.0308535	0.00241554	0.0634519	0.056166
2014-11-15 06:00:00	23.12	33.1967	7.58833	90.2333	6.37667	2.77574	8.60317	0.65	4910.55	460.234	51.207	-63.106	813.762	-10.5749	632358	1.26567e+06	173.329	0.0287744	0.00188648	0.0628212	0.0570655
2014-11-15 07:00:00	23.1233	30.8417	7.475	83.45	5.97833	2.65978	10.3707	0.816667	5435.68	486.919	52.8348	-63.1871	1077.25	-11.7119	487832	1.2643e+06	1544.64	0.0315319	0.00282229	0.0749968	0.0652311
2014-11-15 08:00:00	23.36	30.3633	7.42833	80.55	5.76333	2.55155	9.524	0.733333	5485.87	481.472	57.1885	-63.2566	1241.83	-12.0091	353848	1.25529e+06	10550.9	0.0334661	0.00258917	0.0767884	0.0684952
2014-11-15 09:00:00	23.56	30.38	7.39333	77.1333	5.5	2.45971	5.941	0.566667	5375.53	474.588	62.3634	-63.2269	1382.29	-12.0691	239986	1.22775e+06	38093.6	0.0347845	0.00183972	0.0698303	0.0656687
2014-11-15 10:00:00	23.7833	30.1417	7.34833	74.95	5.325	2.39751	6.54933	1.16667	5958.43	500.108	69.6263	-63.4094	1551.19	-12.2575	167178	1.15909e+06	106749	0.0481874	0.00757172	0.106199	0.0860873
2014-11-15 11:00:00	23.9283	30.2417	7.385	81.44	5.774	2.45582	9.44833	1.31667	5897.78	495.66	75.4095	-63.4899	1377.9	-11.739	235580	1.22204e+06	43795.8	0.0565196	0.012384	0.131365	0.105776
2014-11-15 12:00:00	24.06	30.2367	7.53	96.0333	6.79	2.57899	9.017	2.45	5208.22	463.17	71.306	-63.3606	1040.94	-11.14	387951	1.26031e+06	5531.24	0.0820085	0.0386718	0.16702	0.125378
2014-11-15 13:00:00	24.235	30.2933	7.54667	96.55	6.805	2.72034	9.012	3.58333	4437.51	425.627	61.4725	-63.1283	985.629	-11.2532	562579	1.26545e+06	389.246	0.0998226	0.0622323	0.180426	0.133376
2014-11-15 14:00:00	24.2667	31.8683	7.585	99.6	6.942	2.85539	10.9813	4.25	4171.2	417.791	49.7104	-63.4304	856.909	-10.6319	735565	1.2658e+06	37.1416	0.103184	0.0713281	0.165292	0.131073
2014-11-15 15:00:00	23.825	33.5683	7.63833	100.817	7.02333	2.96666	9.82067	4.91667	3498.97	388.631	45.438	-63.7664	741.964	-9.91899	887545	1.26584e+06	4.65329	0.119921	0.0867787	0.168805	0.145178
2014-11-15 16:00:00	23.435	34.2067	7.65167	98.4333	6.87833	3.02637	7.089	4.23333	3210.75	367.569	42.9504	-64.1244	715.542	-9.75395	971802	1.26584e+06	1.46282	0.0855187	0.0592149	0.138667	0.106172
2014-11-15 17:00:00	23.365	34.2117	7.64333	98.2167	6.87167	2.97396	6.88467	2.97667	3166.73	363.193	41.5589	-64.5156	725.793	-9.75838	897993	1.26584e+06	4.70577	0.0555264	0.0312988	0.104257	0.0760258
2014-11-15 18:00:00	23.7067	33.7217	7.63	99.45	6.93667	2.81952	12.2013	2.9	2998.13	352.306	34.0178	-65.2569	776.223	-10.1992	689541	1.26574e+06	98.7441	0.0415162	0.0215498	0.0838229	0.0593136
2014-11-15 19:00:00	24.2133	31.5767	7.52667	93.0333	6.51167	2.67227	13.2483	1.85	3998.05	405.988	32.9325	-65.4266	996.608	-11.2533	503306	1.26468e+06	1156.23	0.0284744	0.00933235	0.0667894	0.0516819
2014-11-15 20:00:00	24.2667	31.13	7.46	87.1833	6.11333	2.4905	17.666	1.55	5156.34	460.833	43.8288	-65.1309	1190.75	-11.7792	278372	1.2355e+06	30337.1	0.0349929	0.008981	0.0919809	0.07287
2014-11-15 21:00:00	24.3783	30.765	7.31167	76.7667	5.38333	2.32867	14.9722	0.716667	6152.16	502.05	61.9041	-63.6969	1849.02	-13.2881	106039	894771	371069	0.0370275	0.00391547	0.096997	0.0893445
2014-11-15 22:00:00	24.5533	30.6967	7.11	66.9667	4.68333	2.20617	10.0873	0.133333	7752.91	562.035	88.9566	-64.1527	2674.9	-13.7747	24270.1	352756	913084	0.0441552	0.000412115	0.0988678	0.106665
2014-11-15 23:00:00	24.5467	30.8983	7.035	64.2	4.48667	2.1592	6.43267	0.0666667	9098.57	610.478	117.873	-64.3287	3158.48	-13.9145	10541.7	176456	1.08938e+06	0.0570527	0.00022766	0.102513	0.119411
2014-11-16 00:00:00	24.48	30.935	7.02333	62.7667	4.38833	2.18423	12.8377	0	8167.32	580.611	138.995	-64.2192	3107.63	-13.7006	22375.6	307073	958767	0.0658679		0.154091	0.173473
2014-11-16 01:00:00	23.7233	29.57	7.47167	88.9167	6.34833	2.3331	12.8753	0.266667	6099.8	504.15	126.126	-63.6343	1171.78	-11.2765	107476	927331	338509	0.0646719	0.00107655	0.157272	0.160459
2014-11-16 02:00:00	23.4883	29.5217	7.47167	88.5833	6.35333	2.48251	14.2037	0.266667	5545.48	483.382	101.006	-63.3845	1070.48	-11.2074	268826	1.22829e+06	37549	0.0511694	0.000831169	0.126231	0.128724
2014-11-16 03:00:00	23.4233	31.5767	7.48833	86.2833	6.12333	2.63346	11.327	0.266667	5311.07	472.212	82.0699	-63.3073	973.317	-10.8279	455424	1.26386e+06	1984.52	0.041369	0.000699274	0.0953664	0.097635
2014-11-16 04:00:00	23.2583	33.2467	7.55167	88.1667	6.215	2.79641	13.4387	0.2	4269.67	424.127	65.6985	-63.3154	831.544	-10.1185	658872	1.26571e+06	125.441	0.0318417	0.000394645	0.0790916	0.0822431
2014-11-16 05:00:00	22.9867	33.7133	7.565	87.9833	6.21167	2.87967	6.1045	0.65	3888.03	406.607	54.9913	-63.5544	782.832	-9.88104	767767	1.26582e+06	20.8776	0.0308174	0.00199374	0.0620097	0.0563836
2014-11-16 06:00:00	22.81	33.9217	7.57333	87.0833	6.16333	2.89736	8.54433	1.18333	3386.6	403.46	43.4925	-63.932	813.213	-10.3558	791814	1.26582e+06	15.9696	0.0296575	0.00534515	0.0730079	0.0580863
2014-11-16 07:00:00	22.9	33.84	7.55667	85.7833	6.06167	2.80071	6.15983	1.46667	3887.34	420.297	40.1031	-64.3352	824.404	-10.2275	663956	1.26574e+06	96.1867	0.0294207	0.00657211	0.0657475	0.0496538
2014-11-16 08:00:00	22.9017	32.3083	7.46833	80.25	5.725	2.65499	12.5065	1.76667	4637.62	442.462	43.1015	-64.4116	1019.84	-11.0297	481940	1.26435e+06	1491.66	0.0353575	0.0103774	0.089941	0.0677281
2014-11-16 09:00:00	23.0817	31.2517	7.40833	77.55	5.54667	2.54215	7.24017	0.583333	5270.2	472.777	50.004	-64.3614	1203.46	-11.5689	342147	1.25688e+06	8961.06	0.0282906	0.00354434
2014-11-16 10:00:00	23.1433	30.94	7.35167	75.3333	5.39333	2.43816	10.5282	1.98333	5437.61	480.243	58.8856	-64.4014	1357.86	-11.7511	214679	1.20475e+06	61092.6	0.0538788	0.0189361	0.127018	0.0939001
2014-11-16 11:00:00	23.2117	30.9467	7.29333	71.5333	5.11167	2.3742	3.226	3.43333	5879.64	498.426	67.0572	-64.326	1522.85	-11.9699	142475	1.10581e+06	160031	0.100907	0.0608336	0.180414	0.127085
2014-11-16 12:00:00	23.55	31.0183	7.31	72	5.12333	2.4	8.01283	3.41667	5300.15	470.211	69.5973	-64.4595	1386.63	-11.5196	170604	1.15637e+06	109467	0.106278	0.0642265	0.203578	0.147952
2014-11-16 13:00:00	23.9617	31.175	7.48333	91.95	6.47	2.48718	9.13583	2.68333	4768.71	443.903	64.602	-64.3827	1062.66	-10.6748	273951	1.23854e+06	27295.4	0.0765172	0.0369822	0.160888	0.115806
2014-11-16 14:00:00	24.085	31.4183	7.52333	93.8167	6.58833	2.60799	13.2162	2.6	3964.92	404.342	58.5693	-64.2498	997.41	-10.527	423834	1.2621e+06	3735.56	0.0676309	0.0317969	0.150765	0.11033
2014-11-16 15:00:00	24.0683	32.13	7.54333	96.0333	6.71833	2.75277	13.1052	2	3703.84	391.62	52.4208	-63.7979	933.897	-10.1738	603333	1.26558e+06	256.95	0.0483544	0.0164712	0.114326	0.0852905
2014-11-16 16:00:00	23.4967	33.2283	7.57333	95	6.66667	2.87509	13.0903	1.86667	3505.68	384.037	48.2182	-63.8289	815.613	-9.35097	761990	1.26581e+06	27.0744	0.0417515	0.0130229	0.102459	0.0764752
2014-11-16 17:00:00	23.11	33.8517	7.59	95.1333	6.7	2.95652	10.2213	1.7	3379.01	378.522	48.6867	-66.3408	830.877	-10.4697	873356	1.26583e+06	5.52211	0.039509	0.0110462	0.0942555	0.0705344
2014-11-16 18:00:00	22.7033	34.1783	7.595	93.8167	6.64167	2.93648	4.01433	3.55	2716.3	338.172	47.4923	-66.6902	716.696	-10.2128	845496	1.26583e+06	7.89935	0.0871163	0.0563694		0.106833
2014-11-16 19:00:00	22.945	33.8217	7.58167	93.2833	6.58667	2.82063	9.63667	3.65	2670.91	333.915	46.8924	-66.4056	748.204	-10.1914	690002	1.26576e+06	75.4659	0.0887702	0.057671	0.147161	0.116647
2014-11-16 20:00:00	23.465	32.7667	7.52167	91.5333	6.44667	2.68144	13.9483	0.416667	3378.76	373.864	45.6528	-66.4843	892.567	-10.7593	514565	1.26498e+06	863.381	0.0251024	0.00193323	0.0646053	0.060798
2014-11-16 21:00:00	23.7083	32.1633	7.465	86.7333	6.10667	2.52757	17.8352	0.133333	4602.3	437.384	45.0253	-66.0757	1048.31	-11.3336	324181	1.24824e+06	17598.1	0.0214501	0.000216929	0.0591334	0.0614193
2014-11-16 22:00:00	24.0583	31.6067	7.33833	78.9167	5.54	2.36138	13.645	0.433333	5145.39	461.706	52.9332	-66.0898	1462.49	-12.2866	131264	1.05112e+06	214718	0.0284334	0.00134535	0.0735709	0.0712127
2014-11-16 23:00:00	24.0983	31.21	7.14833	68.3	4.80167	2.23407	11.1568	0.266667	6332.96	512.378	70.2624	-66.0887	2248.41	-13.3724	35406.9	478706	787134	0.0357781	0.000594359	0.086826	0.0887099
2014-11-17 00:00:00	23.9833	31.1583	7.06333	65.45	4.60833	2.19797	6.12533	0	7411.88	555.408	93.2718	-65.6359	2694.89	-13.724	19679.5	302159	963681	0.0433559		0.0804142	0.0954113
2014-11-17 01:00:00	23.6983	30.5933	7.18333	72.2667	5.14333	2.26198	12.1112	0.0666667	7159.72	547.063	109.634	-65.177	2311.16	-13.0129	54120.5	622972	642868	0.0521658	0.000237701	0.123085	0.135012
2014-11-17 02:00:00	23.2683	29.21	7.47	89.7833	6.475	2.41899	11.2165	0.0666667	4975.38	456.302	97.9477	-64.4835	1054.32	-11.4521	193259	1.1727e+06	93138.2	0.0455494	0.000112544	0.109748	0.121272
2014-11-17 03:00:00	22.94	29.5417	7.46333	87.8667	6.36	2.60067	15.65	0.2	4585.57	441.624	83.3125	-64.0156	1001.92	-11.3984	414749	1.26121e+06	4627.17	0.0405904	0.000508663	0.109042	0.112109
2014-11-17 04:00:00	22.7033	30.9833	7.47	84.6167	6.105	2.76832	16.3317	0.483333	4200.33	424.416	70.7713	-63.8527	876.101	-10.5888	623427	1.26561e+06	231.773	0.0377077	0.00148755	0.103611	0.0975301
2014-11-17 05:00:00	22.275	33.5683	7.535	86.6667	6.20667	2.94039	10.7997	0.266667	3363.28	380.909	58.6389	-63.8151	772.204	-10.0834	850987	1.26583e+06	7.68679	0.02835	0.000466931	0.0686498	0.0696704
2014-11-17 06:00:00	21.9883	33.8967	7.54	85.4833	6.13833	3.04	10.1337	0.483333	3096.84	368.629	52.0483	-63.9701	740.677	-9.98365	991327	1.26584e+06	1.18667	0.0268189	0.00103202	0.0655069	0.0616871
2014-11-17 07:00:00	21.6783	33.9367	7.53	84.55	6.10167	3.0255	3.3205	0.566667	3122.73	370.704	47.7866	-64.0645	738.246	-10.0578	970699	1.26584e+06	1.66435	0.0247988	0.0011671	0.044193	0.0413276
2014-11-17 08:00:00	21.855	33.4117	7.515	84.0167	6.06667	2.89042	9.9715	0.966667	2839.8	348.56	46.0893	-64.1384	751.934	-9.99317	782940	1.26582e+06	22.9745	0.0271189	0.00272885	0.0685164	0.0572853
2014-11-17 09:00:00	22.555	31.2067	7.42333	81.3	5.885	2.7214	14.1712	2.68333	2348.88	312.325	11.822	-63.5622	950.252	-12.3948	564054	1.26539e+06	445.72	0.0142531	0.00833561	0.0303254	0.022046
2014-11-17 10:00:00	23.1167	30.9533	7.365			2.58081	11.4185	3.8	2772.8	340.867	13.4518	-64.5526	1095.89	-12.6474	390218	1.26028e+06	5558.26	0.0199445	0.0129472	0.0384241	0.0284372
2014-11-17 11:00:00	23.555	30.8283	7.265			2.44299	10.8522	4.1	3349.81	373.009	18.4264	-66.0371	1389.11	-13.1942	220271	1.21074e+06	55103.8	0.0327749	0.0222999	0.0576379	0.0444594
2014-11-17 12:00:00	23.965	30.9183	7.19833			2.36414	6.859	5.15	3798.3	398.994	22.7409	-66.6581	1616.44	-13.562	132133	1.07929e+06	186553	0.0597305	0.0443991	0.0824916	0.0710254
2014-11-17 13:00:00	24.17	30.9	7.17			2.36681	3.0155	4.9	3445.87	387.374	46.6821	-65.573	1644.69	-13.5986	134961	1.08534e+06	180496	0.0236795	0.0104236	0.0672907	0.0595788
2014-11-17 14:00:00	24.41	30.72	7.492	96.4	6.756	2.47621	10.5902	3.58	2819.73	341.059	21.659	-64.7322	968.409	-12.263	260574	1.23236e+06	33476.7	0.0207354	0.0118706	0.049897	0.0412227
2014-11-17 15:00:00	24.6767	31.0817	7.51333	99.1833	6.90667	2.62848	13.6625	2.36667	2226	299.679	11.1346	-63.6776	841.141	-11.8787	449245	1.26349e+06	2345.86	0.0103379	0.00450372	0.0232085	0.0173087
2014-11-17 16:00:00	24.6617	31.5967	7.52167	99.8833	6.93833	2.76207	10.591	2.36667	2119.93	292.385	9.80919	-63.3655	791.608	-11.5801	614879	1.26563e+06	205.071	0.00860043	0.0036043	0.0184762	0.0135721
2014-11-17 17:00:00	23.805	33.0117	7.545	99.3333	6.945	2.9142	12.2497	2.08333	1843.79	275.31	9.63981	-63.6581	701.379	-10.9646	815036	1.26583e+06	13.4668	0.00754362	0.00277532	0.0173345	0.0127772
2014-11-17 18:00:00	23.1767	33.78	7.565	98.8667	6.95667	2.99006	7.513	1.91667	1751.17	270.173	9.14727	-63.3532	665.792	-10.7115	920317	1.26584e+06	2.84054	0.00673519	0.00242563	0.0143719	0.0105494
2014-11-17 19:00:00	22.97	33.61	7.565	98.7	6.97667	2.96386	4.659	1.26667	1723.17	267.467	9.37191	-63.4659	664.32	-10.7371	883700	1.26583e+06	5.13773	0.00534669	0.00104305	0.0106788	0.00820372
2014-11-17 20:00:00	23.155	33.1933	7.53333	95.0833	6.71833	2.80445	13.8648	0.883333	2100.32	295.796	9.79742	-64.0847	732.188	-11.0888	669408	1.26573e+06	108.758	0.00494615	0.000539043	0.0130898	0.0111677
2014-11-17 21:00:00	23.965	31.8183	7.465	90.6833	6.365	2.62925	17.3915	0.966667	2602.57	326.76	10.8799	-64.7061	890.36	-11.8574	450130	1.26315e+06	2686.9	0.00581299	0.000653241	0.0159098	0.0136872
2014-11-17 22:00:00	24.215	31.3283	7.38333	84.7333	5.93833	2.45148	17.03	0.8	4039.22	403.782	18.4604	-65.7176	1215.07	-13.1693	232523	1.1956e+06	70244.8	0.0105697	0.00107021	0.0293675	0.0258674
2014-11-17 23:00:00	24.3383	31.1233	7.15833	75.0833	5.25833	2.2824	12.0543	0.4	6069.17	498.121	49.1193	-66.9754	2145.56	-13.8683	64175.3	726539	539301	0.0261494	0.000720247	0.0647442	0.0631081
2014-11-18 00:00:00	24.1667	31.165	7.03333	73.1167	5.13333	2.16128	11.2135	0.4	7879.9	570.157	87.5694	-66.3293	2777.44	-14.3497	12052.3	194472	1.07137e+06	0.0469513	0.00111171	0.117501	0.114992
2014-11-18 01:00:00	24.0317	31.245	6.975	72.0833	5.07	2.13267	3.30283	0.133333	8948.74	609.161	122.489	-65.6422	3117.1	-14.4725	6775.42	117790	1.14805e+06	0.0600683	0.000500985	0.0951816	0.110605
2014-11-18 02:00:00	23.6017	30.4167	7.265	82.9	5.91167	2.24322	11.2963	0.566667	7189.96	545.638	134.234	-64.7756	1894.22	-12.848	41537.8	530159	735681	0.0762358	0.0039583	0.192484	0.179495
2014-11-18 03:00:00	23.345	29.5983	7.435	89.3833	6.42333	2.42364	16.3492	0.65	4987.71	458.189	107.865	-64.2106	1064.01	-11.8049	199679	1.16753e+06	98311.4	0.0615366	0.00357405	0.172785	0.158815
2014-11-18 04:00:00	23.18	30.6783	7.425	86.05	6.165	2.61365	16.6518	0.35	4806.13	452.225	87.148	-63.9768	1053.94	-11.6309	430798	1.26209e+06	3754.69	0.0451008	0.00143687	0.124556	0.122295
2014-11-18 05:00:00	22.8067	32.5133	7.47833	87.2167	6.22667	2.81784	15.7352	0.5	4569.94	441.524	69.4726	-63.7591	881.385	-10.9378	687152	1.26574e+06	102.819	0.038763	0.00294751	0.106019	0.0976458
2014-11-18 06:00:00	22.4817	33.6917	7.51	88.35	6.3	2.99512	13.193	0.566667	3835.74	407.15	54.07	-63.8078	795.148	-10.5633	927813	1.26584e+06	3.31451	0.02841	0.00125568	0.0739928	0.0695435
2014-11-18 07:00:00	22.2267	34.085	7.52833	87.9167	6.27833	3.09053	6.57717	0.483333	3350.76	380.221	48.2526	-64.1995	749.158	-10.3935	1.06454e+06	1.26584e+06	0.456806	0.0249152	0.000958257	0.0532168	0.0505651
2014-11-18 08:00:00	22.135	34.0083	7.51833	87.55	6.2725	3.03766	6.26867	0.483333	3314.79	378.956	46.3599	-64.4647	776.668	-10.5442	988306	1.26584e+06	1.48878	0.0241254	0.00106543	0.0489236	0.0460184
2014-11-18 09:00:00	22.54	33.615	7.495	87.35	6.225	2.86766	13.5617	1.1	3653.34	394.167	45.0063	-64.7079	879.548	-10.8249	752709	1.2658e+06	39.4156	0.0283115	0.00477517	0.0719657	0.0620294
2014-11-18 10:00:00	23.155	31.8583	7.40667	83.42	5.936	2.68362	16.4662	3.28333	4466.97	434.12	45.5905	-64.9287	1106.33	-11.5907	517389	1.26477e+06	1074.39	0.0641865	0.0373247	0.140026	0.102855
2014-11-18 11:00:00	23.5433	31.28	7.34667	80.8167	5.73167	2.51469	14.1022	3.78333	5599.42	483.828	51.4227	-65.3239	1310.01	-12.0732	308194	1.24509e+06	20752.5	0.0867469	0.055951	0.169909	0.127445
2014-11-18 12:00:00	23.81	31.1783	7.25667	76.725	5.42	2.36507	11.6927	3.88333	6405.28	516.259	63.1825	-65.5794	1633.07	-12.5647	134021	1.0715e+06	194336	0.1122	0.073475	0.209234	0.158603
2014-11-18 13:00:00	24.2967	31.0133	7.17667	76.95	5.395	2.26915	8.74683	4.78333	6800.35	528.153	79.424	-65.5644	1998.62	-13.0228	52943.8	659925	605915	0.203322	0.147135	0.294385	0.248571
2014-11-18 14:00:00	24.6517	30.9517	7.235	83.65	5.82833	2.3017	6.4345	5.13333	6522.79	514.721	91.2083	-65.4206	1793.77	-12.6571	77756.6	820941	444899	0.271752	0.200724	0.343373	0.306826
2014-11-18 15:00:00	24.8283	30.04	7.45667	97.35	6.8	2.44409	13.2412	3.78333	4672.3	431.898	76.8188	-64.7704	1054.77	-11.631	222545	1.20168e+06	64164.5	0.138882	0.0899636	0.249551	0.193689
2014-11-18 16:00:00	24.8733	30.6383	7.47	97.2667	6.76667	2.60627	12.9547	3.56667	3954.83	400.491	62.5022	-64.4478	991.77	-11.5841	421769	1.26231e+06	3527.82	0.104467	0.0655595	0.193751	0.147138
2014-11-18 17:00:00	24.38	31.835	7.48833	97.5	6.795	2.7891	14.5125	4.38333	3860.12	398.594	53.5578	-64.3267	902.71	-11.1758	649763	1.26568e+06	160.128	0.117021	0.0824066	0.192053	0.154793
2014-11-18 18:00:00	23.6367	33.36	7.525	98.2	6.87333	2.95928	11.4507	3.43333	3514.55	383.722	47.9448	-64.3694	776.31	-10.5562	877513	1.26583e+06	6.42655	0.0747626	0.0461121	0.144297	0.106491
2014-11-18 19:00:00	22.995	34.1383	7.555	97.5167	6.86833	3.06455	7.238	1.63333	3346.68	377.663	45.6912	-64.6441	711.198	-10.1817	1.02668e+06	1.26584e+06	0.748283	0.0400963	0.0143225	0.0857598	0.0640947
2014-11-18 20:00:00	22.8767	34.1667	7.55	96.3667	6.80333	3.01505	5.609	0.133333	2606.81	320.553	44.589	-64.9236	716.021	-10.2139	955939	1.26584e+06	2.17817	0.0206067	0.000179019	0.0351566	0.039955
2014-11-18 21:00:00	23.2867	33.4017	7.51	93.4833	6.58167	2.83664	16.9098	0	770.854	128.396	44.1279	-65.1111	751.459	-10.8167	711832	1.26577e+06	72.9348	0.019428		0.0450465	0.0508533
2014-11-18 22:00:00	24.23	31.5317	7.425	89.1	6.23833	2.65501	16.1463	0.0666667	203.185	53.954				-11.4016	481947	1.26416e+06	1683.46
2014-11-18 23:00:00	24.5467	31.0583	7.34333	83.7333	5.845	2.46527	17.0863	0	2190.41	243.153	11.2508	-64.3399	1333.03	-12.7024	248059	1.21704e+06	48799.1	0.00443417		0.0115509	0.012731
2014-11-19 00:00:00	24.7883	30.905	7.19333	76.7667	5.34167	2.30023	14.1903	0.0666667	5434.65	467.879	34.389	-65.8887	1945.52	-13.525	78413.4	805231	460609	0.0160013	6.11538e-05	0.0399627	0.0435659
2014-11-19 01:00:00	24.7317	31.0433	7.035	70.8167	4.92833	2.1931	8.67383	0.733333	6958.92	532.719	68.3466	-65.7857	2794.49	-14.1809	18231.2	283205	982635	0.0418021	0.00378362	0.0943503	0.0856922
2014-11-19 02:00:00	24.5883	31.1183	6.985	67.45	4.70333	2.22594	5.95767	2.28333	7760.77	565.014	100.961	-65.2594	2782.77	-13.9287	30936.9	433183	832657	0.109988	0.0494476	0.209686	0.15992
2014-11-19 03:00:00	23.7717	30.2117	7.36	86.1	6.12167	2.38257	16.4072	2.96667	5111.54	450.553	75.2146	-63.7386	1170.58	-11.5838	156971	1.06573e+06	200111	0.0963258	0.0503211	0.215384	0.157703
2014-11-19 04:00:00	23.7117	30.295	7.40333	88.1667	6.27	2.60449	17.6385	2.9	3584.12	386.678	31.7234	-63.5244	989.116	-12.2518	419405	1.2611e+06	4744.14	0.0396198	0.0209776	0.089921	0.066737
2014-11-19 05:00:00	23.435	31.9333	7.43333	88.0167	6.23167	2.8447	17.4615	3.11667	2939.43	351.408	18.4091	-62.9558	856.942	-11.6854	722942	1.26576e+06	77.9414	0.0228998	0.0127585	0.0510057	0.0373326
2014-11-19 06:00:00	22.855	33.7767	7.49833	89.4833	6.335	3.09205	18.3172	3.8	2318.38	314.085	13.1877	-62.6982	723.035	-10.8493	1.06905e+06	1.26584e+06	0.841571	0.0191002	0.0122965	0.0392639	0.0291351
2014-11-19 07:00:00	22.1633	34.5033	7.53667	89.4	6.37833	3.26976	20.6278	3.43333	1695.81	261.023	13.5786	-63.2018	646.759	-10.3498	1.35821e+06	1.26584e+06	0.0230935	0.0174385	0.0105562	0.0393271	0.028399
	21.5718	34.7373	7.52727	87.4909	6.29636	3.33232	21.4282	3.6			4.47175	-63.8739	647.744	-10.213	1.469e+06	1.26584e+06	0.00583947	0.00371001	0.00232164

## Sheet: Barwon Mangrove
Date/Time	Temperature (°C)	Salinity	pH (NBS)	DO(%)	DO mg/L	Depth (m)	Current velocity (cm/s)	Windspeed (m/s)	Rn (dpm/m3)	Rn unc (dpm/m3)	CH4 (nM)	d13C-CH4	pCO2 (uatm)	d13C-CO2	Water Volume (m3)	Water area (m2)	Exposed area (m2)	Flux CH4 (RC01) (mmol/m2/d)	Flux CH4 (W92) (mmol/m2/d)	Flux CH4 (BO04) (mmol/m2/d)	Flux (HO14) (mmol/m2/d)
2014-11-21 16:00:00
2014-11-21 17:00:00	21.1367	32.8589	7.6899	100.346	6.14067	2.0688	8.6787	4.88889	714.089	165.497					11759.9	39361.4	452232
2014-11-21 18:00:00	21.253	32.7821	7.68117	101.958	6.2301	1.99503	8.22467	6.94444	818.275	186.074					8383.77	17395.9	474197
2014-11-21 19:00:00	21.229	32.687	7.65783	101.564	6.21397	1.94756	8.61255	5.91667	907.976	193.156					6131.04	11173.6	480419
2014-11-21 20:00:00	20.9015	32.7761	7.6638	102.339	6.29552	1.96191	14.117	5.13889	749.871	168.492					6810.5	12942.6	478650
2014-11-21 21:00:00	19.4971	33.2077	7.83453	110.015	6.92457	2.11554	18.1789	3.34722	538.319	151.55					13969.3	62549.6	429043
2014-11-21 22:00:00	19.1935	33.1946	7.84642	107.347	6.79945	2.34678	46.3208	2.83333	536.903	155.451					43686.7	213613	277980
2014-11-21 23:00:00	19.1899	33.4988	7.83092	104.889	6.63137	2.60597	38.8628	3.34722	544.769	159.202					151819	409089	82504.1
2014-11-22	18.9199	34.2101	7.80667	102.572	6.48905	2.8463	14.5348	4.125	708.216	183.37					293081	524061	-32468
2014-11-22 01:00:00	18.4167	34.2905	7.80177	100.84	6.43662	2.95992	6.89686	3.08333	793.186	194.513					360670	532111	-40517.9
2014-11-22 02:00:00	18.5116	33.8058	7.8099	99.6453	6.36792	2.87034	14.01	3.09722	604.713	163.964					307465	529845	-38252.1
2014-11-22 03:00:00	18.5186	33.5832	7.7995	98.8915	6.32968	2.67321	32.2422	2.31944	806.325	195.334					189825	452047	39545.9
2014-11-22 04:00:00	18.4589	33.4972	7.78248	96.6288	6.19362	2.46387	32.282	3.09722	775.423	190.422					80447.3	305144	186449
2014-11-22 05:00:00	18.4507	33.419	7.75127	94.1163	6.04055	2.32897	23.4536	3.61111	888.976	206.337					36885	198950	292643
2014-11-22 06:00:00	18.4271	33.4053	7.73117	91.6762	5.88245	2.23721	9.91358	2.56944	1124.38	231.766					21743.5	131562	360031
2014-11-22 07:00:00	18.4146	33.3752	7.71117	89.5662	5.75008	2.18322	7.07246	4.375	1303.69	250.85					17156.7	96422	395171
2014-11-22 08:00:00	18.3623	33.4557	7.7021	88.5753	5.68763	2.17996	14.3849	1.54167	999.359	219.794					17064.5	94735.6	396857
2014-11-22 09:00:00	18.1544	33.8589	7.71255	90.3403	5.81262	2.28559	29.09	6.43056	919.623	206.912					28242.5	166069	325524
2014-11-22 10:00:00	18.1566	34.127	7.72375	93.1455	5.98263	2.40785	49.5549	4.63889	1029.53	223.289					58492.4	260766	230827
2014-11-22 11:00:00	18.1556	34.4702	7.74437	97.3747	6.23973	2.56311	26.9762	4.125	911.332	204.781					127145	381181	110412
2014-11-22 12:00:00	18.4112	34.1983	7.72248	96.0432	6.13798	2.66659	21.5936	5.40278	588.375	164.959					185378	451164	40428.7
2014-11-22 13:00:00	18.686	34.4742	7.73838	101.265	6.42778	2.72667	28.5311	7.22454	995.064	215.603					221326	483808	7784.63
2014-11-22 14:00:00	19.2124	34.3895	7.72187	101.806	6.39897	2.61788	33.0105	10.0278	961.815	212.335					157500	419151	72441.7
2014-11-22 15:00:00	19.6724	34.4111	7.72	102.806	6.40687	2.42367	39.9075	10.0995	746.523	181.003					64984.9	273364	218229
2014-11-22 16:00:00	19.8347	34.4616	7.71965	103.601	6.43352	2.27554	23.4521	11.2167	720.173	179.002					27233.9	159190	332403
2014-11-22 17:00:00	20.1407	34.3718	7.70652	104.082	6.43152	2.14089	10.7571	10.7917	943.905	206.706					14990.8	73113.6	418479
2014-11-22 18:00:00	20.3222	34.2799	7.69308	104.086	6.41223	2.03653	12.6263	9	802.546	191.359					10335.5	28280.4	463313
2014-11-22 19:00:00	20.3664	34.2253	7.68107	104.138	6.41208	1.96405	13.5585	5.65278	862.605	197.595					6890.42	12701	478892
2014-11-22 20:00:00	20.3455	34.1754	7.66652	102.473	6.3162	1.93489	11.8843	7.44954	2202.73	300.825					5607.41	10693.3	480900
2014-11-22 21:00:00	20.1615	34.1745	7.66782	100.719	6.22927	1.96401	19.9568	5.66667	5694.11	513.742					6946.38	14024.4	477569
2014-11-22 22:00:00	19.6925	33.9592	7.77603	102.548	6.40605	2.15465	28.9896	4.63889	4243.35	443.502	14.7351	-68.8715	545.837	-10.5181	16689	84988	406605	0.027235	0.0196723	0.0633141	0.0487497
2014-11-22 23:00:00	19.5718	33.9381	7.7993	103.776	6.49658	2.43626	58.0988	4.625	3405.64	399.949	14.5453	-66.9361	520.746	-10.3653	72643.8	283017	208576	0.0270001	0.0194001	0.066838	0.052328
2014-11-23	19.3576	34.3824	7.77818	100.185	6.28223	2.75944	30.3912	3.08333	3416.09	401.154	14.2629	-65.6291	532.763	-10.2211	241089	490234	1358.55	0.0150671	0.00828739	0.0452927	0.0319398
2014-11-23 01:00:00	18.7637	35.3358	7.7855	103.857	6.54912	3.03246	9.36593	2.83333	3352.84	401.725	13.972	-65.4336	496.359	-9.43528	404176	506973	-15380.1	0.0132944	0.00676087	0.0339639	0.0221172
2014-11-23 02:00:00	18.0223	35.9569	7.80858	111.706	7.11498	3.11828	#REF!	3.86111	2650.42	360.693	13.7222	-64.203	426.582	-8.38353	456063	459511	32082.3	0.0182561	0.0119918
2014-11-23 03:00:00	18.0587	35.8378	7.80107	107.74	6.8637	3.01942	15.0899	3.34722	2222.16	328.934	13.5326	-63.5259	434.259	-8.56517	396369	510816	-19222.6	0.0150397	0.00890732	0.0394333	0.0261476
2014-11-23 04:00:00	18.4134	35.4435	7.7635	99.2845	6.29643	2.75571	31.2828	3.61111	2636.21	357.567	13.6022	-64.0192	492.765	-9.308	238819	490843	750.168	0.0166881	0.0104668	0.0479681	0.0336976
2014-11-23 05:00:00	18.5651	34.8997	7.714	90.2843	5.72747	2.51641	32.0109	2.83333	4468.32	463.129	14.1839	-64.2469	596.95	-10.3089	104253	345713	145880	0.0134479	0.00683304	0.0442062	0.0310648
2014-11-23 06:00:00	18.4947	34.6891	7.6796	85.9093	5.4656	2.38565	22.5196	2.31944	4583.94	471.84	15.1239	-64.4545	669.697	-10.8699	51403.2	243151	248442	0.01214	0.00499155	0.0400147	0.0279795
2014-11-23 07:00:00	18.4108	34.6491	7.65783	83.417	5.31457	2.28939	17.8885	1.55556	5267.31	505.976	16.0234	-65.1372	715.605	-11.0214	28866.6	168882	322711	0.00985946	0.00235613	0.0341584	0.0251759
2014-11-23 08:00:00	18.4204	34.6179	7.64238	81.6538	5.20328	2.22593	10.5194	2.05556	5051.24	495.237	16.8694	-65.8467	778.693	-11.2723	20503.4	123772	367821	0.0124701	0.0043682	0.0361185	0.0243599
2014-11-23 09:00:00	18.5692	34.5893	7.62555	81.5297	5.18322	2.21788	10.1002	2.05556	5171.29	499.568	17.582	-66.2511	816.135	-11.3377	19729.1	118356	373237	0.0131311	0.00459974	0.0372258	0.0250443
2014-11-23 10:00:00	19.0469	34.6966	7.66547	91.7562	6.02255	2.27561	25.6699	1.80556	5721.75	541.51	18.3211	-68.4496	792.509	-11.0148	27011.2	158988	332605	0.0128036	0.00382316	0.0457949	0.0337748
2014-11-23 11:00:00	19.6773	35.322	7.80827	124.446	7.70382	2.43229	40.3419	2.83333	4695.6	468.799	18.0517	-68.5032	561.603	-9.62598	69134.4	280158	211435	0.0183338	0.00931637	0.0604385	0.04363
2014-11-23 12:00:00	19.7294	35.6657	7.85393	133.953	8.27353	2.61921	24.4758	3.09722	3445.64	399.913	16.2977	-67.3854	409.948	-8.41087	158169	420094	71498.6	0.0182605	0.0102443	0.0502821	0.0353925
2014-11-23 13:00:00	20.1629	35.6596	7.86753	137.95	8.45435	2.77404	13.9905	3.86111	3398.46	393.695	14.636	-66.008	395.915	-8.6343	249814	503777	-12183.7	0.0209652	0.0137932	0.045637	0.0320948
2014-11-23 14:00:00	20.1745	35.7156	7.84853	131.031	8.02857	2.85351	9.28364	5.13889	2657.64	350.291	13.4246	-66.2515	412.665	-8.93982	297494	529363	-37770	0.0294324	0.0219009	0.0485104	0.0383348
2014-11-23 15:00:00	20.8323	35.5623	7.84355	132.437	8.02165	2.68243	32.831	5.13889	2728.46	350.998	12.6554	-67.2218	437.507	-9.33136	195484	455082	36510.5	0.0279181	0.0207741	0.0525503	0.0428325
2014-11-23 16:00:00	21.1358	35.1408	7.75392	118.162	7.13468	2.45822	32.35	6.68056	3111.96	369.395	12.6549	-68.8766	539.033	-9.99013	78184.8	300676	190917	0.04911	0.0356345	0.0627188	0.0647867
2014-11-23 17:00:00	20.8945	34.8356	7.66753	104.349	6.34153	2.31644	25.5324	7.97222	5045.13	477.41	14.6973	-68.7408	747.752	-11.7682	34411	189474	302119	0.0899775	0.0596785	0.0833976	0.108752
2014-11-23 18:00:00	20.8005	34.7219	7.63617	100.978	6.15078	2.19921	11.574	7.20833	6149.13	527.729	16.7799	-69.0658	841.385	-12.1801	18505.7	106882	384711	0.0810432	0.0569351	0.0834079	0.0958766
2014-11-23 19:00:00	20.7624	34.6454	7.61783	99.5272	6.06795	2.1136	7.68779	5.66667	6249.26	531.135	18.3694	-69.8069	889.467	-12.3256	13649.4	58512.1	433081	0.0517561	0.0389306	0.074095	0.0640687
2014-11-23 20:00:00	20.6558	34.6083	7.60117	98.2997	6.00945	2.05	5.5778	4.375	7160.83	571.537	19.6761	-70.0686	931.784	-12.4309	10963.9	32076.3	459517	0.0355926	0.0250538	0.062761	0.0454357
2014-11-23 21:00:00	20.495	34.6046	7.58965	97.395	5.9669	2.00266	5.91006	2.58333	8231.51	614.35	20.5293	-70.8066	952.552	-12.4545	8759.82	18726.6	472866	0.0197989	0.0091065	0.0444879	0.0290552
2014-11-23 22:00:00	20.2844	34.606	7.57732	95.0318	5.84543	2.00335	8.97845	2.83333	7048.49	571.21	21.028	-70.528	981.489	-12.4845	8786.31	19119.1	472474	0.0219319	0.0110354	0.0512427	0.0340604
2014-11-23 23:00:00	19.6225	34.9327	7.71955	99.803	6.20843	2.17928	30.0948	3.34722	5186.81	493.732	14.7363	-67.585	575.813	-11.066	18692.4	99055.2	392538	0.0189835	0.0119065	0.0563393	0.0411688
2014-11-24 00:00:00	19.5889	35.0409	7.77132	104.383	6.48953	2.47964	59.2542	2.06944	4289.39	448.323	14.9315	-67.0458	551.596	-9.97477	91022	316362	175231	0.0113982	0.00420404	0.0476328	0.0363796
2014-11-24 01:00:00	19.3535	35.279	7.75833	102.311	6.38137	2.84226	29.829	1.80556	4275.53	450.683	15.0447	-66.6035	547.308	-9.45601	290487	510677	-19084	0.0102993	0.00308644	0.0363738	0.0269214
2014-11-24 02:00:00	18.9731	35.7973	7.77595	104.821	6.56378	3.11075	#REF!	2.31944	4058.37	439.735	14.8734	-66.9166	507.548	-8.7467	451494	460891	30702.3	0.0120433	0.00494156
2014-11-24 03:00:00	18.6264	36.0823	7.80612	111.003	6.98397	3.18917	5.32481	2.31944	2737.4	360.637	15.0758	-66.8338	455.087	-7.96837	498899	391346	100247	0.0121145	0.00496752	0.0301377	0.0191891
2014-11-24 04:00:00	18.5593	36.0502	7.79248	107.619	6.78182	3.03643	16.0203	2.58333	2102.8	317.78	15.0742	-65.9991	446.705	-7.78774	406705	498292	-6699.28	0.0132072	0.00607464	0.0383777	0.0257057
2014-11-24 05:00:00	18.4628	35.8715	7.72835	96.2642	6.0845	2.71926	32.562	1.29167	2938.97	376.883	15.1862	-65.7481	507.435	-8.57714	217232	473559	18034.3	0.00876064	0.00206386	0.0344618	0.0272921
2014-11-24 06:00:00	18.2363	35.7011	7.66017	88.3133	5.60982	2.49035	30.3094	1.80556	3806.02	431.04	15.2208	-65.2491	619.936	-9.77374	91671.1	325929	165664	0.0111085	0.00446326	0.038683	0.0295308
2014-11-24 07:00:00	18.1052	35.6393	7.61925	84.0658	5.35903	2.35616	24.3883	3.09722	4609.09	473.863	15.3443	-65.2659	721.054	-10.5481	43335.9	219979	271614	0.0162139	0.00906096	0.0485538	0.0334689
2014-11-24 08:00:00	18.0168	35.6078	7.59293	81.4708	5.19958	2.26175	14.4707	6.74028	5250.91	509.395	15.9242	-65.2005	805.634	-11.1326	24595.2	148647	342946	0.10004	0.0549699	0.0802183	0.123606
2014-11-24 09:00:00	17.9774	35.5841	7.57642	79.5312	5.08093	2.21479	9.61009	10.7301	5638.82	527.584	16.5961	-65.465	856.341	-11.2997	19639.9	116635	374958	0.305374	0.118314	0.120923	0.353253
2014-11-24 10:00:00	17.9966	35.5538	7.56948	79.3025	5.06518	2.19213	13.3677	4.125	6530.62	567.86	17.4204	-65.776	883.933	-11.3074	17835.5	102073	389520	0.0305763	0.0207896	0.0604236	0.0458842
2014-11-24 11:00:00	18.0639	35.6607	7.65812	91.2547	5.81815	2.29692	55.7331	2.83333	5213.48	506.262	18.0447	-66.1564	728.55	-10.3438	32039.8	175579	316014	0.0175831	0.00895003	0.0661147	0.0474969
2014-11-24 12:00:00	18.1018	35.4871	7.75573	104.322	6.65083	2.47123	71.1817	3.27176	4104.94	448.3	17.0755	-65.172	521.881	-8.88807	85708.7	310576	181017	0.0193786	0.0112801	0.0686661	0.0497434
2014-11-24 13:00:00	18.1187	35.26	7.76648	105.861	6.75788	2.65794	42.2025	3.86111	2926.29	376.135	15.4229	-64.1858	482.42	-8.78465	180742	443598	47994.8	0.0215965	0.0141895	0.0602007	0.0437664
2014-11-24 14:00:00	18.121	34.6587	7.73792	104.727	6.70852	2.83983	27.3559	4.68333	3848.58	431.492	14.6042	-64.9322	510.939	-9.25367	289239	523470	-31877	0.0302624	0.0214368	0.0580507	0.0475012
2014-11-24 15:00:00	18.1165	34.0252	7.72443	104.177	6.69938	2.86724	26.6916	4.11111	2862.8	373.344	13.8685	-68.4101	519.453	-9.41274	305603	529398	-37805	0.0212593	0.0144099	0.0494269	0.036164
2014-11-24 16:00:00	18.0753	34.3055	7.65575	95.4163	6.13377	2.62247	40.1826	3.94444	4172.56	450.733	14.0193	-71.5469	711.874	-11.2265	160662	420614	70979.3	0.0223317	0.0142118	0.05426	0.0425863
2014-11-24 17:00:00	18.0842	34.3774	7.58618	87.1052	5.59407	2.42435	29.5497	6.33241	6938.82	584.843	16.2966	-70.4995	840.56	-11.5709	64287.2	273912	217681	0.074803	0.046461	0.085734	0.101747
2014-11-24 18:00:00	17.9926	34.2756	7.51687	79.31	5.10618	2.30683	22.7354	7.45833	7997.04	627.564	18.877	-70.4507	1031.46	-12.3293	32300.4	182098	309495	0.0971542	0.0658197	0.11037	0.127154
2014-11-24 19:00:00	17.9518	34.9143	7.50738	75.12	4.82217	2.21056	11.4059	8.23611	8787.85	660.473	20.81	-69.6243	1066.6	-12.1591	19263.2	113833	377760	0.263029	0.106166	0.126931	0.309752
2014-11-24 20:00:00	17.6696	33.9311	7.43907	71.0853	4.6161	2.14786	5.84568	9.26389	10186.9	714.086	22.8165	-69.8975	1276.38	-12.8913	15203.7	76086.1	415507	0.243082	0.124662	0.14788	0.284297
2014-11-24 21:00:00	17.1117	31.5932	7.36183	72.7213	4.83857	2.09914	4.19736	5.65278	11096.3	751.824	24.7607	-71.7592	1539	-14.1177	13034.9	51471.9	440121	0.0664132	0.0495614	0.104928	0.0847748
2014-11-24 22:00:00	16.4956	29.1679	7.33607	73.78	5.04127	2.06954	5.31527	5.15278	10622.2	743.411	25.119	-73.3681	1609.88	-14.708	11815.8	38891.1	452702	0.055883	0.0413523	0.101952	0.0758294
2014-11-24 23:00:00	16.4674	27.8451	7.3445	74.638	5.14483	2.10027	11.4099	3.59722	10342.2	731.645	25.0835	-73.5707	1409.97	-14.3156	13131	52917.6	438675	0.0322585	0.0202285	0.0830031	0.0543529
2014-11-25 00:00:00	16.673	31.329	7.66207	88.026	5.91625	2.35567	56.1408	3.34722	6373.33	571.372	22.2221	-68.3177	686.026	-11.6836	47945.7	221196	270397	0.0257438	0.0152687	0.0978546	0.0701389
2014-11-25 01:00:00	16.8602	32.5604	7.70752	91.4512	6.08003	2.69134	43.5497	3.34722	4273.96	466.649	20.3416	-63.4037	562.027	-10.8902	201403	454971	36621.7	0.0233115	0.0137826	0.0810999	0.0569437
2014-11-25 02:00:00	17.3444	34.9066	7.73995	94.508	6.13733	3.05885	#REF!	3.86111	4937.23	496.622	18.085	-60.9054	521.569	-9.83993	420310	477670	13923	0.0246719	0.0161832
2014-11-25 03:00:00	16.669	35.6089	7.75767	102.198	6.69593	3.28519	3.88754	3.86111	2874.84	380.872	15.0345	-58.7559	458.591	-8.86973	555400	254088	237505	0.0199604	0.0130646	0.0438553	0.0282051
2014-11-25 04:00:00	16.2667	35.974	7.77475	106.8	7.03433	3.31803	4.57292	3.61111	1948.58	316.444	12.6697	-56.801	413.654	-8.2975	574886	198280	293313	0.0143947	0.00902838	0.034503	0.0210458
2014-11-25 05:00:00	16.1314	35.7709	7.73912	100.669	6.65708	3.09945	12.3171	4.375	1627.5	289.17	11.4245	-56.804	456.067	-8.96531	444609	453939	37654.3	0.0165607	0.011666	0.0395999	0.026859
2014-11-25 06:00:00	15.8238	34.9883	7.6276	86.6867	5.79888	2.79503	21.9062	3.59722	2858.8	384.174	11.7686	-58.4687	604.98	-10.537	262303	506073	-14480.1	0.0131412	0.00826644	0.0398158	0.0266923
2014-11-25 07:00:00	15.5905	34.5958	7.55017	80.111	5.39333	2.60407	19.0556	4.375	4640.7	496.57	12.3712	-60.8659	779.275	-11.5593	149343	410394	81199.2	0.0179999	0.0126844	0.0463772	0.031684
2014-11-25 08:00:00	15.481	34.3679	7.50067	77.4787	5.23593	2.49345	19.7711	4.88889	6147.08	573.036	14.2841	-63.1738	919.561	-12.0469	92352.9	328608	162985	0.0255994	0.0188041	0.0604697	0.0433333
2014-11-25 09:00:00	15.561	34.2043	7.47127	76.9398	5.19823	2.41174	17.0153	6.69444	6379.74	583.148	15.2376	-65.5743	1020.49	-12.3007	59366.7	263859	227734	0.0554043	0.0389751	0.0792406	0.077081
2014-11-25 10:00:00	15.6915	34.104	7.45117	76.6632	5.16808	2.36235	16.2581	7.70833	6342.39	579.579	15.6032	-67.5036	1090.65	-12.5679	44146.6	224613	266980	0.0775364	0.0521921	0.0910667	0.103535
2014-11-25 11:00:00	15.9169	34.0467	7.44	77.4195	5.19703	2.36017	15.1385	7.97222	7092.96	610.288	16.135	-69.1204	1132.7	-12.6978	43574.1	222894	268699	0.0877484	0.0581542	0.0968583	0.115518
2014-11-25 12:00:00	16.2652	34.1366	7.47215	84.4717	5.6258	2.43248	29.813	7.97222	6901.65	598.068	16.7272	-70.131	1090.98	-12.5726	67607.9	280347	211246	0.0926421	0.0613592	0.107807	0.127453
2014-11-25 13:00:00	16.9223	34.8555	7.64427	103.642	6.78502	2.61283	30.7464	6.43056	5293.49	518.022	16.0613	-70.0414	785.049	-11.3099	155193	414550	77042.5	0.0582635	0.0406717	0.0879849	0.0861803
2014-11-25 14:00:00	17.5173	35.1221	7.721	114.837	7.42123	2.81449	15.8875	7.45833	3911.16	442.112	14.1551	-68.1574	571.723	-10.1593	274085	517198	-25605.1	0.0660505	0.0458032	0.0774656	0.0861007
2014-11-25 15:00:00	18.0504	35.3843	7.82895	133.183	8.50825	2.97962	9.66304	7.70833	3063.91	391.204	11.9731	-64.747	412.235	-9.03903	372456	525844	-34250.7	0.0608396	0.0408725	0.06177	0.0748482
2014-11-25 16:00:00	18.0947	35.3901	7.81885	131.287	8.38097	2.94883	15.0327	7.74722	2769.5	367.765	9.58839	-63.077	423.8	-9.52164	354130	528880	-37287.2	0.0455834	0.0309045	0.048134	0.0573732
2014-11-25 17:00:00	18.0559	34.9162	7.67815	112.866	7.2254	2.7069	24.5346	6.16667	3781.82	429.2	10.3473	-66.5655	626.127	-11.091	209659	470467	21126.2	0.0288009	0.0215367	0.0471195	0.0417891
2014-11-25 18:00:00	17.8275	34.1801	7.48653	92.6783	5.9882	2.52532	30.0249	7.20833	5535.26	522.501	13.6473	-73.0506	1050.01	-12.9529	108068	352855	138738	0.0581941	0.0409489	0.076638	0.0809184
2014-11-25 19:00:00	17.7097	33.9327	7.43293	88.4148	5.73533	2.38955	25.2756	6.68056	8124.8	635.393	16.3086	-72.6093	1232.62	-13.2978	52665	246245	245348	0.0606658	0.0439887	0.0876606	0.0852925
2014-11-25 20:00:00	17.4066	33.9126	7.4194	86.9182	5.67222	2.29703	15.2116	6.43056	8960.13	670.429	17.6649	-72.414	1305.63	-13.5555	30125.3	174527	317066	0.0593372	0.0438848	0.0869926	0.0798502
2014-11-25 21:00:00	17.4003	33.7291	7.3945	88.0635	5.7529	2.23043	10.7822	6.43056	9971.81	708.985	18.1234	-72.611	1355.09	-13.7546	21028.9	126929	364664	0.0611278	0.0452069	0.088232	0.0810422
2014-11-25 22:00:00	17.1973	33.6915	7.37318	86.0782	5.64678	2.17923	5.40695	4.63889	9507.59	694.724					16903.7	94005.1	397588
2014-11-25 23:00:00	16.9703	33.7056	7.36142	84.5322	5.56972	2.14676	4.30961	5.40278	9116.83	682.619					15105.7	75228.5	416365
2014-11-26 00:00:00	16.9059	33.2441	7.57255	95.4478	6.316	2.21332	30.2606	3.59722	7652.42	622.023					21165.5	118050	373543
2014-11-26 01:00:00	17.142	32.2332	7.84278	112.463	7.45233	2.49991	53.7401	3.34722	3615.5	425.862					99338.4	331891	159702
2014-11-26 02:00:00	16.9651	32.5912	7.81315	109.129	7.23737	2.83977	#REF!	2.58333	3326.74	411.333					289005	510896	-19303.3
2014-11-26 03:00:00	16.4393	34.4579	7.74602	104.083	6.89827	3.18864	9.79487	2.58333	2930.1	388.261					498028	375918	115675
2014-11-26 04:00:00	16.364	35.9222	7.75252	107.204	7.05107	3.35579	2.98904	3.34722	1932.28	315.056					598840	125307	366286
2014-11-26 05:00:00	16.323	36.0976	7.76308	108.332	7.12595	3.35787	4.22529	3.61111	1347.72	262.671					600715	119350	372243
2014-11-26 06:00:00	15.9923	35.8765	7.72613	102.176	6.77193	3.09195	14.2314	3.61111	2138.46	330.204					440083	455254	36339.3
2014-11-26 07:00:00	15.4864	35.0153	7.64492	92.8998	6.25255	2.76953	21.7122	3.61111	3743.06	445.868					247038	497916	-6323.44
2014-11-26 08:00:00	15.2788	34.5892	7.594	88.7552	6.01468	2.59633	19.4572	3.59722	4335.8	482.353					145080	404963	86629.8
2014-11-26 09:00:00	15.2546	34.4186	7.55925	87.1477	5.91482	2.48174	19.9398	3.86111	4962.9	516.595					87058.9	319461	172132
2014-11-26 10:00:00	15.4819	34.325	7.5345	87.1478	5.8901	2.39984	17.7969	4.375	5619.54	547.362					55423.6	254371	237222
2014-11-26 11:00:00	15.8272	34.2616	7.51975	87.476	5.8754	2.35299	13.4988	5.15278	6574.68	589.341					41671.8	217247	274346
2014-11-26 12:00:00	16.5349	34.1766	7.51903	89.0577	5.90127	2.37836	21.554	4.125	5726.92	540.542					48791.1	237291	254302
2014-11-26 13:00:00	18.5442	34.948	7.75138	126.88	8.02967	2.53346	38.4381	3.86111	4463.35	462.871					113227	358250	133343
2014-11-26 14:00:00	18.9054	35.391	7.86712	143.967	9.0477	2.73865	18.2266	3.34722	2662.61	357.269					228553	488145	3448.41
2014-11-26 15:00:00	18.3039	35.3592	7.85713	142.737	9.07542	2.91372	11.1574	3.08333	2581.04	354.942					333251	530814	-39221
2014-11-26 16:00:00	18.2206	35.3641	7.8146	130.166	8.29005	3.0495	4.48478	3.09722	2729.77	364.252					414341	503244	-11651.2
2014-11-26 17:00:00	18.122	35.4476	7.82242	131.723	8.39953	2.95351	14.2197	7.45833	2871.79	372.988					356985	522977	-31384.4
2014-11-26 18:00:00	18.1213	35.2387	7.78343	128.261	8.18652	2.68488	24.9141	7.03611	3548.74	411.601					196577	459013	32580.3
2014-11-26 19:00:00	17.1802	34.6829	7.6028	105.332	6.86937	2.51561	24.763	6.16667	6314.45	565.26					103147	345560	146033
2014-11-26 20:00:00	16.7322	34.4737	7.53218	97.8357	6.44598	2.39592	24.0303	5.65972	7429.04	618.255					54495	251288	240305
2014-11-26 21:00:00	16.5293	34.3661	7.49748	94.1895	6.23277	2.31357	14.2244	5.66667	8026.35	644.918					33113.3	186925	304668
2014-11-26 22:00:00	16.4807	34.32	7.47485	92.0535	6.10033	2.25686	9.24794	5.40278	9214.35	690.338					23938.5	145153	346440
2014-11-26 23:00:00	16.4293	34.2988	7.45783	90.619	6.01325	2.2129	5.70202	5.15278	9792.73	713.628					19342	115158	376435
2014-11-27 00:00:00	16.3788	34.2975	7.44642	89.0922	5.91517	2.18863	5.44354	4.88889	10408.9	736.105					17473.5	99638.8	391954
2014-11-27 01:00:00	16.4233	33.9291	7.67132	100.598	6.69143	2.32597	50.9217	5.66667	7170.75	604.341					40916	198724	292869
2014-11-27 02:00:00	16.5144	33.5274	7.81925	110.718	7.36952	2.64669	#REF!	3.34722	3499.73	421.41					175533	432039	59554.2
2014-11-27 03:00:00	16.4138	34.2072	7.76148	105.056	6.97497	3.01788	17.6337	2.83333	4221.65	465.122					395719	495987	-4394.22
2014-11-27 04:00:00	16.3133	35.6125	7.73737	104.742	6.91167	3.29729	5.43675	3.09722	2142.03	329.87					562867	230492	261101
	16.3292	36.1124	7.75646	107.2	7.05154	3.38309	2.18474	5.66667							617214	68367.1	423226
